# Supplementary material for: Molecular Design of Sexiphenyl-Based Liquid Crystals: Towards Temperature-Stable, Nematic Phases with Enhanced Optical Properties
Source: MDPI journal article supplement (doi:10.3390/molecules29050946), 2024-02-21
Supplement: s1 [file s1]

## Supplementary Information

### Molecular Design of Sexiphenyl-Based Liquid Crystals: Towards Temperature-Stable, Nematic Phases with Enhanced Optical Properties

Jakub Herman, Piotr Harmata, Natan Rychłowiec and Przemysław Kula\*

Institute of Chemistry, Faculty of Advanced Technologies and Chemistry,  
Military University of Technology, gen. S. Kaliskiego 2, 00-908 Warsaw, Poland

email: przemyslaw.kula@wat.edu.pl

#### Contents

|                                                       |    |
|-------------------------------------------------------|----|
| 1. Synthesis experimental procedures .....            | 2  |
| 2. Nuclear Magnetic Resonance data .....              | 6  |
| 3. Mass Spectrum MS(EI) data .....                    | 27 |
| 4. Differential scanning calorimetry (DSC) data ..... | 35 |
| 5. Computational investigation .....                  | 39 |

## 1. Synthesis experimental procedures

**3-ethyl-4''-propyl-1,1':4',1''-terphenyl (3)** - flask containing 1-ethyl-3-iodobenzene (**2**) (25g ; 0.108mol), 4'-propylbiphenyl-4-yl boronic acid (**1**) (26g ; 0.108mol), potassium acetate (40g ; 0.3mol), acetone (400cm<sup>3</sup>) and water (100cm<sup>3</sup>) was flushed with nitrogen under reflux for 30min. Then catalyst PdCl<sub>2</sub> (3mol%) was added and reaction was refluxed for 10h. Next reaction was cooled to room temperature and poured into 5% HCl solution. Product was extracted with toluene, organic layer was washed with water x3, dried over MgSO<sub>4</sub>. Solvent was evaporated, product was recrystallized twice from acetone, yield 22g (77%), <sup>1</sup>H NMR (500 MHz, CDCl<sub>3</sub>) δ ppm 1.05 (t, J=7.32 Hz, 3 H) 1.36 (t, J=7.63 Hz, 3 H) 1.76 (m, J=7.48, 7.48, 7.48, 7.48, 7.32 Hz, 2 H) 2.70 (m, 2 H) 2.79 (q, J=7.63 Hz, 2 H) 7.26 (d, J=7.63 Hz, 1 H) 7.33 (d, J=8.24 Hz, 2 H) 7.43 (t, J=7.48 Hz, 1 H) 7.53 (m, 2 H) 7.62 (d, J=8.24 Hz, 2 H) 7.72 (s, 4 H). <sup>13</sup>C NMR (500 MHz, CDCl<sub>3</sub>) δ ppm 13.88 ; 15.64 ; 24.53 ; 28.99 ; 37.72 ; 124.39 ; 126.65 ; 126.83 ; 127.23 ; 127.47 ; 128.75 ; 128.91 ; 138.10 ; 139.98 ; 140.04 ; 140.83 ; 141.90 ; 144.73

**3-ethyl-4-iodo-4''-propyl-1,1':4',1''-terphenyl (4)** - The mixture consisted of 3-ethyl-4''-propyl-1,1':4',1''-terphenyl (**3**) (21.5 g; 0.07 mol), I<sub>2</sub> (7.3 g; 0.029 mol), HIO<sub>3</sub> (2.5 g; 0.014 mmol), glacial acetic acid (500 cm<sup>3</sup>), water (50 cm<sup>3</sup>) and concentrated sulphuric acid (5 cm<sup>3</sup>) was stirred for 3 h under reflux. After the completion of reagents, mixture was poured into Na<sub>2</sub>SO<sub>3</sub> water solution. The product was isolated and dried. Product (**4**) was recrystallized from acetone, yield 22g (72%).

**(3-ethyl-4''-propyl-1,1':4',1''-terphenyl-4-yl)boronic acid (5)** - flask containing 3-ethyl-4-iodo-4''-propyl-1,1':4',1''-terphenyl (**4**) (8g ; 19mmol) and anhydrous THF (200cm<sup>3</sup>) was flushed with nitrogen and cooled to -78°C in an acetone/dry ice bath. Solution of *tert*-butyllithium dissolved in pentane (23mmol) was added dropwise and temperature was kept below -70°C for 2.5h. Then trimethyl borate (2.4g; 23mmol) was added dropwise and temperature was kept below -70°C. The reaction mixture was allowed to reach room temperature. Then tetrahydrofuran was evaporated and crude product was treated with water and hydrochloric acid. Product was filtered off and dried. m.p=>230°C (decomposition), yield 5.5g (84%), <sup>1</sup>H NMR (500 MHz, THF-d<sub>8</sub>) δ ppm 0.97 (t, J=7.32 Hz, 3 H) 1.26 (t, J=7.48 Hz, 3 H) 1.68 (m, 2 H) 2.63 (t, J=7.63 Hz, 2 H) 2.95 (q, J=7.32 Hz, 2 H) 7.20 (s, 2 H) 7.25 (d, J=7.63 Hz, 2 H) 7.43 (d, J=7.63 Hz, 1 H) 7.48 (s, 1 H) 7.58 (m, 3 H) 7.69 (q, J=8.04 Hz, 4 H). <sup>13</sup>C NMR (500 MHz, THF-d<sub>8</sub>) δ ppm 14.12; 17.50; 25.80; 30.10 ; 38.49 ; 123.69 ; 127.24 ; 127.43 ; 127.76 ; 127.97 ; 129.65 ; 134.95 ; 139.08 ; 140.79 ; 140.93 ; 141.98 ; 142.50 ; 150.29

**2'''',3''-diethyl-4,4''''-dipropyl-1,1':4',1''':4''',1''''':4''''',1''''''-sexiphenyl Sexi\_Ph1** - flask containing a mixture of (3-ethyl-4''-propyl-1,1':4',1''-terphenyl-4-yl)boronic acid (**4**) (2.3 g; 6.7 mmol) and 3-ethyl-4-iodo-4''-propyl-1,1':4',1''-terphenyl (**5**) (1.9 g; 4.4 mmol) in 100 cm<sup>3</sup> of dimethoxyethane, 20 cm<sup>3</sup> of water with 4.4 g (13mmol) of anhydrous caesium carbonate was flushed with nitrogen under reflux for 30min. Then catalyst PdCl<sub>2</sub> (3mol%) was added and reaction was refluxed for 10h. Next reaction was cooled to room temperature and poured into 5% HCl solution. Product was filtered off and dried. Product was purified using liquid chromatography (silica gel-dichloromethane) and recrystallization from toluene, yield 1.3g (49%), <sup>1</sup>H NMR (500 MHz, CDCl<sub>3</sub>) δ 0.92 (t, J=7.30 Hz, 6 H) 1.03 (t, J=6.70 Hz, 6 H) 1.63 (m, 4 H) 2.60 (t, 4 H) 3.08 (q, 4 H) 7.08 (d, 2 H) 7.33 (d, J=7.90 Hz, 2 H) 7.46 (s, 2 H) 7.49 (dd, J=7.78, 4 H) 7.58 (d, J=7.93 Hz, 4 H) 7.74 (d, J=8.24 Hz, 4 H) 7.90 (d, J=8.20 Hz, 4 H) <sup>13</sup>C NMR (500 MHz, CDCl<sub>3</sub>) δ 143.28 ; 141.51 ; 139.91 ; 137.6 ; 137.16 ; 132.86 ; 132.58 ; 131.91 ; 130.81 ; 129.91 ; 123.66 ; 122.3 ; 112.65 ; 98.85 ; 37.69 ; 26.27 ; 24.58 ; 15.07 ; 14.21

**1-chloro-3-propylbenzene (7)** - a solution of 1-bromo-3-chlorobenzene (**6**) (95g, 0.5 mol) in anhydrous THF (500cm<sup>3</sup>) was added dropwise to Mg chips (12g, 0.5 mol) with vigorous stirring under N<sub>2</sub> atmosphere. The mixture was refluxed for 1 h, then a solution of catalyst Li<sub>2</sub>CuCl<sub>4</sub> in anhydrous THF (3mol%) was added. Next, propyl bromide (61g, 0.5 mol) was added dropwise to the mixture which was stirred under reflux for 5h. When the reaction was completed the mixture was poured into 500cm<sup>3</sup> of H<sub>2</sub>O and 100 cm<sup>3</sup> of 10% HCl. The crude product was extracted with hexane. The organic layer was washed with H<sub>2</sub>O, separated, dried over MgSO<sub>4</sub> and the solvent evaporated. The product was distilled under reduced pressure: b.p. 98-100°C (25 mmHg), yield 24.3 g (32%).

**4'-pentyl-3-propylbiphenyl (9\_Pr)** - flask containing 1-chloro-3-propylbenzene (**7**) (24g ; 0.156mol), 4-pentylbenzene boronic acid (**8**) (33g ; 0.17mol), caesium carbonate (127g ; 0.39mol) and anhydrous tetrahydrofuran (200cm<sup>3</sup>) was flushed with nitrogen under reflux for 30min. Then catalyst PdCl<sub>2</sub> (3mol%) and SPhoS (1.5mol%) were added and reaction was refluxed for 10h. Next reaction was cooled to room temperature and poured into 5% HCl solution. Product was extracted with toluene, organic layer was washed with water, dried over MgSO<sub>4</sub>. Solvent was evaporated, The product was distilled under reduced pressure: b.p. 150°C (0.1 mmHg), yield 34g (81%).

**4'-pentyl-3-ethylbiphenyl (9\_Et)** – analogous procedure. b.p. 130°C (0.1 mmHg), yield 24g (78%).

**4-iodo-4'-pentyl-3-propylbiphenyl (10\_Pr)** – synthesis using standard iodination procedure described for (**4**). Product purified using column chromatography (silica gel – hexane). Brown oily liquid

**4-iodo-4'-pentyl-3-ethylbiphenyl (10\_Et)** – synthesis using standard iodination procedure described for (**4**). Product purified using column chromatography (silica gel – hexane). Brown oily liquid

**(4'-pentyl-3-propylbiphenyl-4-yl) boronic acid (11\_Pr)** – synthesis using standard lithiation-boronation procedure described for (**5**). White crystals, yield 14g (61%). <sup>1</sup>H NMR (500 MHz, THF-d<sub>8</sub>) δ ppm 0.91 (t, J=6.87 Hz, 3 H) 0.96 (t, J=7.32 Hz, 3 H) 1.35 (s, 1 H) 1.36 (d, J=3.66 Hz, 3 H) 1.66 (m, 4 H) 2.63 (m, 2 H) 2.88 (m, 2 H) 7.16 (s, 2 H) 7.21 (d, J=8.24 Hz, 2 H) 7.35 (d, J=7.63 Hz, 1 H) 7.38 (s, 1 H) 7.52 (d, J=8.24 Hz, 2 H) 7.55 (d, J=7.63 Hz, 1 H). <sup>13</sup>C NMR (500 MHz, THF-d<sub>8</sub>) ppm 14.38 ; 14.51 ; 23.44 ; 26.82 ; 32.18 ; 32.44 ; 36.34 ; 39.20 ; 123.66 ; 127.50 ; 127.98 ; 129.44 ; 134.88 ; 139.72 ; 142.21 ; 142.53 ; 148.49

**(4'-pentyl-3-ethylbiphenyl-4-yl)boronic acid (11\_Et)** – synthesis using standard lithiation-boronation procedure described for (**5**). White crystals, yield 10g (55%).

**4-bromo-4''-pentyl-2'-propyl-1,1':4',1''-terphenyl (13\_Pr)** - synthesis using standard Suzuki cross-coupling procedure described for (**3**). Product recrystallized from ethyl alcohol/acetone mixture (5/1 vol/vol), white crystals, yield 13g (90%).

**4-bromo-4''-pentyl-2'-ethyl-1,1':4',1''-terphenyl (13\_Et)** - synthesis using standard Suzuki cross-coupling procedure described for **(3)**. Product recrystallized from ethyl alcohol/acetone mixture (5/1 vol/vol), white crystals, yield 10g (79%). <sup>1</sup>H NMR (500 MHz, CDCl<sub>3</sub>) δ ppm 0.99 (t, J=6.71 Hz, 3 H) 1.21 (t, J=7.48 Hz, 3 H) 1.44 (m, 4 H) 1.74 (m, 2 H) 2.71 (dd, J=7.78, 3.81 Hz, 3 H) 2.74 (s, 1 H) 7.29 (d, J=8.24 Hz, 3 H) 7.34 (d, J=7.93 Hz, 2 H) 7.51 (d, J=7.63 Hz, 1 H) 7.59 (s, 1 H) 7.61 (dd, J=7.93, 5.19 Hz, 4 H). <sup>13</sup>C NMR (500 MHz, CDCl<sub>3</sub>) δ 142.2 ; 141.8 ; 140.7 ; 139.0 ; 138.2 ; 131.2 ; 130.9 ; 130.2 ; 128.8 ; 127.4 ; 126.9 ; 124.3 ; 121.0 ; 35.6 ; 31.6 ; 31.2 ; 26.3 ; 22.6 ; 15.7 ; 14.0

**4,4,5,5-tetramethyl-2-(4''-pentyl-2'-propyl-1,1':4',1''-terphenyl-4-yl)-1,3,2-dioxaborolane (14\_Pr)** - flask containing 4-bromo-4''-pentyl-2'-propyl-1,1':4',1''-terphenyl (**13\_Pr**) (7g ; 17mmol), bis(pinacolato)diboron (4.8g ; 18.9mmol), caesium carbonate (19.6g ; 60mmol) and toluene (200cm<sup>3</sup>) was flushed with nitrogen under reflux for 30min. Then catalyst Pd(dba)<sub>2</sub> (2mol%) and XPhoS (2mol%) were added and reaction was refluxed for 10h. Next reaction was cooled to room temperature and poured into 5% HCl solution. Product was extracted with toluene, organic layer was washed with water, dried over MgSO<sub>4</sub>. Solvent was evaporated, The product was recrystallized from acetone, yield 6g (77%). <sup>1</sup>H NMR (500 MHz, CDCl<sub>3</sub>) δ ppm 0.83 (t, J=7.32 Hz, 3 H) 0.92 (t, J=6.56 Hz, 3 H) 1.36 (d, J=6.71 Hz, 2 H) 1.38 (s, 11 H) 1.53 (m, 2 H) 1.57 (s, 2 H) 1.67 (m, 2 H) 2.64 (dt, J=19.91, 7.90 Hz, 4 H) 7.27 (m, 3 H) 7.37 (d, J=7.93 Hz, 2 H) 7.45 (d, J=7.93 Hz, 1 H) 7.56 (d, J=7.93 Hz, 2 H) 7.87 (d, J=7.93 Hz, 2 H). <sup>13</sup>C NMR (500 MHz, CDCl<sub>3</sub>) δ 13.78 ; 22.31 ; 24.29 ; 24.67 ; 30.92 ; 31.33 ; 35.02 ; 35.35 ; 83.56 ; 123.94 ; 126.70 ; 127.69 ; 128.47 ; 128.54 ; 130.06 ; 134.24 ; 138.14 ; 140.00 ; 140.09 ; 140.24 ; 141.81 ; 144.54

**4,4,5,5-tetramethyl-2-(4''-pentyl-2'-ethyl-1,1':4',1''-terphenyl-4-yl)-1,3,2-dioxaborolane (14\_Et)** - The product was recrystallized from acetone, yield 6g (72%).

**2''',3'-diethyl-4,4''''-dipentyl-1,1':4',1''':4'',1''':4''',1''':4''',1''''-sexiphenyl Sexi\_Ph2** - synthesis using standard Suzuki cross-coupling procedure described for **Sexi\_Ph1**. Product was purified using liquid chromatography (silica gel-dichloromethane) and recrystallization from toluene, yield 1.0g (45%), <sup>1</sup>H NMR (500 MHz, CDCl<sub>3</sub>) δ ppm 0.95 (m, 6 H) 1.22 (t, J=7.48 Hz, 6 H) 1.39 (s, 4 H) 1.41 (d, J=3.66 Hz, 4 H) 1.70 (m, J=7.40, 7.40, 7.40, 7.40 Hz, 4 H) 2.69 (m, 4 H) 2.77 (q, J=7.53 Hz, 4 H) 7.30 (d, J=7.93 Hz, 4 H) 7.36 (d, J=7.63 Hz, 2 H) 7.48 (d, J=7.93 Hz, 4 H) 7.51 (dd, J=7.78, 1.68 Hz, 2 H) 7.60 (m, 6 H) 7.75 (d, J=8.24 Hz, 4 H) <sup>13</sup>C NMR (500 MHz, CDCl<sub>3</sub>) δ 142.08 ; 142.00 ; 140.74 ; 140.43 ; 139.95 ; 139.20 ; 138.42 ; 130.45 ; 129.74 ; 128.81 ; 127.35 ; 126.95 ; 126.67 ; 124.28 ; 35.62 ; 31.59 ; 31.18 ; 26.37 ; 22.57 ; 15.77 ; 14.04

**2''',3'-dipropyl-4,4''''-dipentyl-1,1':4',1''':4'',1''':4''',1''':4''',1''''-sexiphenyl Sexi\_Ph3** - synthesis using standard Suzuki cross-coupling procedure described for **Sexi\_Ph1**. Product was purified using liquid chromatography (silica gel-dichloromethane) and recrystallization from toluene, yield 1.1g (51%), <sup>1</sup>H NMR (500 MHz, CDCl<sub>3</sub>) δ 0.88 (t, J=7.32 Hz, 6 H) 0.93 (t, J=6.71 Hz, 6 H) 1.38 (m, 8 H) 1.60 (m, 4 H) 1.68 (m, 4 H) 2.68 (s, 8 H) 7.28 (d, J=7.93 Hz, 4 H) 7.33 (d, J=7.93 Hz, 2 H) 7.46 (d, J=7.94 Hz, 4 H) 7.49 (dd, J=7.78, 1.68 Hz, 2 H) 7.54 (s, 2 H) 7.58 (d, J=7.93 Hz, 4 H) 7.74 (d, J=8.24 Hz, 4 H) <sup>13</sup>C NMR (500 MHz, CDCl<sub>3</sub>) δ 142.08 ; 140.86 ; 140.50 ; 140.21 ; 139.12 ; 138.40 ; 130.49 ; 129.79 ; 128.81 ; 127.99 ; 126.96 ; 126.62 ; 124.27 ; 35.62 ; 35.37 ; 31.59 ; 31.18 ; 24.60 ; 22.57 ; 14.11 ; 14.04

**2''',3'-diethyl-4-pentyl-4''''-propyl-1,1':4',1'':4'',1''':4''',1''':4''''',1''''-sexiphenyl Sexi\_Ph4** - synthesis using standard Suzuki cross-coupling procedure described for [Sexi\\_Ph1](#). Product was purified using liquid chromatography (silica gel-dichloromethane) and recrystallization from toluene, yield 0.9g (45%), <sup>1</sup>H NMR (500 MHz, CDCl<sub>3</sub>) δ ppm 0.90 (m, 3 H) 0.94 (m, 3 H) 1.00 (t, J=7.32 Hz, 3 H) 1.22 (t, J=7.63 Hz, 3 H) 1.38 (dq, J=3.66, 3.46 Hz, 4 H) 1.60 (m, 2 H) 1.71 (m, 3 H) 2.67 (m, 4 H) 2.71 (m, 2 H) 2.78 (q, J=7.43 Hz, 2 H) 7.29 (dd, J=8.24, 1.83 Hz, 4 H) 7.36 (d, J=7.93 Hz, 1 H) 7.40 (d, J=7.63 Hz, 2 H) 7.42 (s, 3 H) 7.50 (dd, J=7.93, 1.83 Hz, 1 H) 7.55 (s, 2 H) 7.59 (dd, J=8.09, 1.98 Hz, 4 H) 7.62 (d, J=1.53 Hz, 1 H) 7.70 (d, J=8.24 Hz, 2 H) 7.74 (m, 2 H) <sup>13</sup>C NMR (500 MHz, CDCl<sub>3</sub>) δ 142.21 ; 142.11 ; 141.99 ; 140.59 ; 140.54 ; 140.41 ; 140.35 ; 140.20 ; 140.11 ; 140.06 ; 139.96 ; 139.74 ; 138.45 ; 138.15 ; 130.67 ; 130.57 ; 129.05 ; 128.99 ; 128.94 ; 128.86 ; 128.03 ; 127.47 ; 127.42 ; 127.36 ; 127.00 ; 126.90 ; 124.32 ; 124.30 ; 37.78 ; 35.66 ; 35.46 ; 31.63 ; 31.24 ; 26.48 ; 24.64 ; 22.62 ; 15.76 ; 14.17 ; 14.09 ; 13.94

**2''-ethyl-4-pentyl-3',4''''-dipropyl-1,1':4',1'':4'',1''':4''',1''':4''''',1''''-sexiphenyl Sexi\_Ph5** - synthesis using standard Suzuki cross-coupling procedure described for [Sexi\\_Ph1](#). Product was purified using liquid chromatography (silica gel-dichloromethane) and recrystallization from toluene, yield 1.0g (49%), <sup>1</sup>H NMR (500 MHz, CDCl<sub>3</sub>) δ 0.92 (s, 3 H) 0.96 (s, 3 H) 1.03 (s, 3 H) 1.25 (s, 3 H) 1.41 (s, 4 H) 1.63 (s, 2 H) 1.72 (s, 4 H) 2.71 (s, 6 H) 2.80 (s, 2 H) 7.31 (s, 4 H) 7.38 (s, 1 H) 7.42 (s, 1 H) 7.45 (s, 4 H) 7.52 (s, 1 H) 7.58 (s, 2 H) 7.61 (s, 4 H) 7.65 (s, 1 H) 7.72 (s, 2 H) 7.76 (s, 2 H) <sup>13</sup>C NMR (500 MHz, CDCl<sub>3</sub>) δ 142.15 ; 142.04 ; 141.92 ; 140.52 ; 140.49 ; 140.36 ; 140.31 ; 140.15 ; 140.05 ; 140.01 ; 139.9 ; 139.69 ; 138.40 ; 138.09 ; 130.62 ; 130.52 ; 129.01 ; 128.93 ; 128.89 ; 128.80 ; 127.79 ; 127.41 ; 127.36 ; 127.30 ; 126.95 ; 126.85 ; 124.28 ; 124.25 ; 37.73 ; 35.62 ; 35.42 ; 31.59 ; 31.18 ; 26.43 ; 24.57 ; 24.54 ; 22.57 ; 15.71 ; 14.12 ; 14.04 ; 13.89

**2''-ethyl-4,4''''-dipentyl-3'-propyl-1,1':4',1'':4'',1''':4''',1''':4''''',1''''-sexiphenyl Sexi\_Ph6** - synthesis using standard Suzuki cross-coupling procedure described for [Sexi\\_Ph1](#). Product was purified using liquid chromatography (silica gel-dichloromethane) and recrystallization from toluene, yield 1.3g (55%), <sup>1</sup>H NMR (500 MHz, CDCl<sub>3</sub>) δ ppm 0.91 (t, J=7.32 Hz, 3 H) 0.95 (m, 6 H) 1.23 (t, J=7.48 Hz, 3 H) 1.38 (s, 1 H) 1.40 (dd, J=6.71, 3.36 Hz, 7 H) 1.63 (m, 2 H) 1.70 (dd, J=14.80, 7.17 Hz, 4 H) 2.71 (m, 6 H) 2.77 (q, J=7.43 Hz, 2 H) 7.31 (d, J=6.71 Hz, 4 H) 7.36 (d, J=7.93 Hz, 2 H) 7.49 (m, 6 H) 7.57 (d, J=1.83 Hz, 1 H) 7.59 (s, 1 H) 7.61 (dd, J=8.09, 1.98 Hz, 4 H) 7.76 (m, 4 H) <sup>13</sup>C NMR (500 MHz, CDCl<sub>3</sub>) δ 142.08 ; 142.00 ; 140.84 ; 140.73 ; 140.49 ; 140.43 ; 140.18 ; 139.95 ; 139.18 ; 139.10 ; 138.41 ; 138.38 ; 130.49 ; 130.45 ; 129.75 ; 128.82 ; 127.98 ; 127.35 ; 126.96 ; 126.66 ; 126.63 ; 124.28 ; 35.62 ; 35.37 ; 31.59 ; 31.19 ; 26.37 ; 24.61 ; 22.57 ; 15.79 ; 14.12 ; 14.05

## 2. Nuclear Magnetic Resonance data

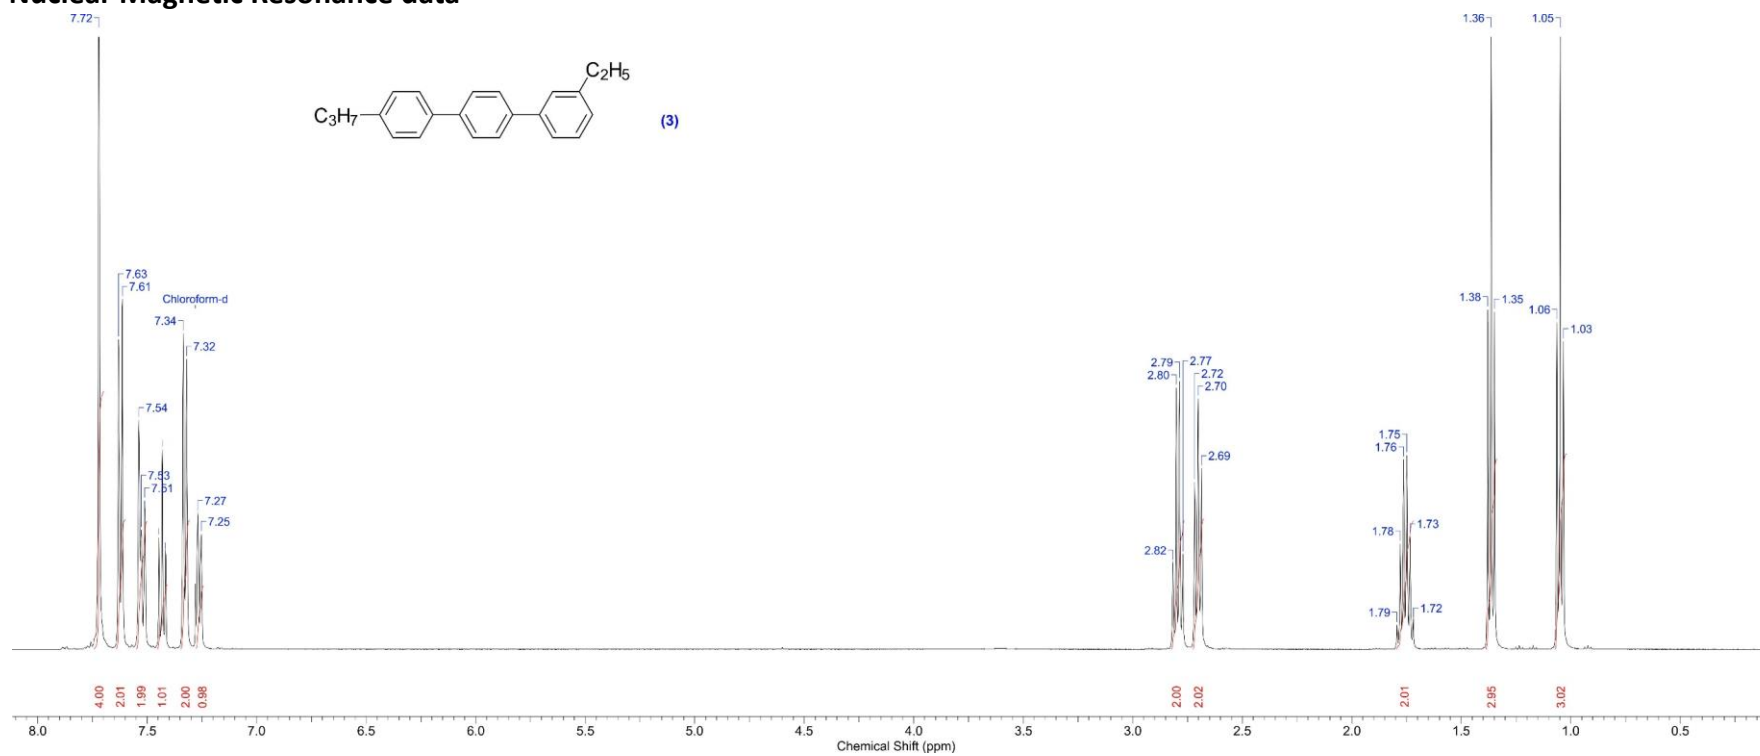

Figure S1. <sup>1</sup>H NMR of 3-ethyl-4''-propylterphenyl (**3**).

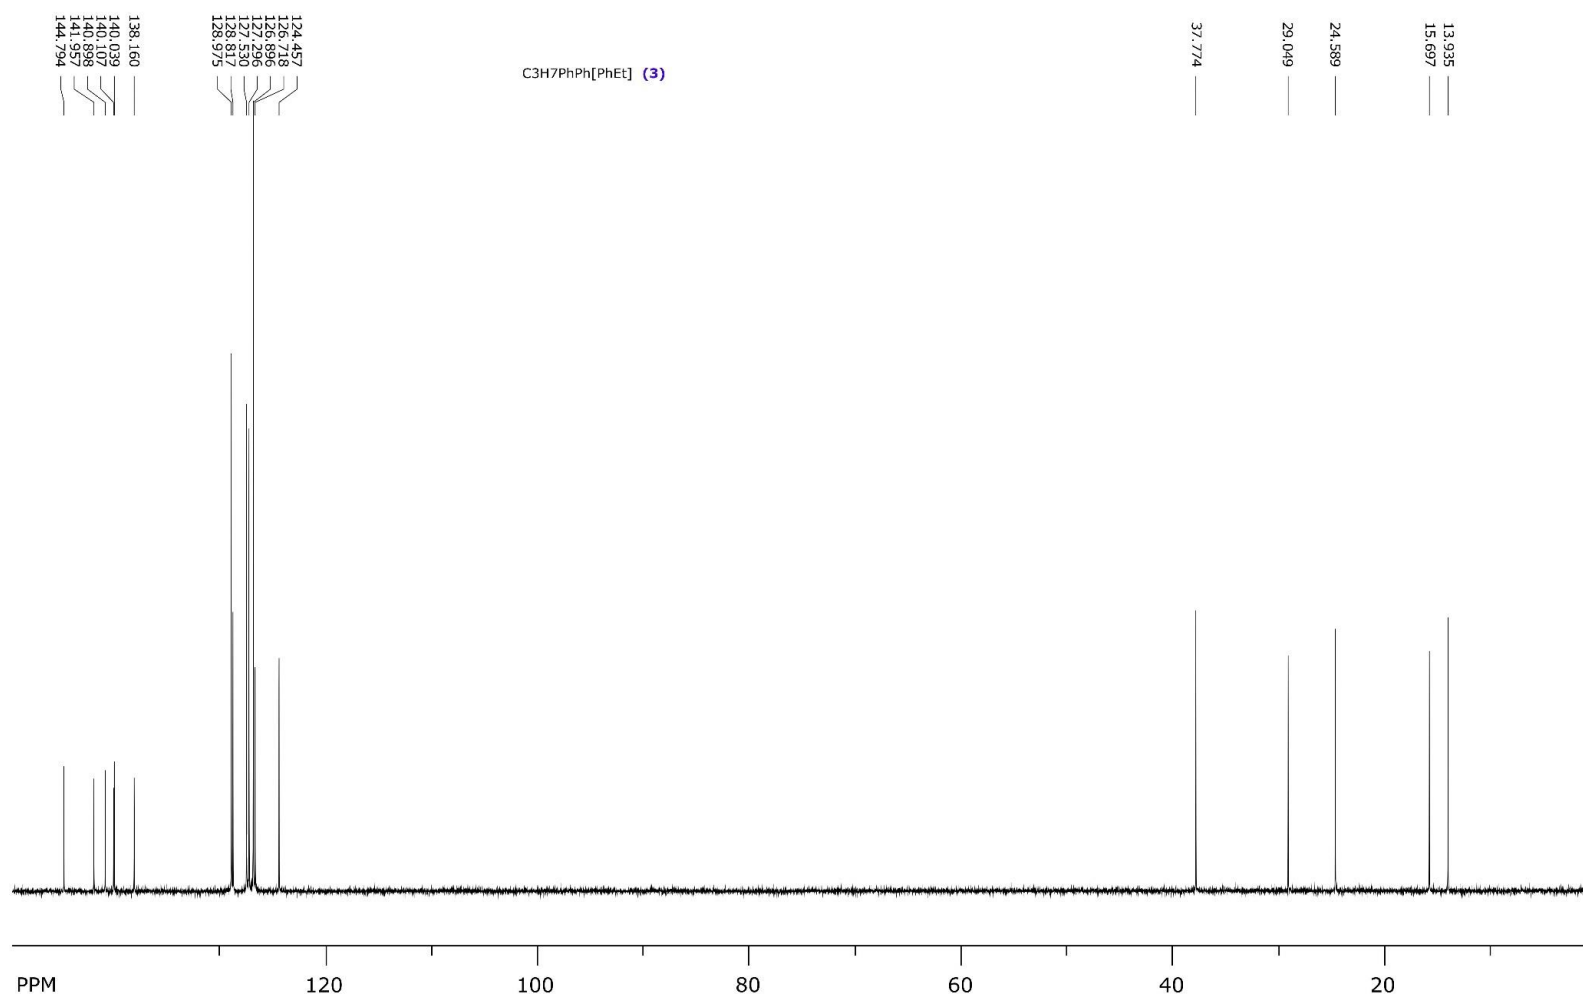

Figure S2.  $^{13}\text{C}$  NMR of 3-ethyl-4''-propylterphenyl (**3**).

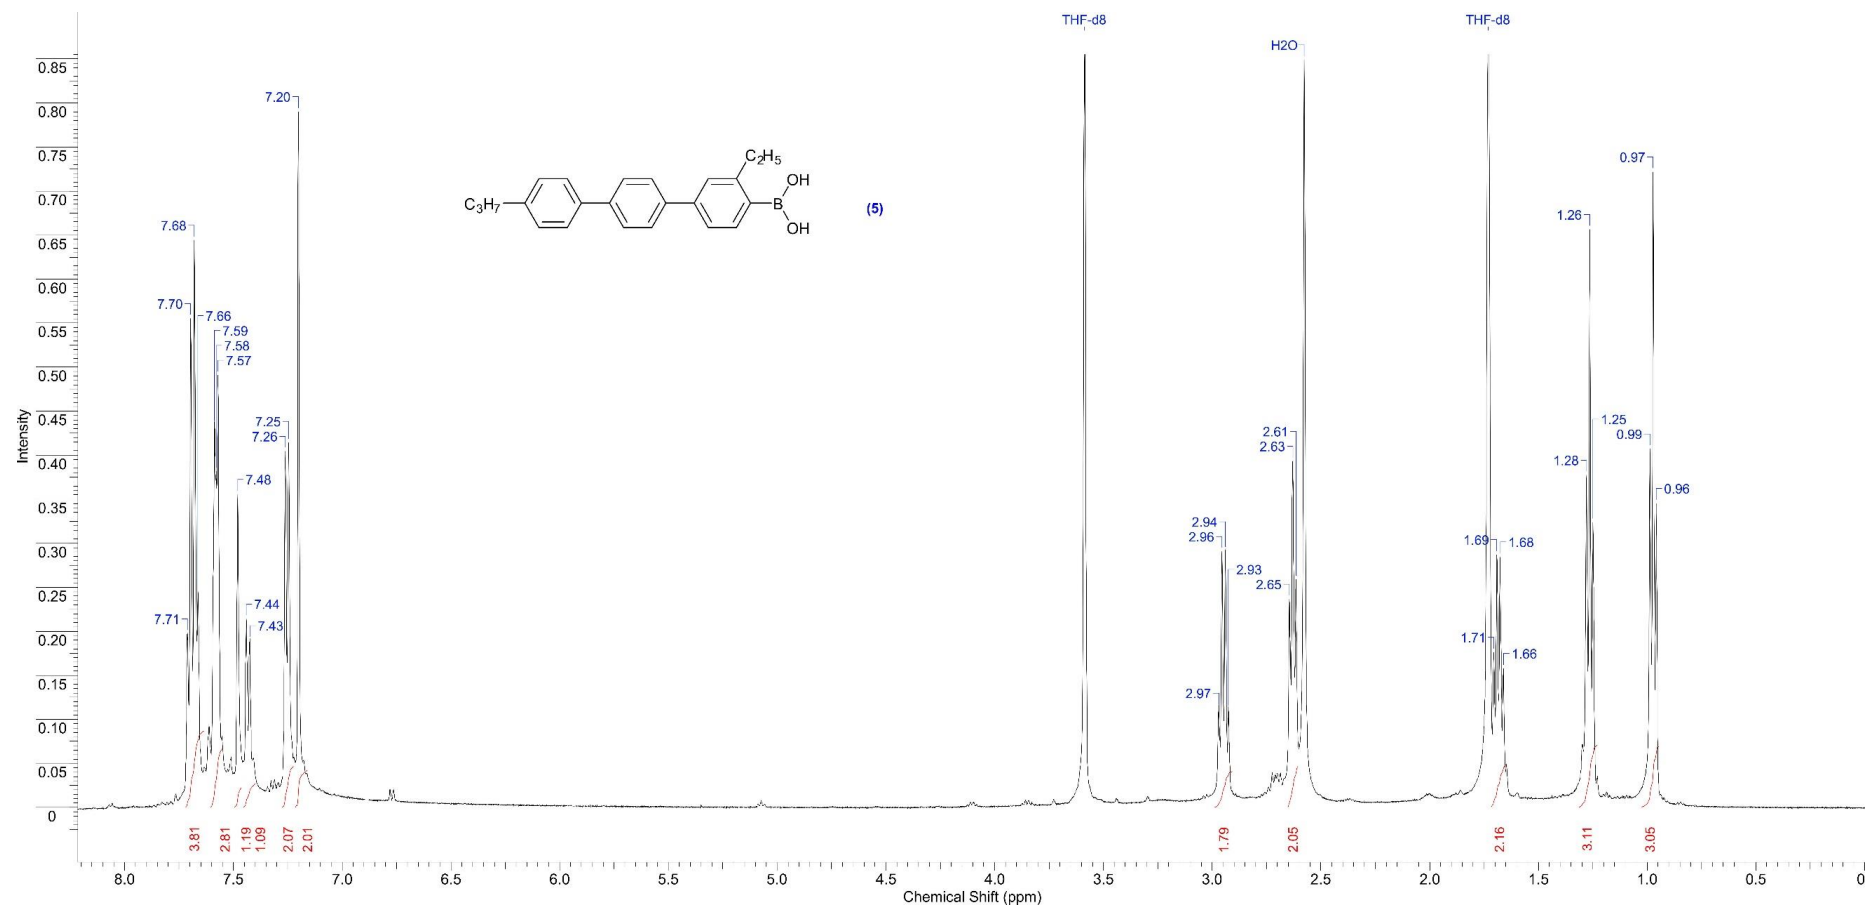

Figure S3. <sup>1</sup>H NMR of (3-ethyl-4''-propyl-1,1':4',1''-terphenyl-4-yl)boronic acid (5).



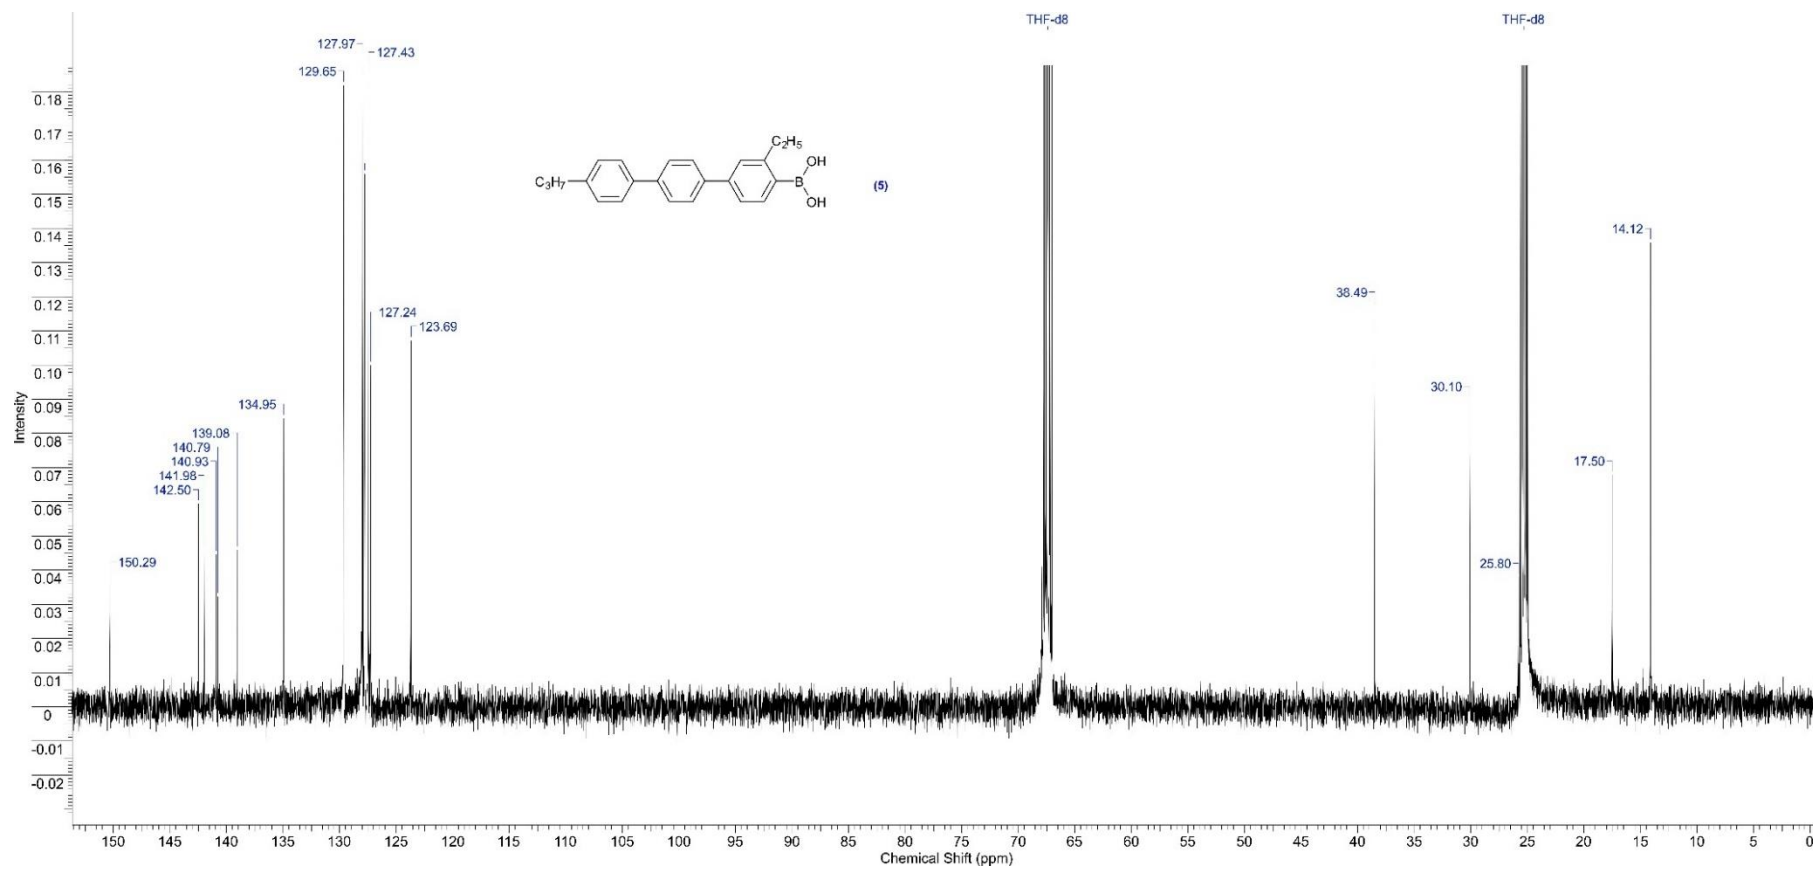

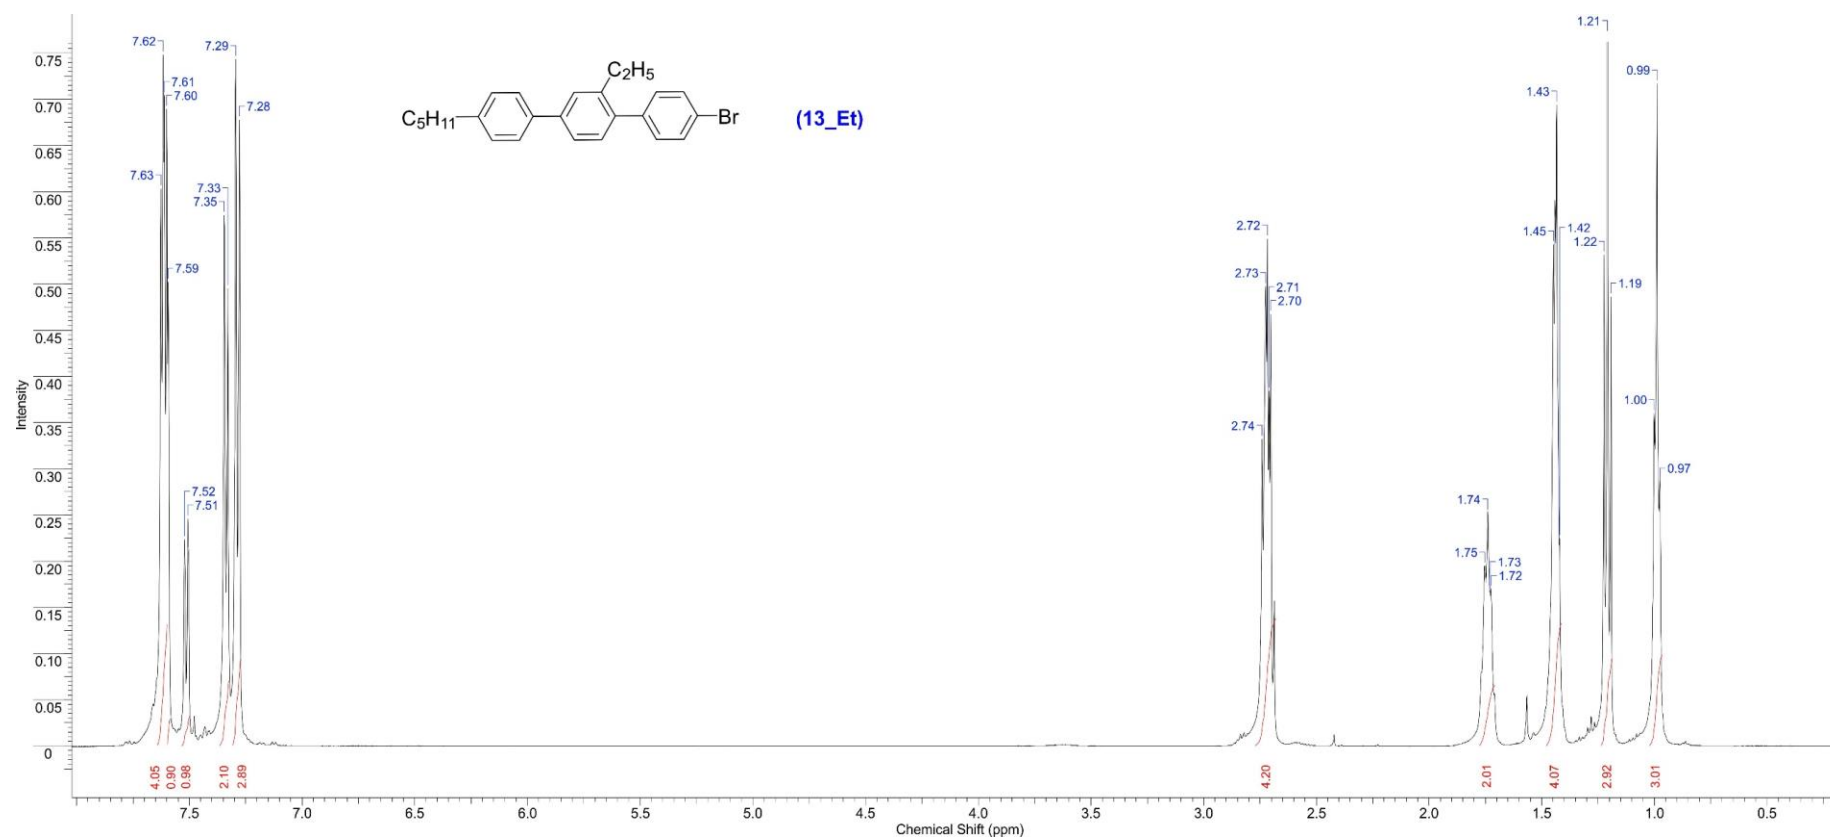

Figure S5.  $^1\text{H}$  NMR of 4-bromo-2'-ethyl-4''-pentyl-1,1':4',1''-terphenyl (**13\_Et**).

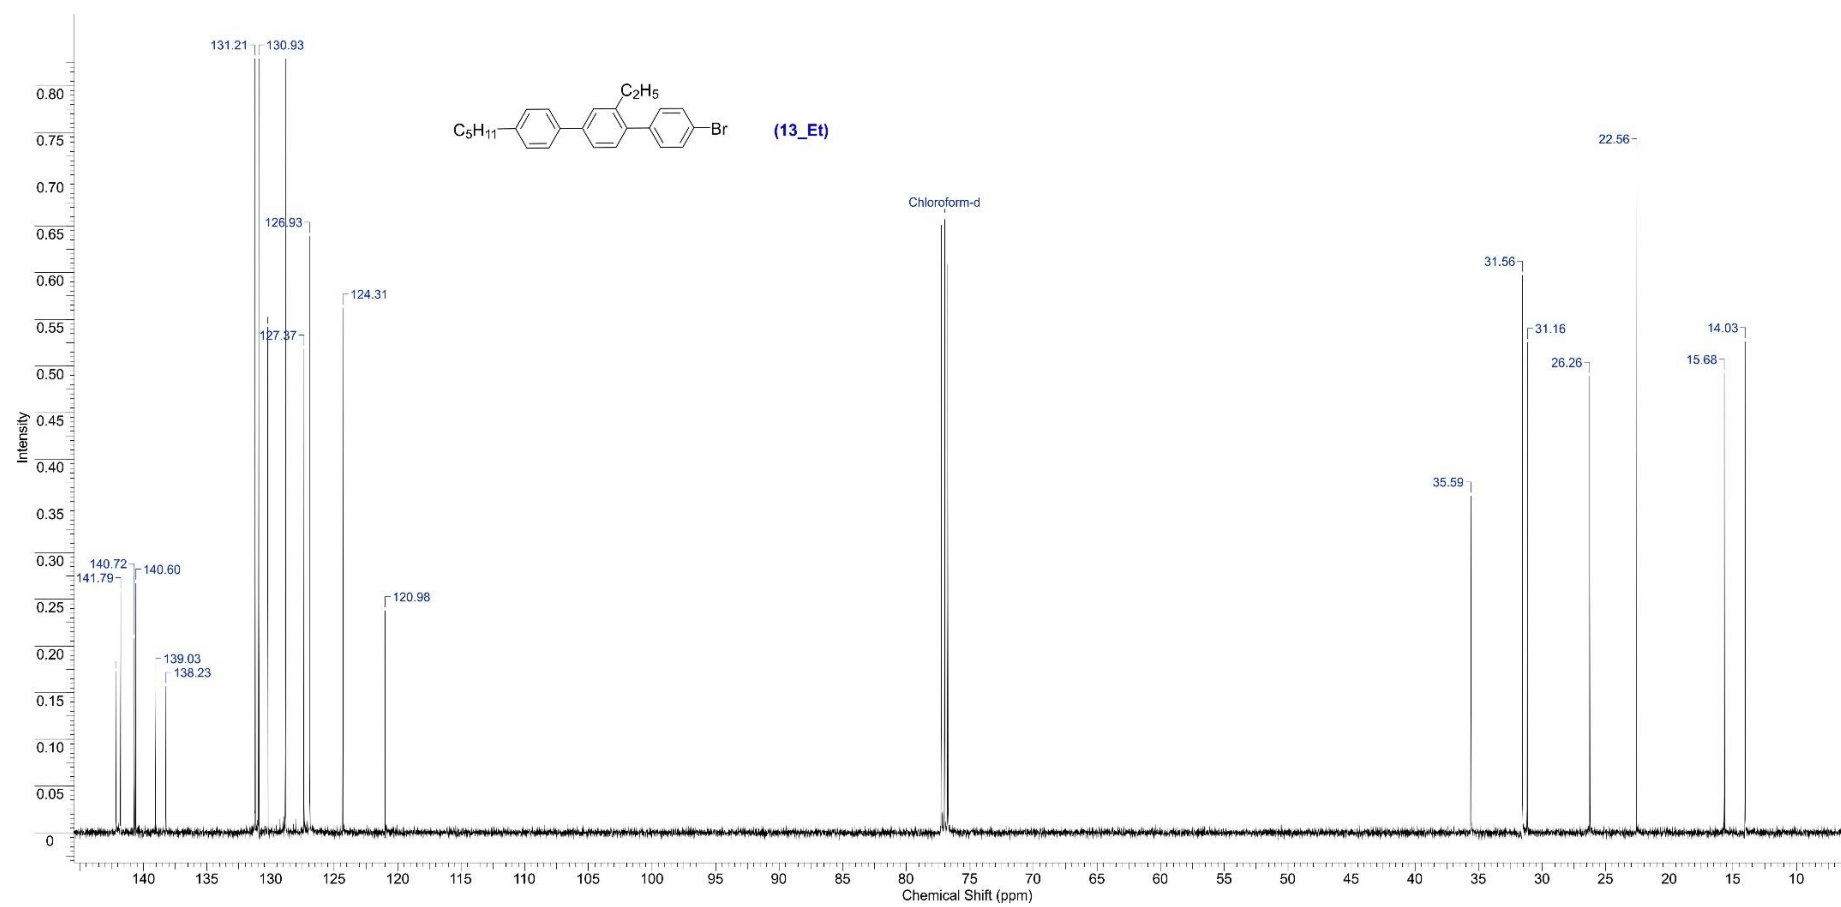

Figure S6. <sup>13</sup>C NMR of 4-bromo-2'-ethyl-4''-pentyl-1,1':4',1''-terphenyl (**13\_Et**).

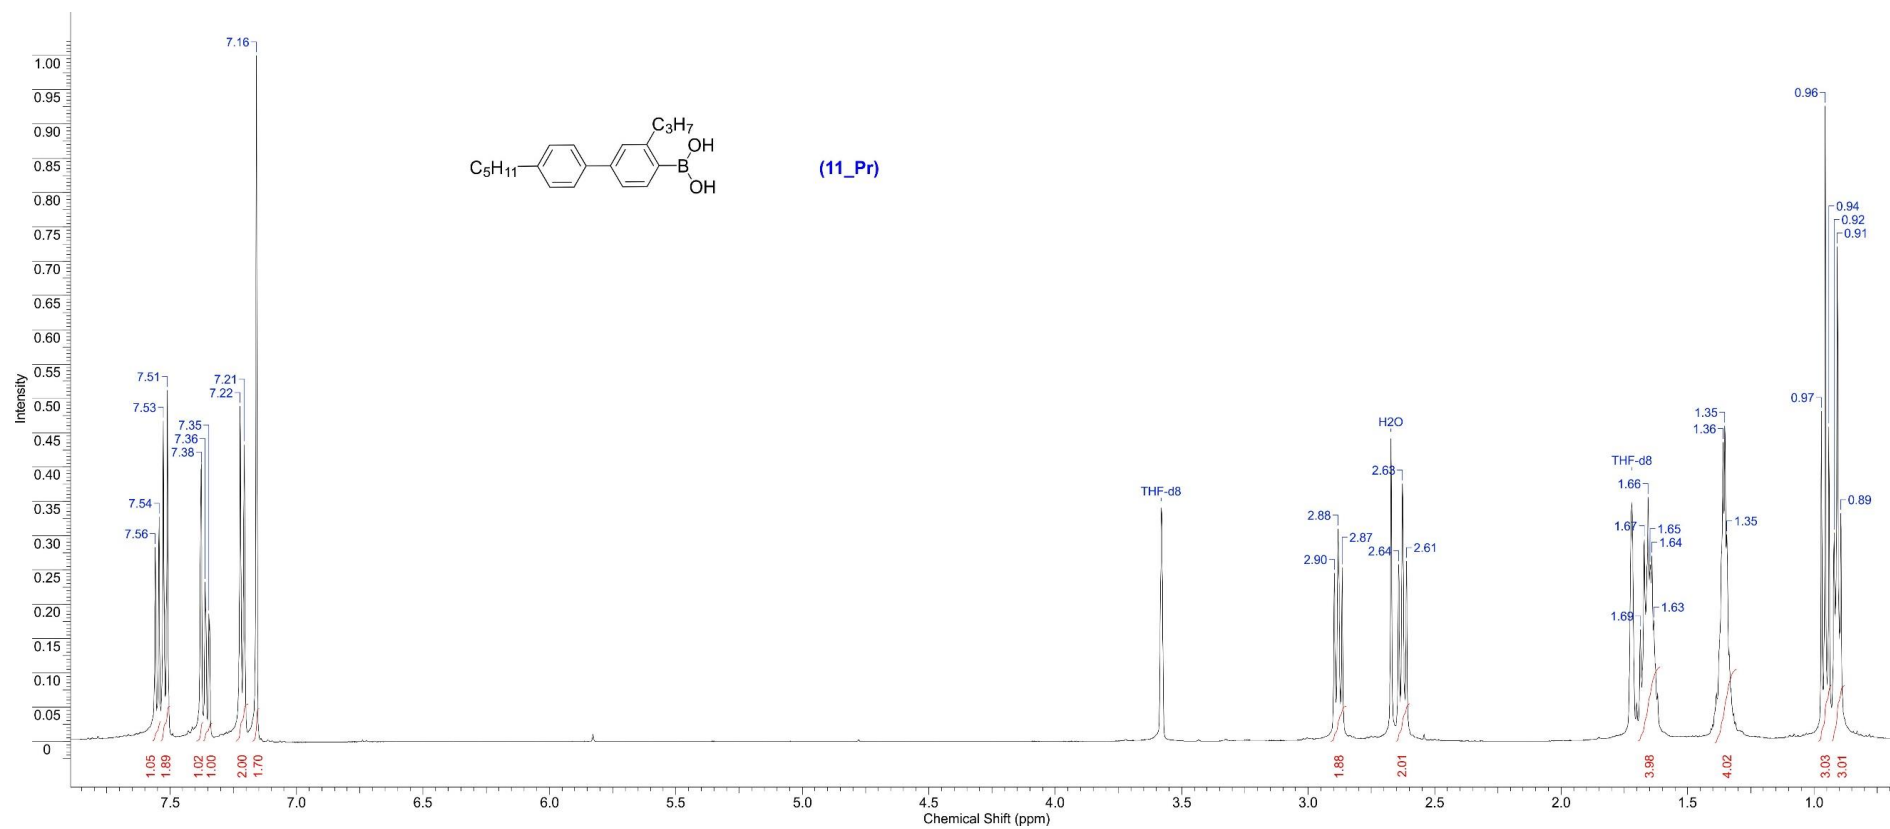

Figure S7. <sup>1</sup>H NMR of (4'-pentyl-3-propylbiphenyl-4-yl)boronic acid (**11\_Pr**).

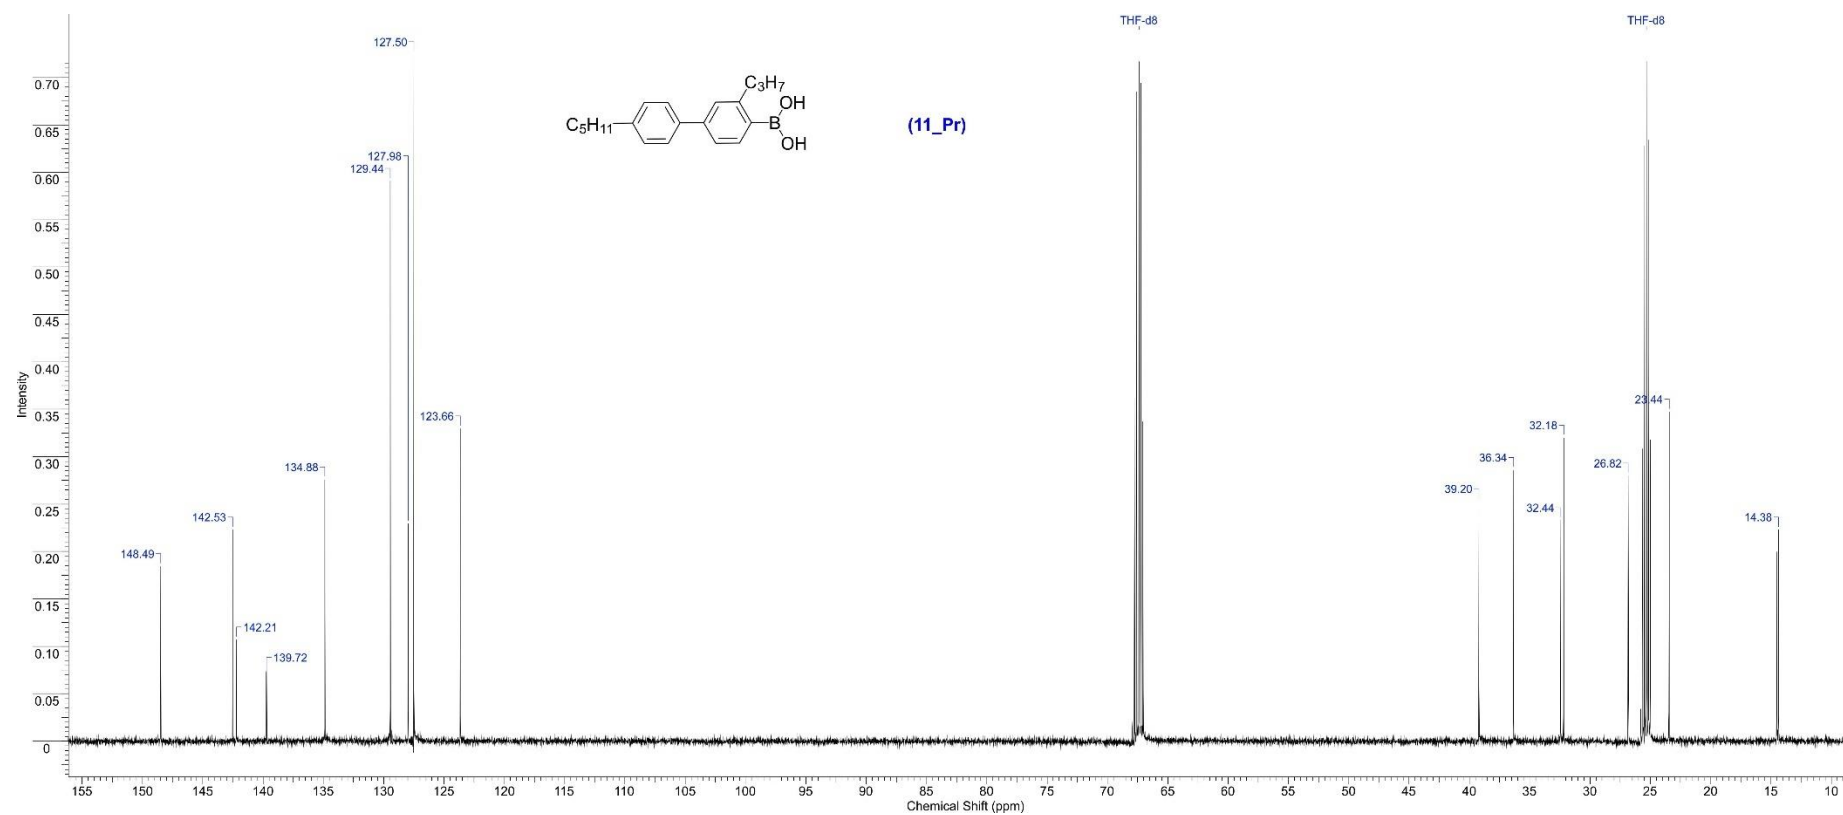

Figure S8. <sup>13</sup>C NMR of (4'-pentyl-3-propylbiphenyl-4-yl)boronic acid (**11\_Pr**).

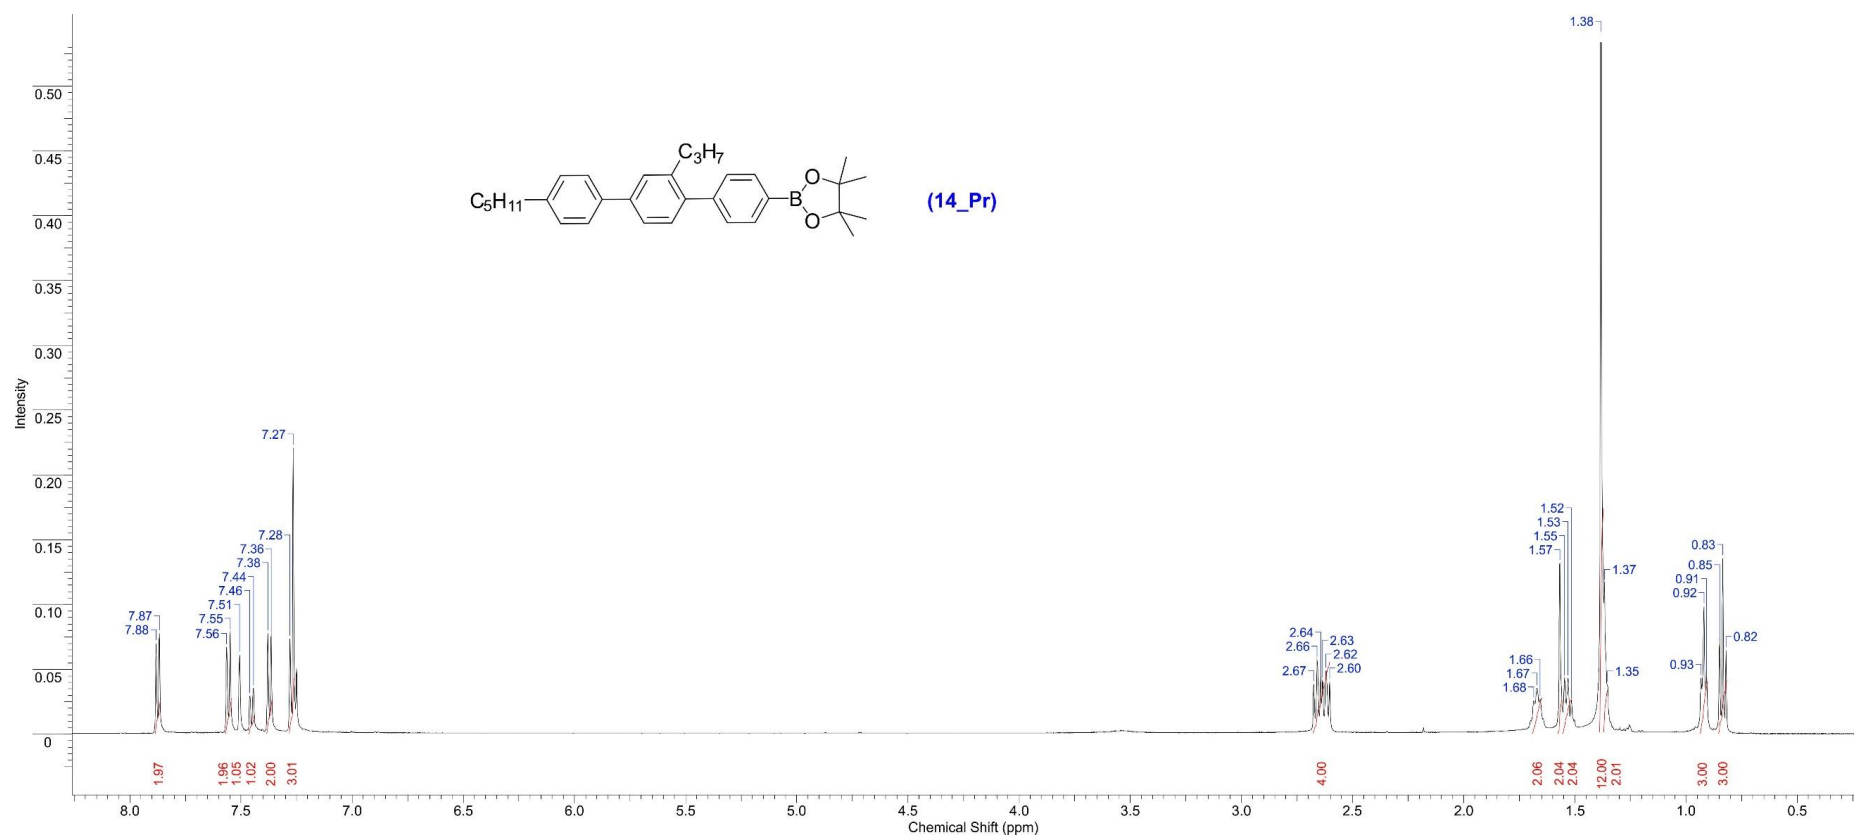

Figure S9. <sup>1</sup>H NMR of 4,4,5,5-tetramethyl-2-(4''-pentyl-2'-propyl-1,1':4',1''-terphenyl-4-yl)-1,3,2-dioxaborolane (**14\_Pr**).

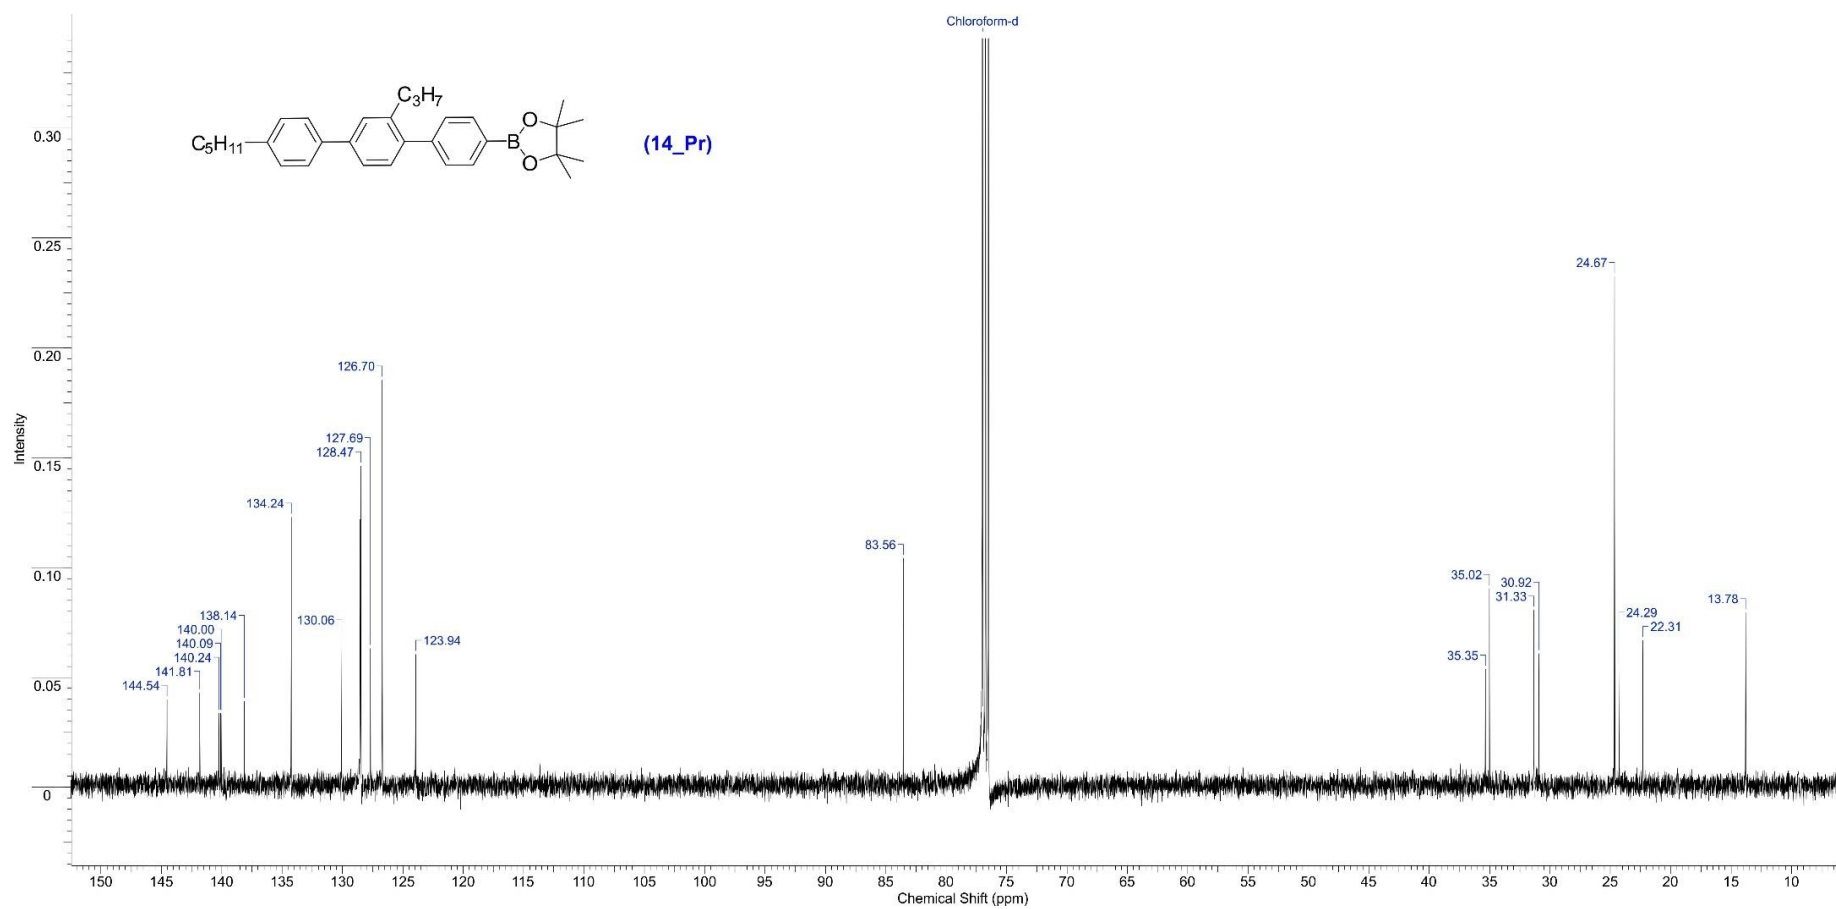

Figure S10. <sup>13</sup>C NMR of 4,4,5,5-tetramethyl-2-(4''-pentyl-2'-propyl-1,1':4',1''-terphenyl-4-yl)-1,3,2-dioxaborolane (**14\_Pr**).

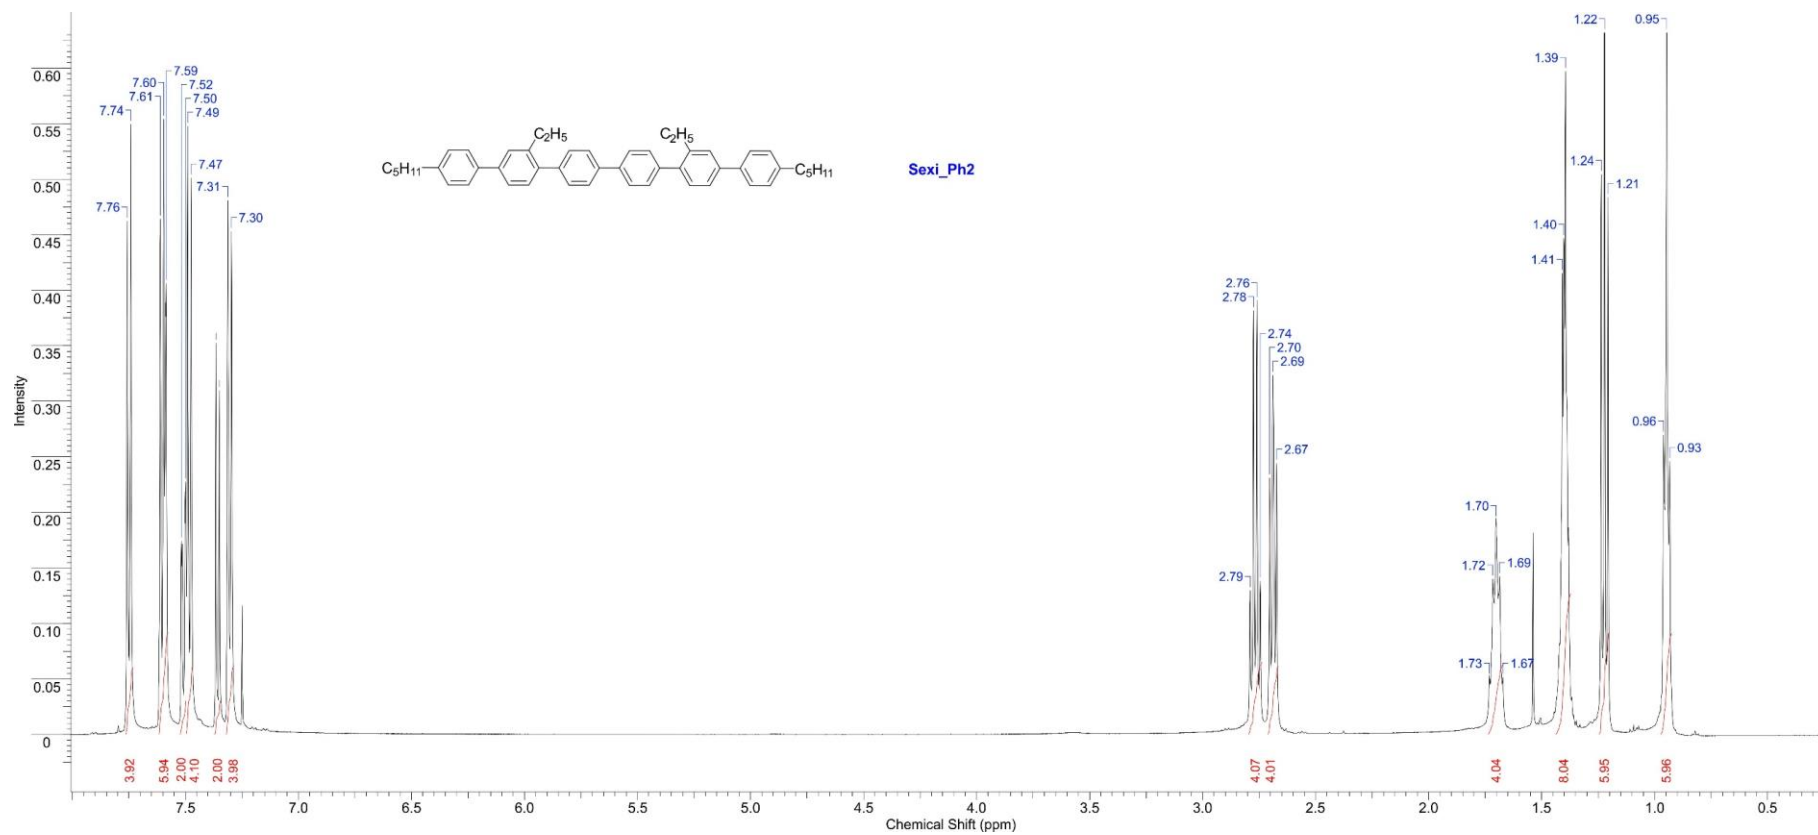

Figure S11. <sup>1</sup>H NMR of Sexi\_Ph2.



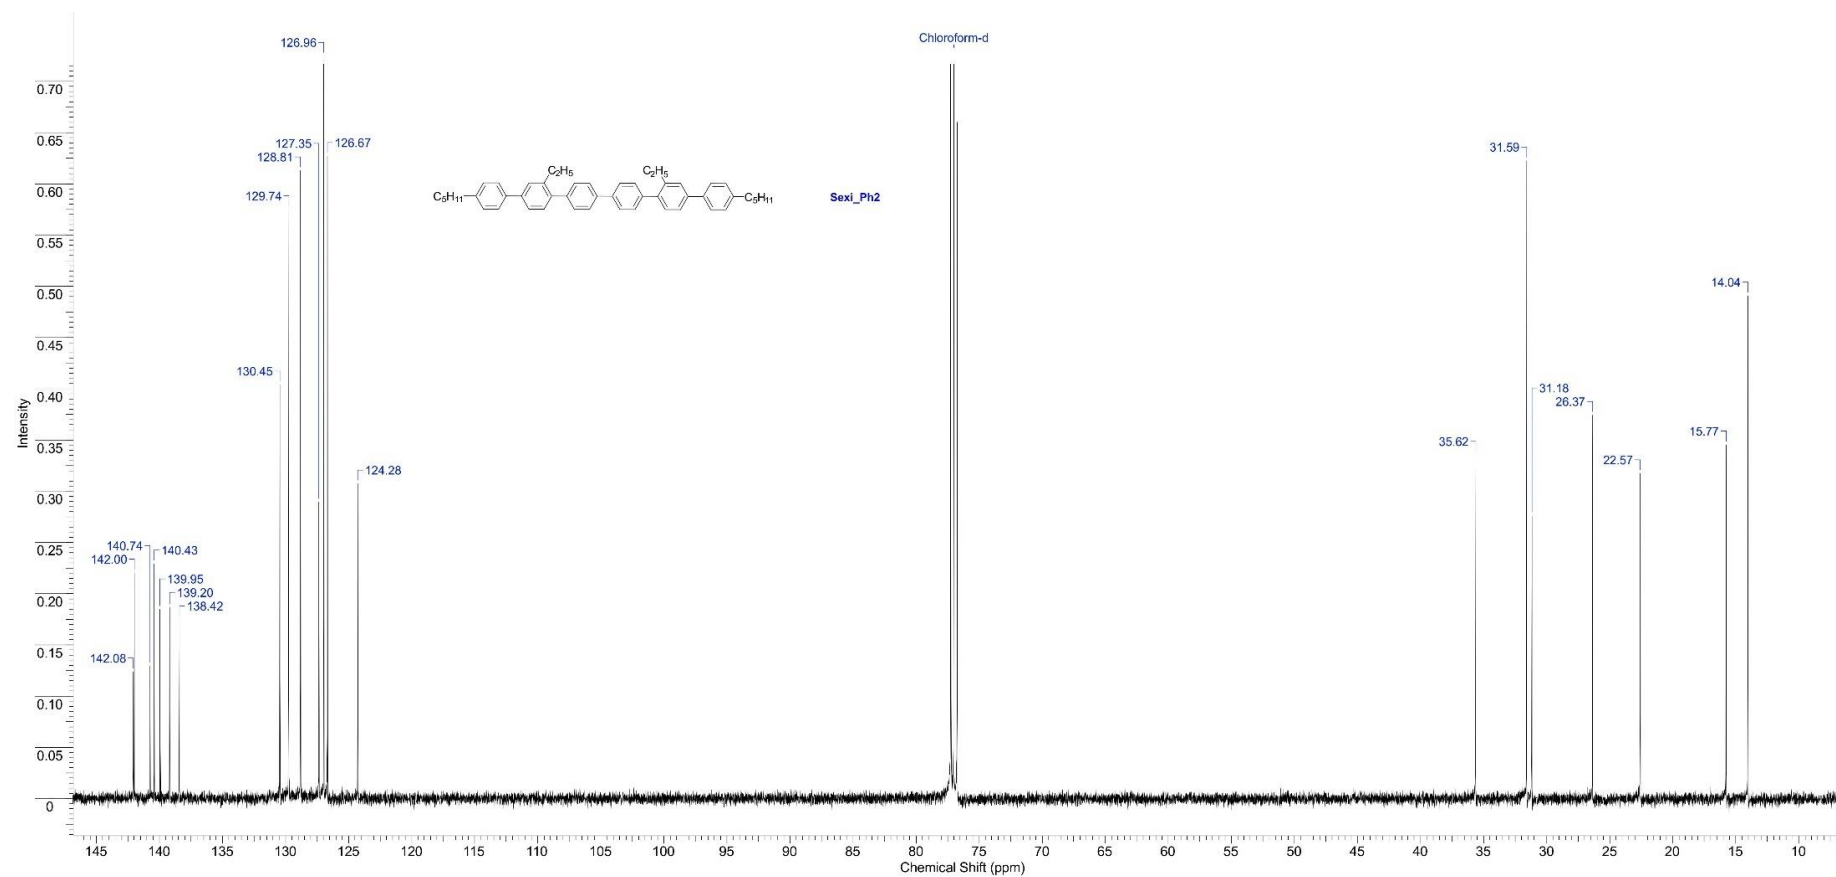

Figure S12. <sup>13</sup>C NMR of Sexi\_Ph2.

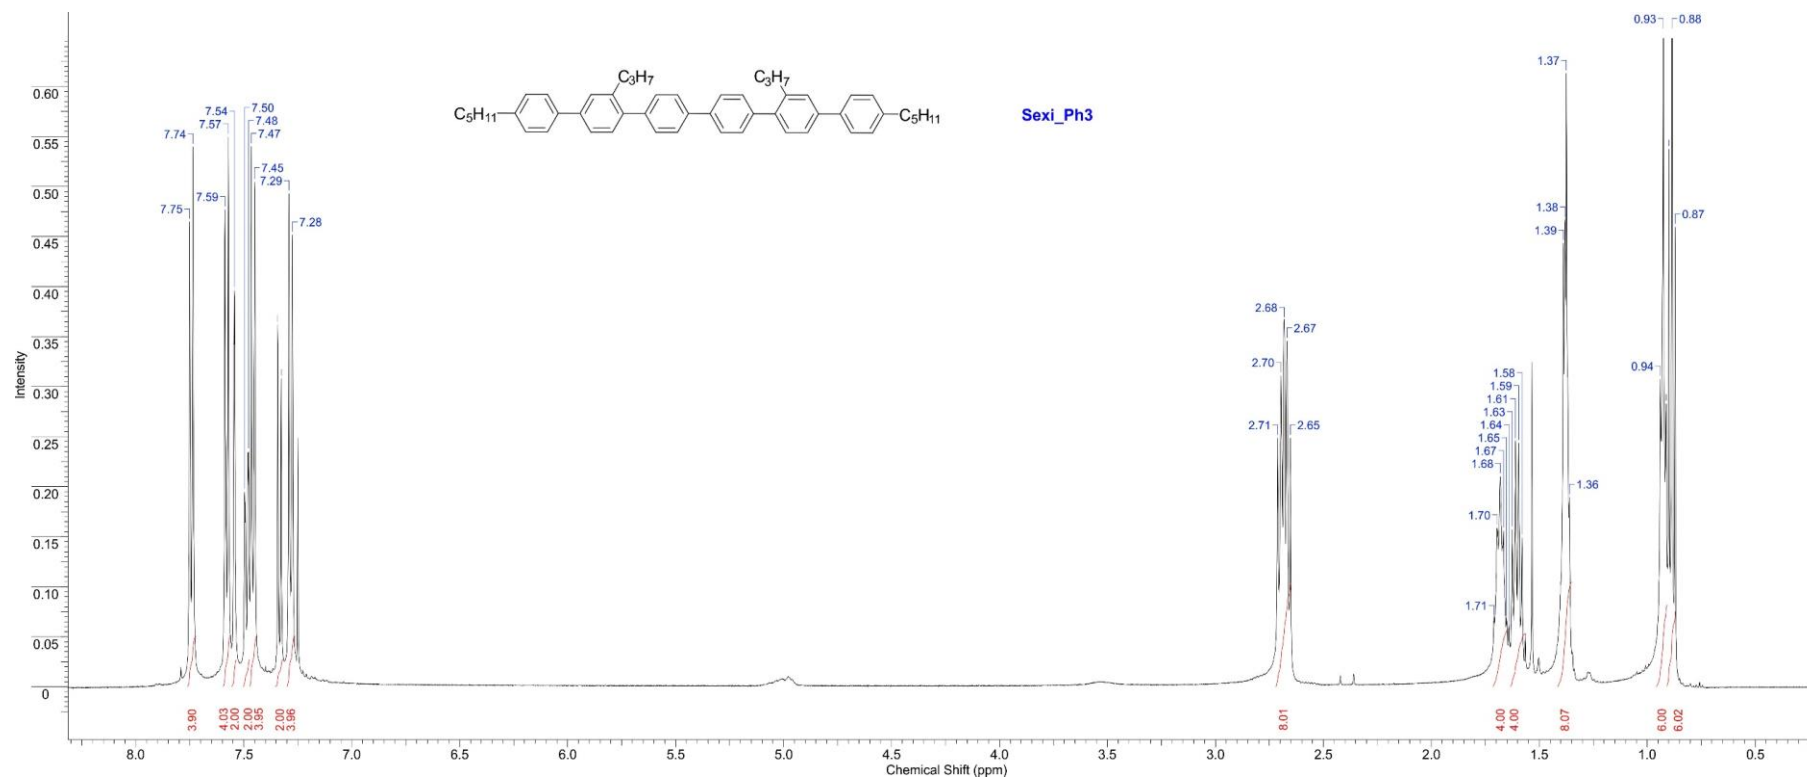

Figure S13. <sup>1</sup>H NMR of Sexi\_Ph3.

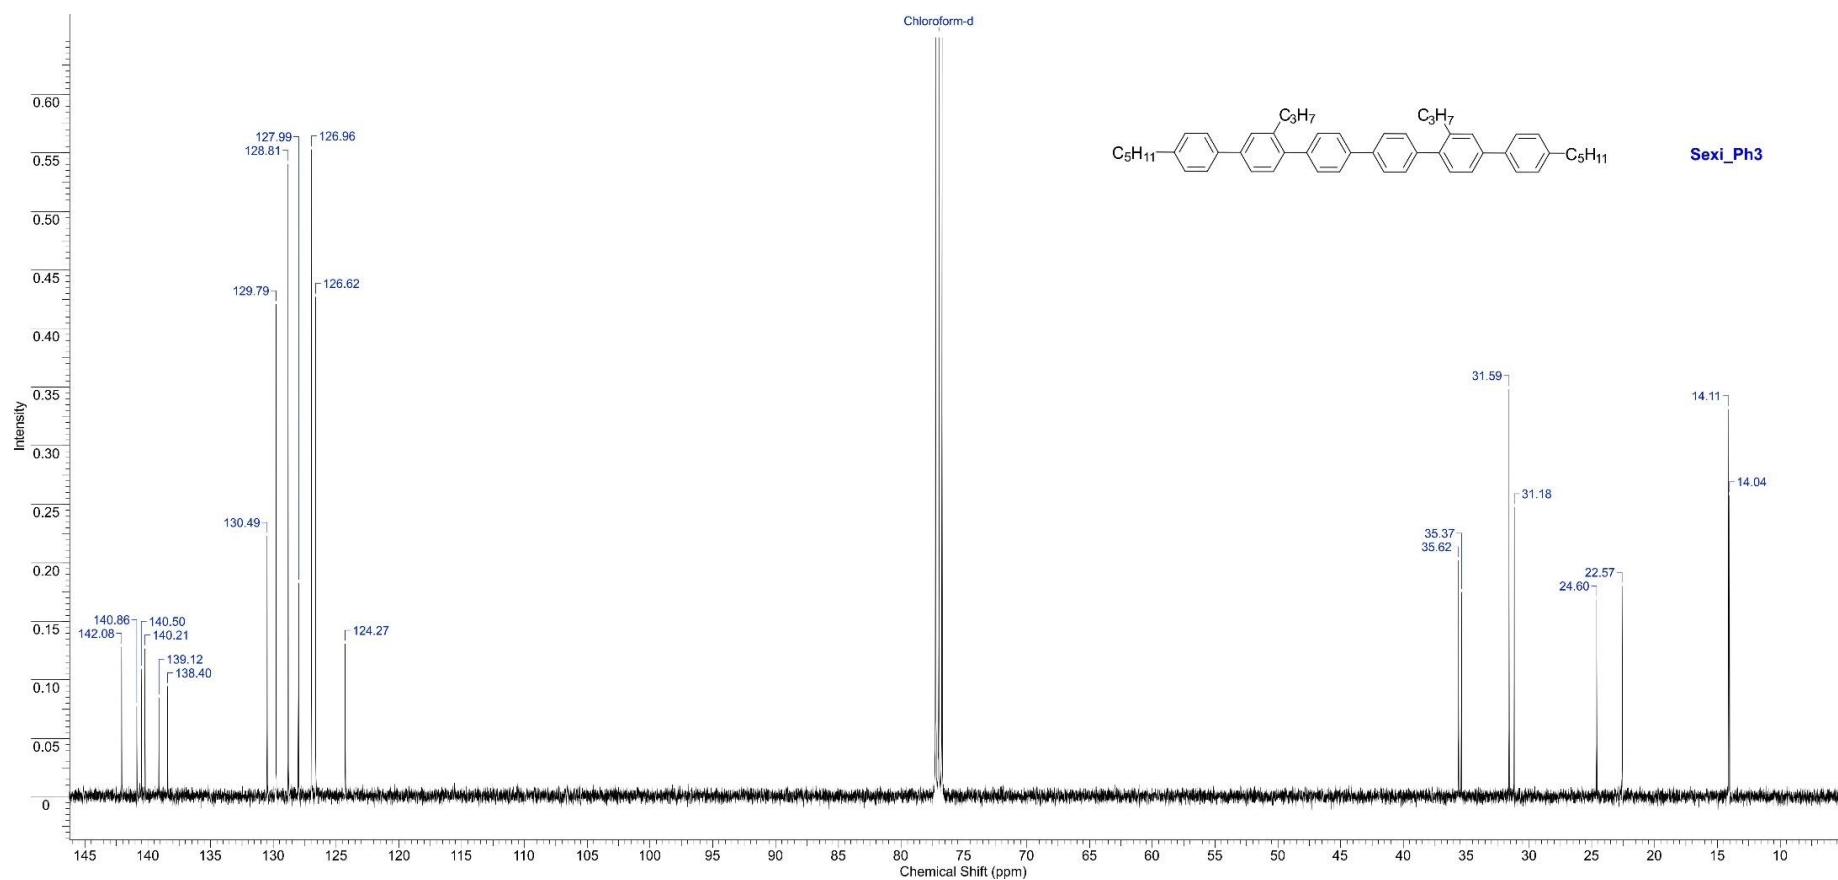

Figure S14. 13C NMR of Sexi\_Ph3.

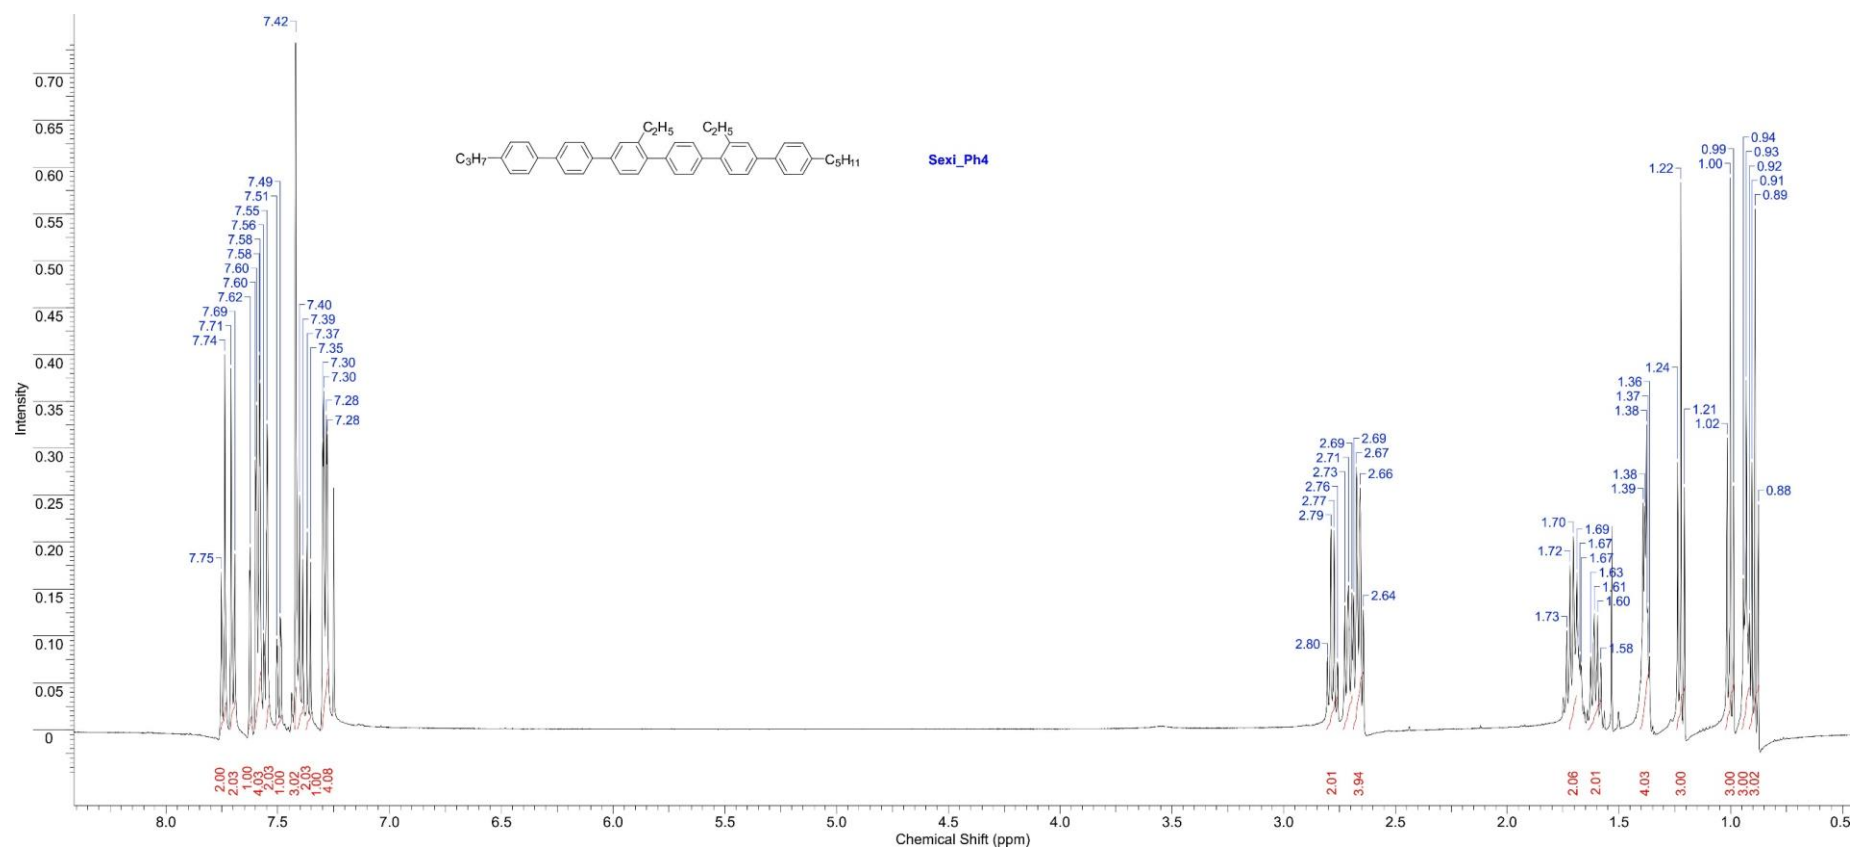

Figure S15. <sup>1</sup>H NMR of **Sexi\_Ph4**.

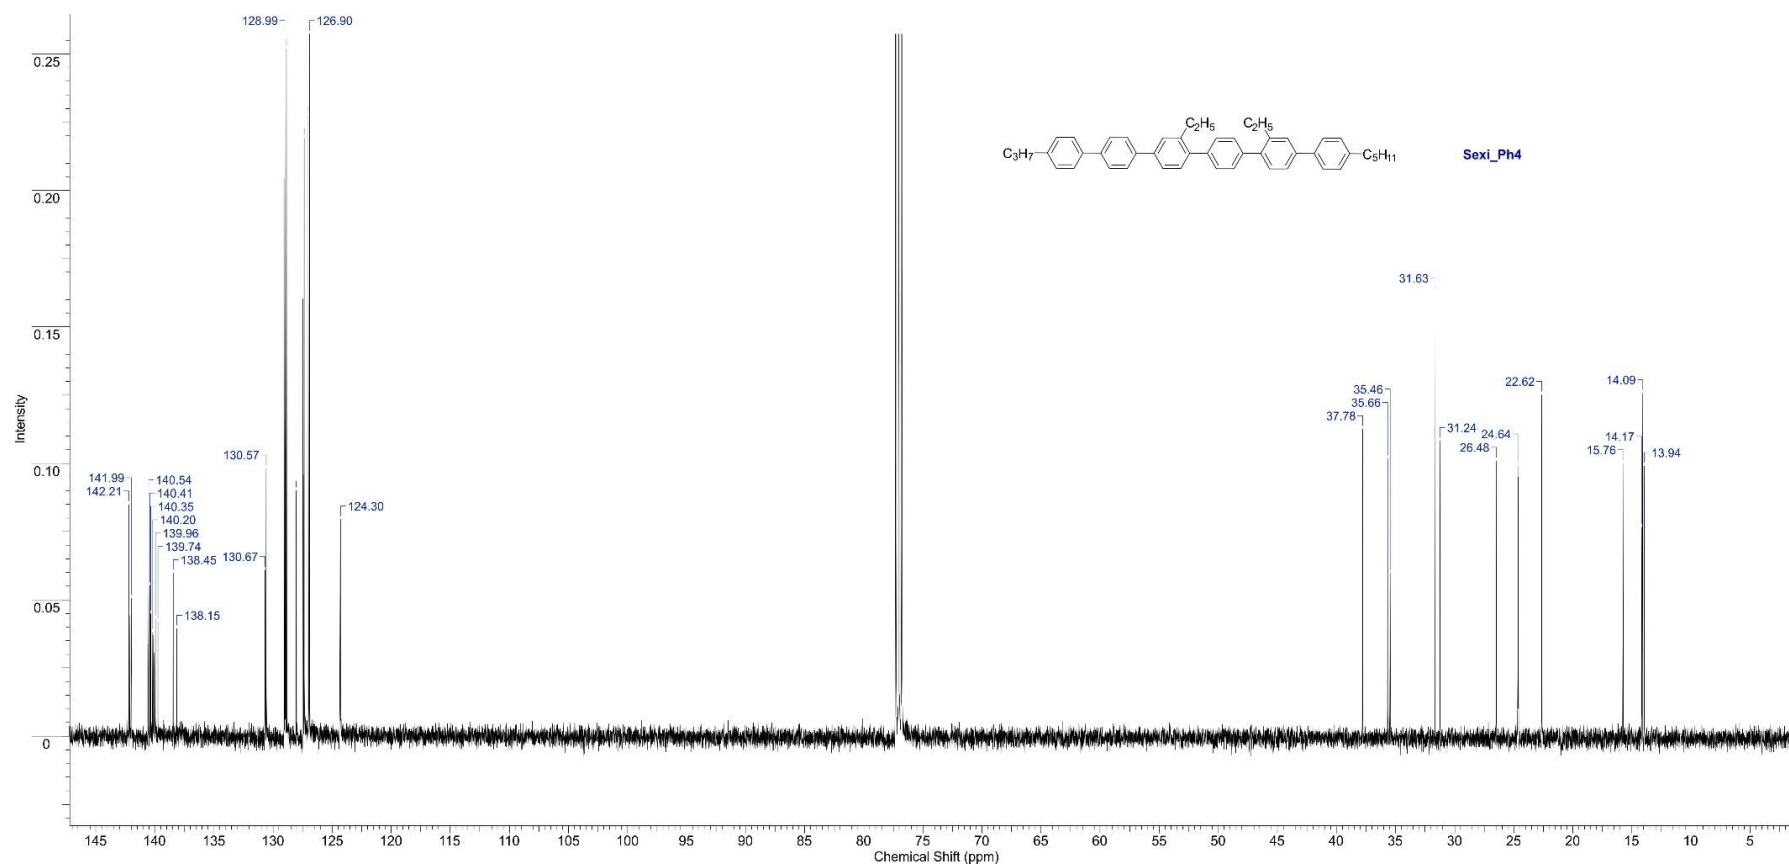

Figure S16. <sup>13</sup>C NMR of **Sexi\_Ph4**.

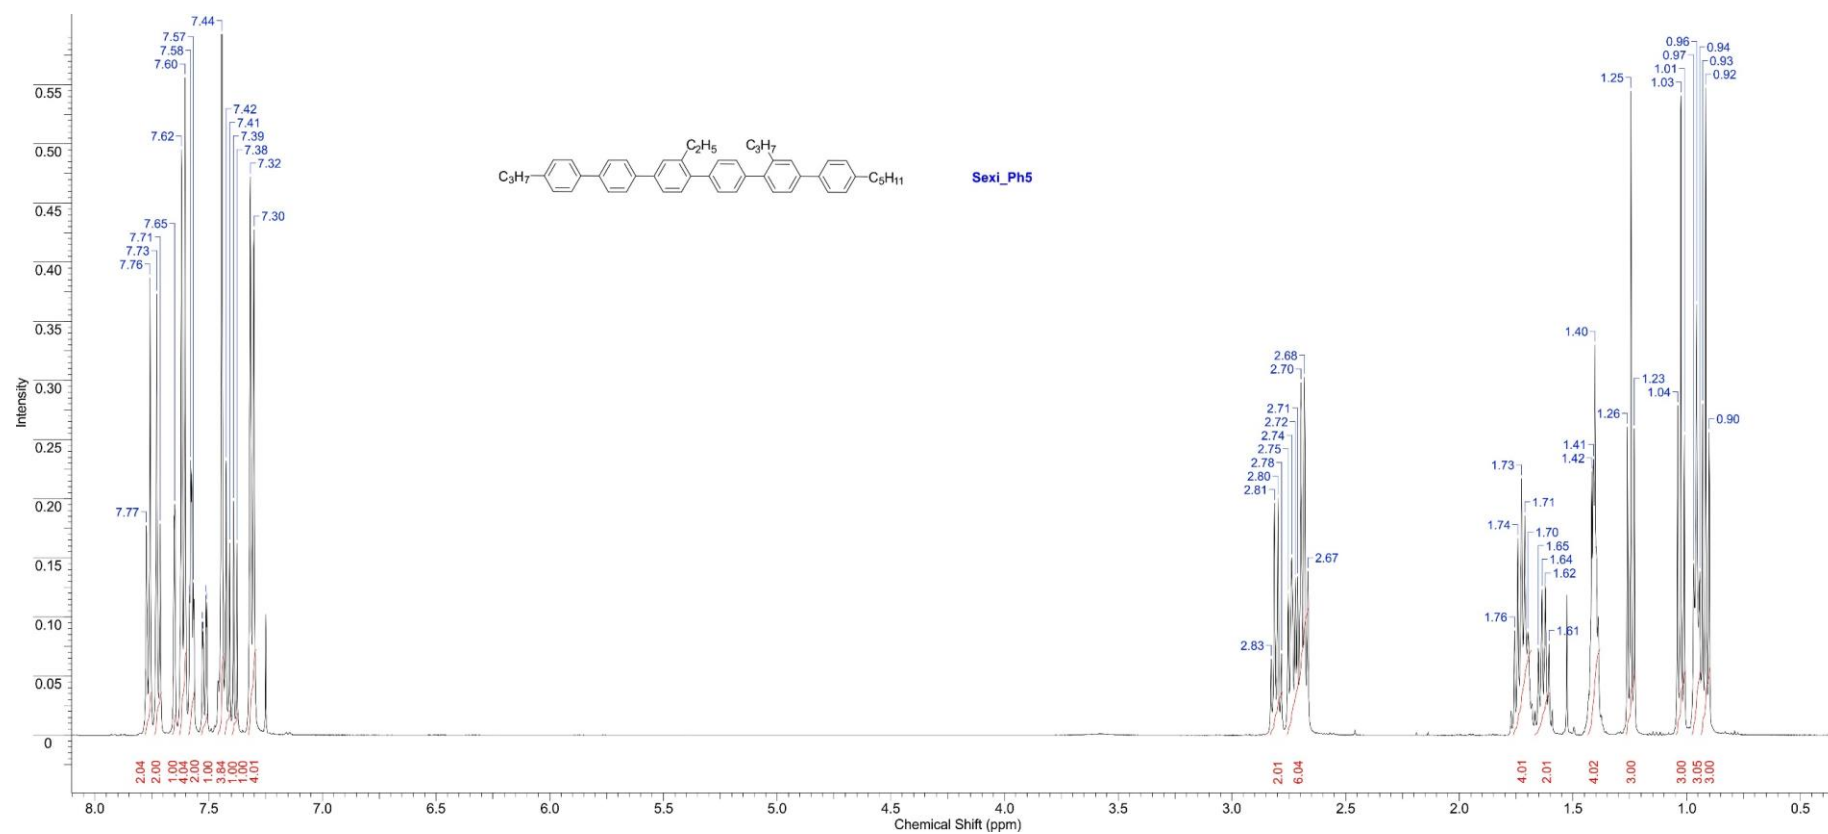

Figure S17. <sup>1</sup>H NMR of Sexi\_Ph5.

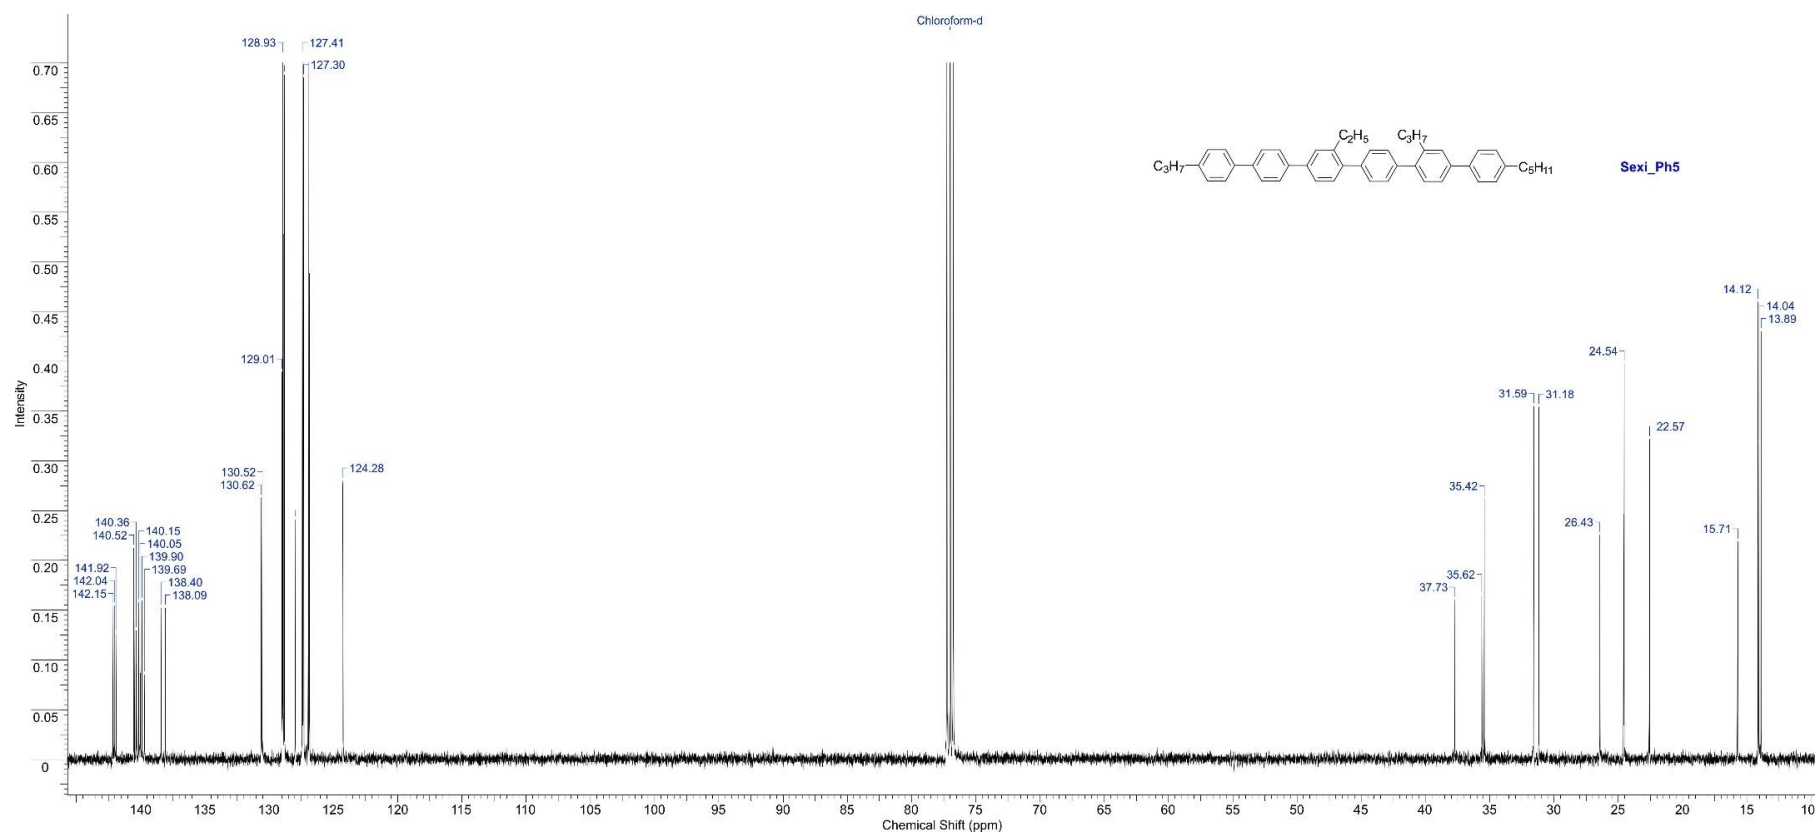

Figure S18. <sup>13</sup>C NMR of **Sexi\_Ph5**.

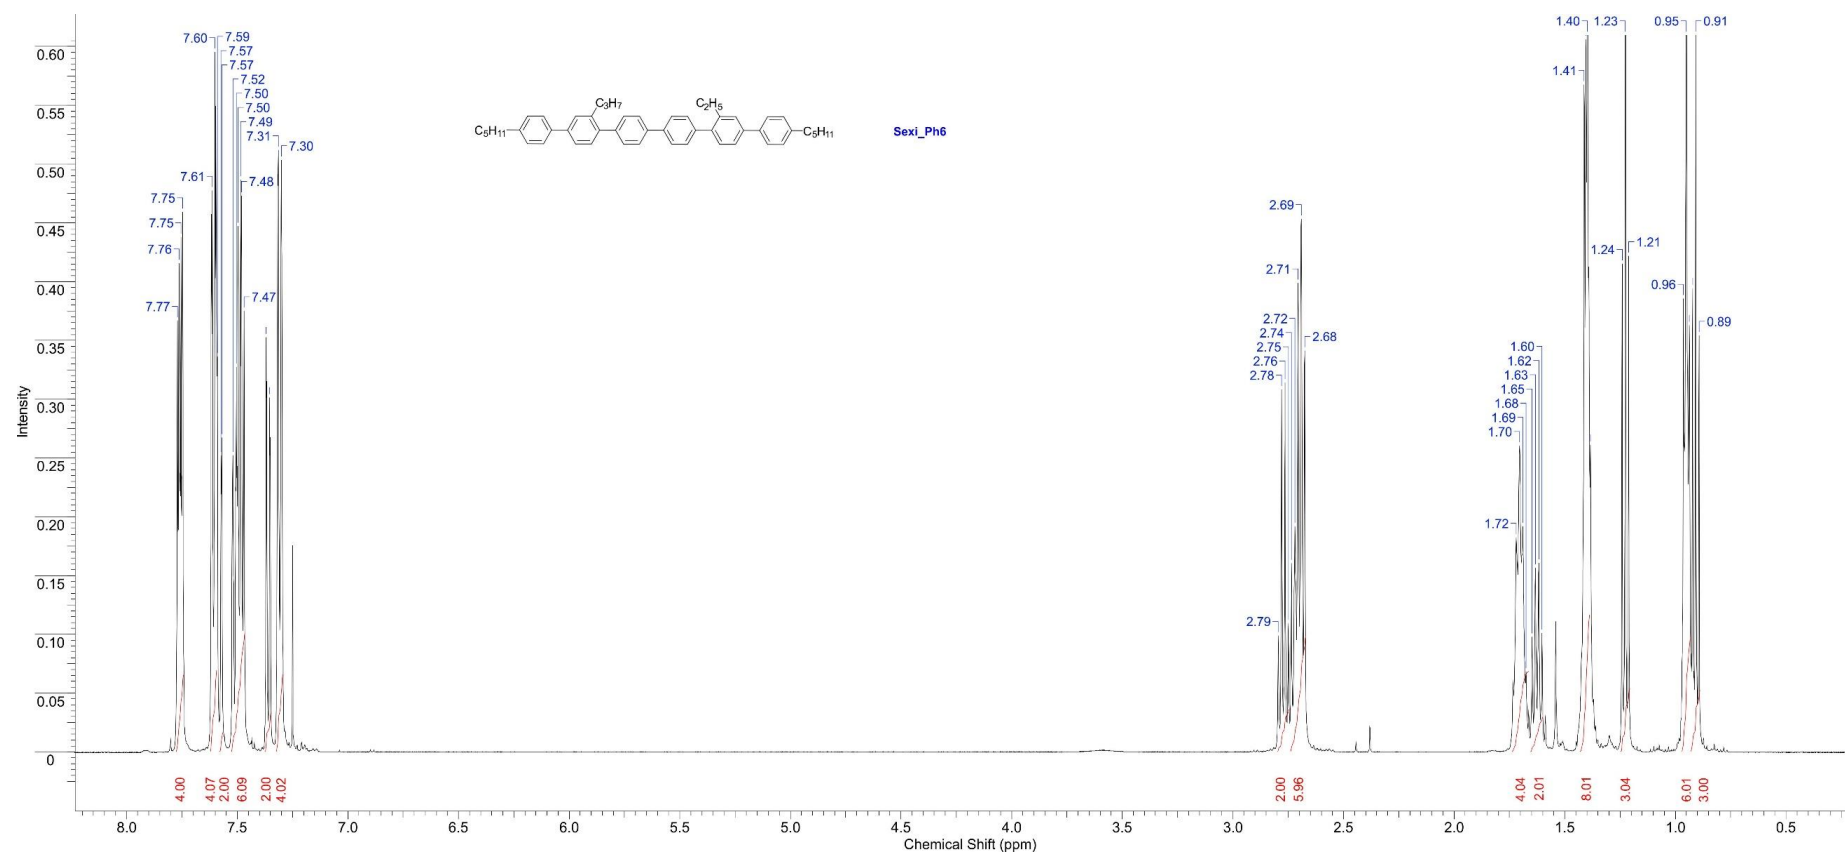

Figure S19. 1H NMR of Sexi\_Ph6.



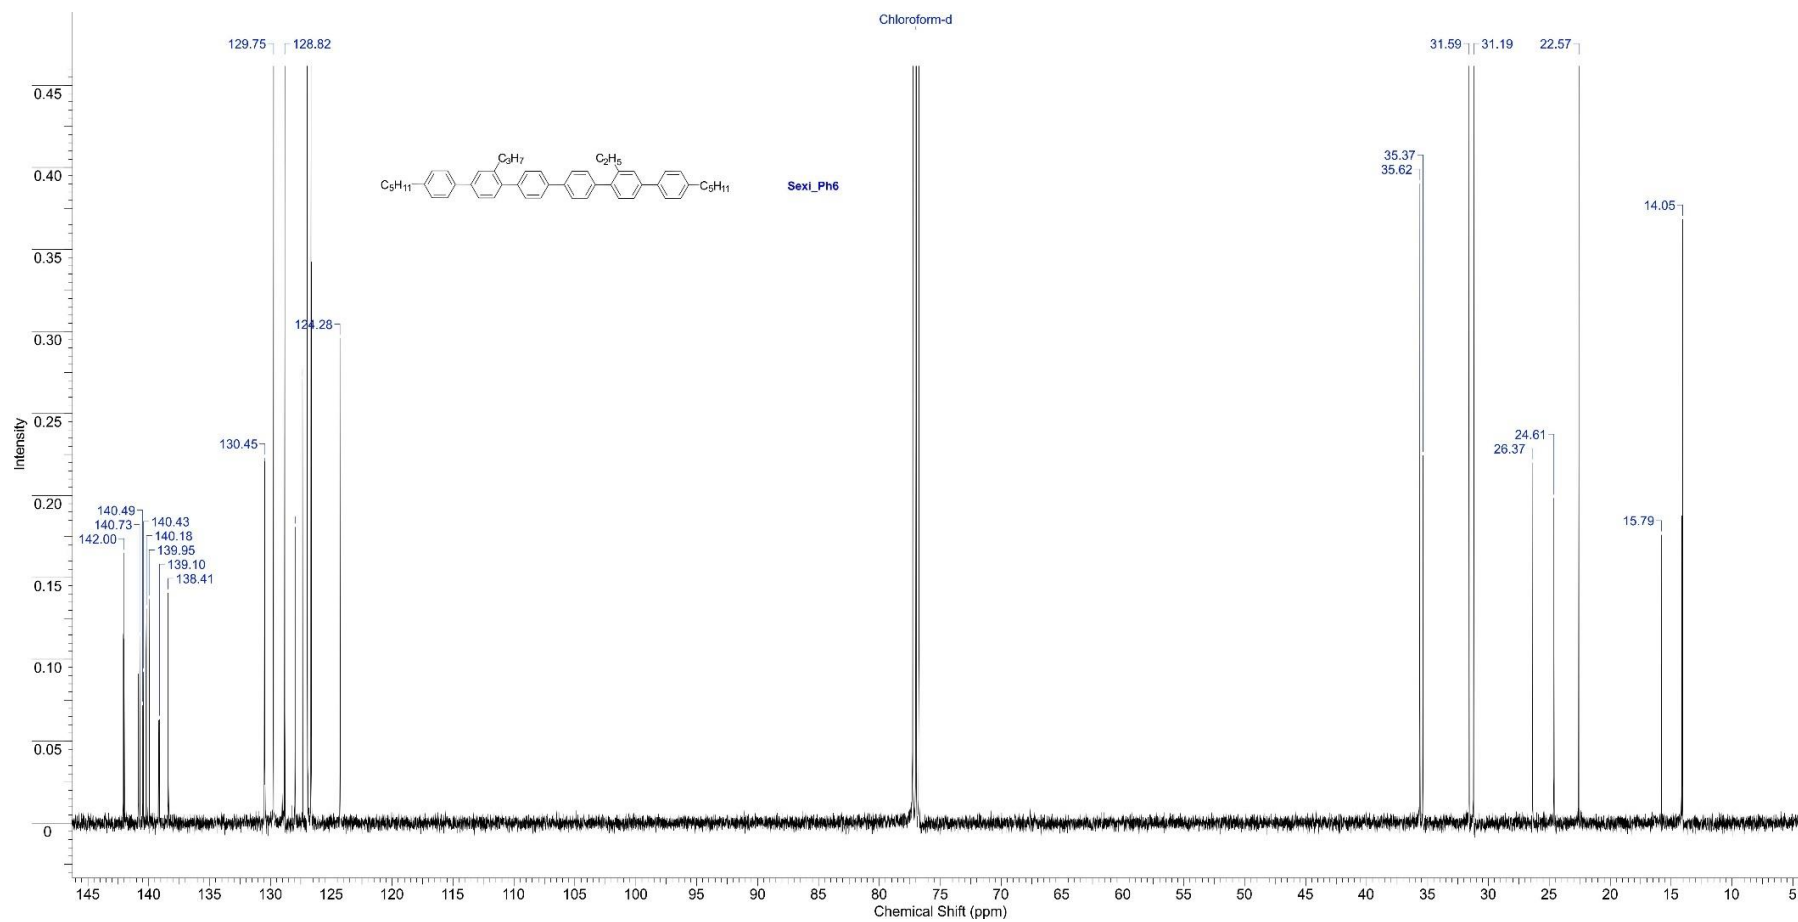

Figure S20.  $^{13}\text{C}$  NMR of Sexi\_Ph6.

### 3. Mass Spectrum MS(EI) data

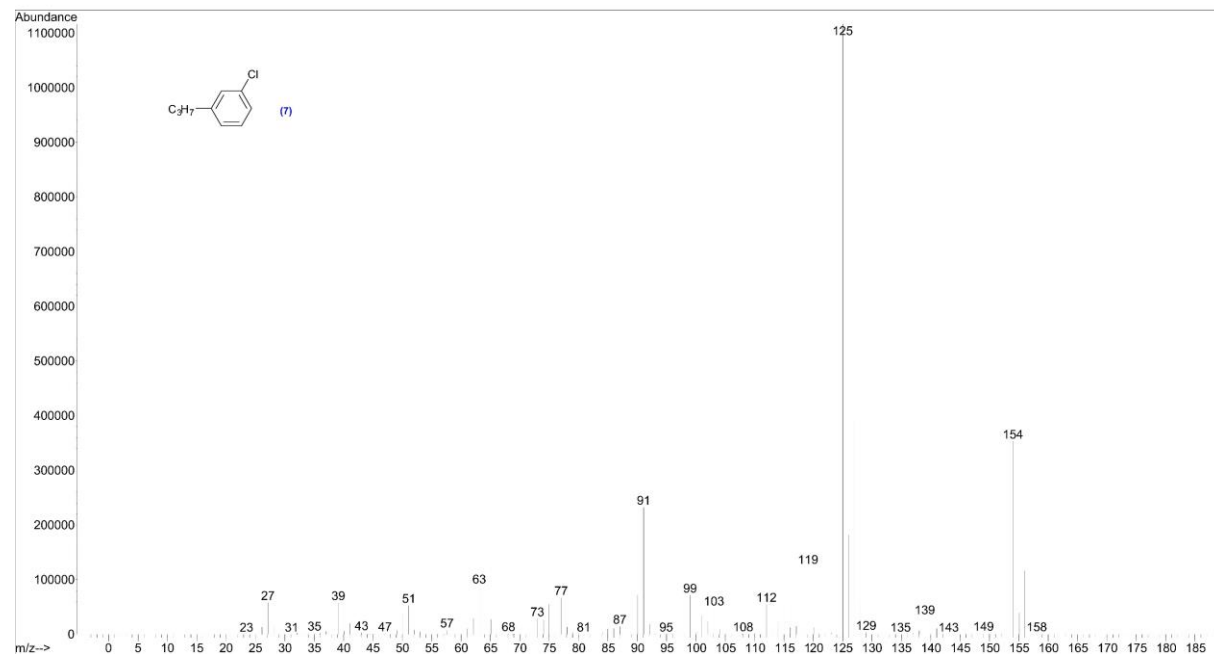

Figure S21. MS spectrum of 1-chloro-3-propylbenzene (7).

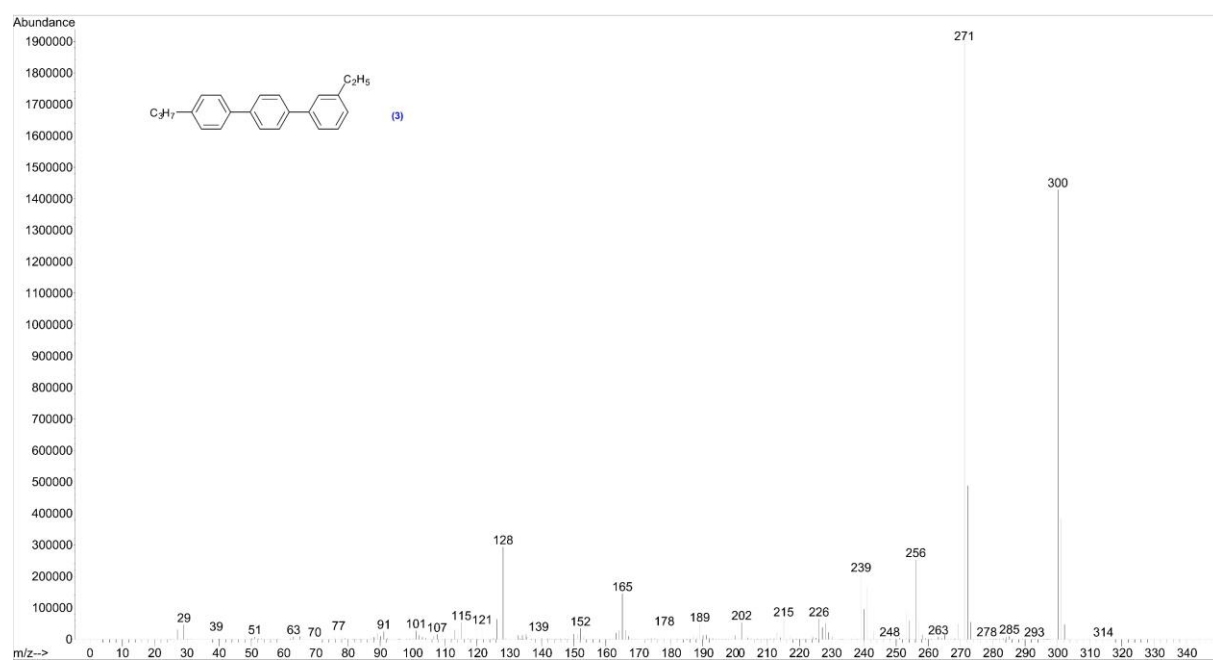

Figure S22. MS spectrum of 3-ethyl-4''-propylterphenyl (**3**).

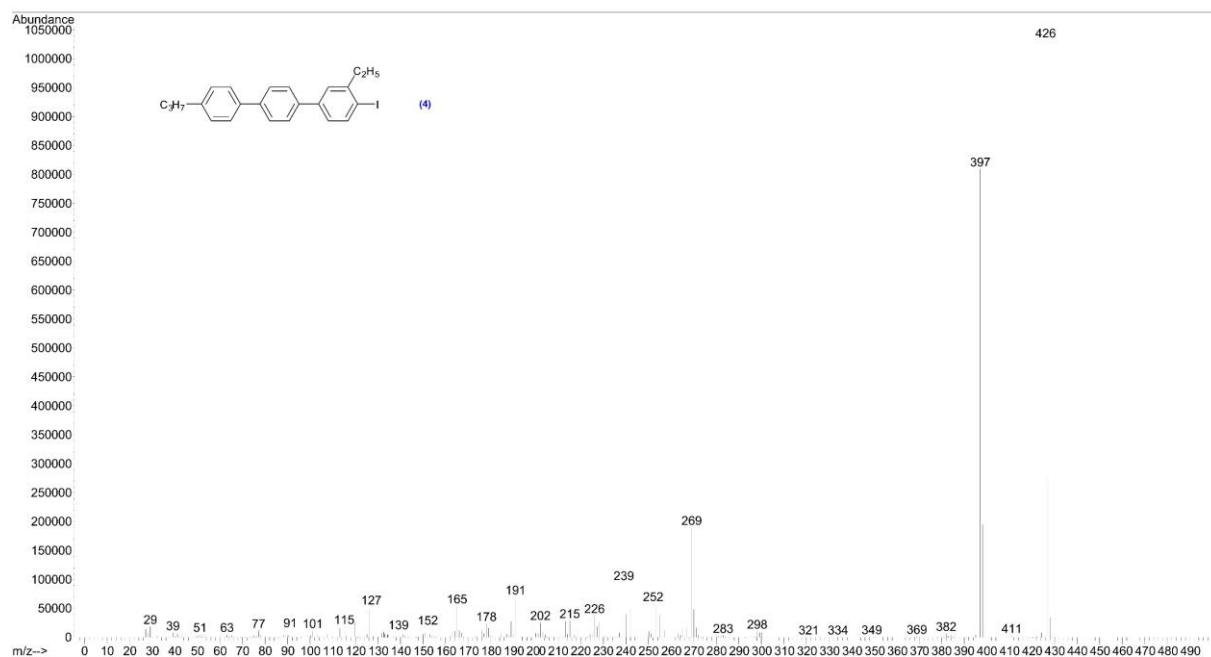

Figure S23. MS spectrum of 4-iodo-3-ethyl-4''-propylterphenyl (4).

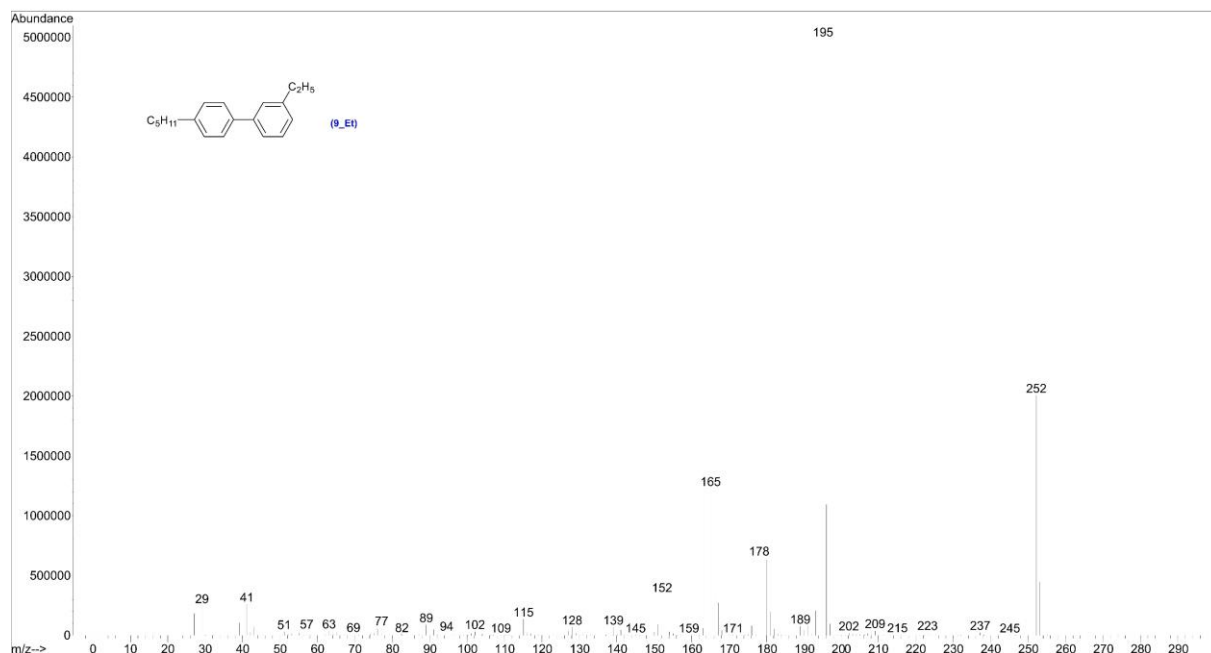

Figure S24. MS spectrum of 4'-pentyl-3-ethylbiphenyl (9\_Et).

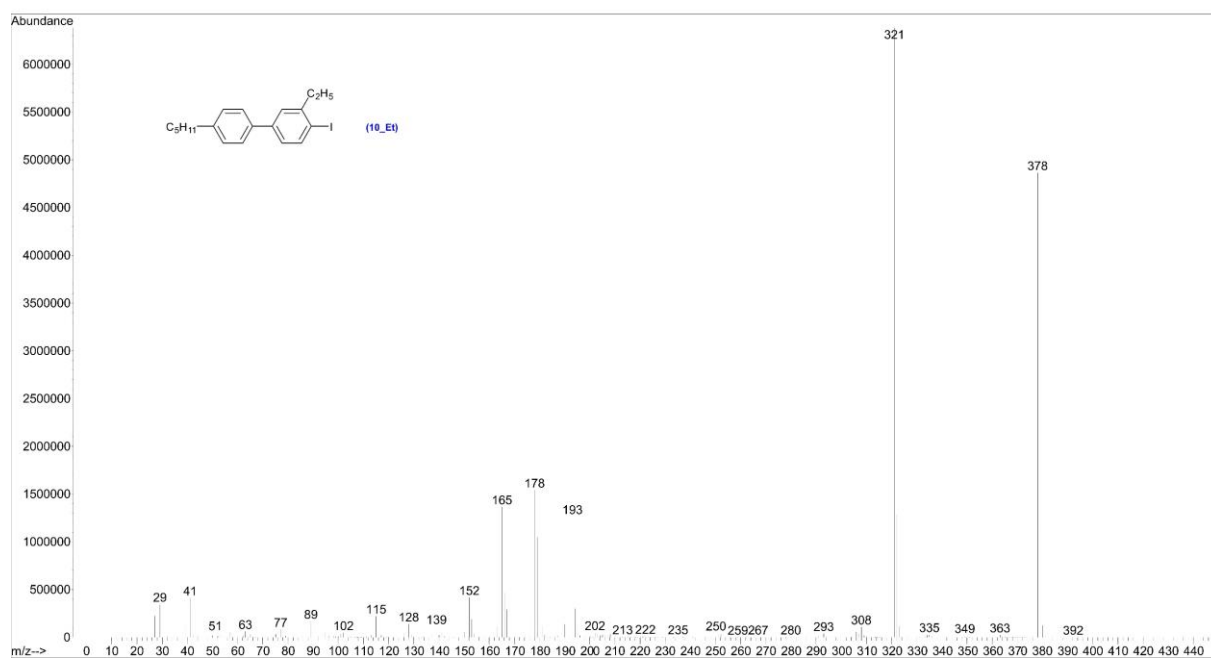

Figure S25. MS spectrum of 4-iodo-4'-pentyl-3-ethylbiphenyl (**10\_Et**).

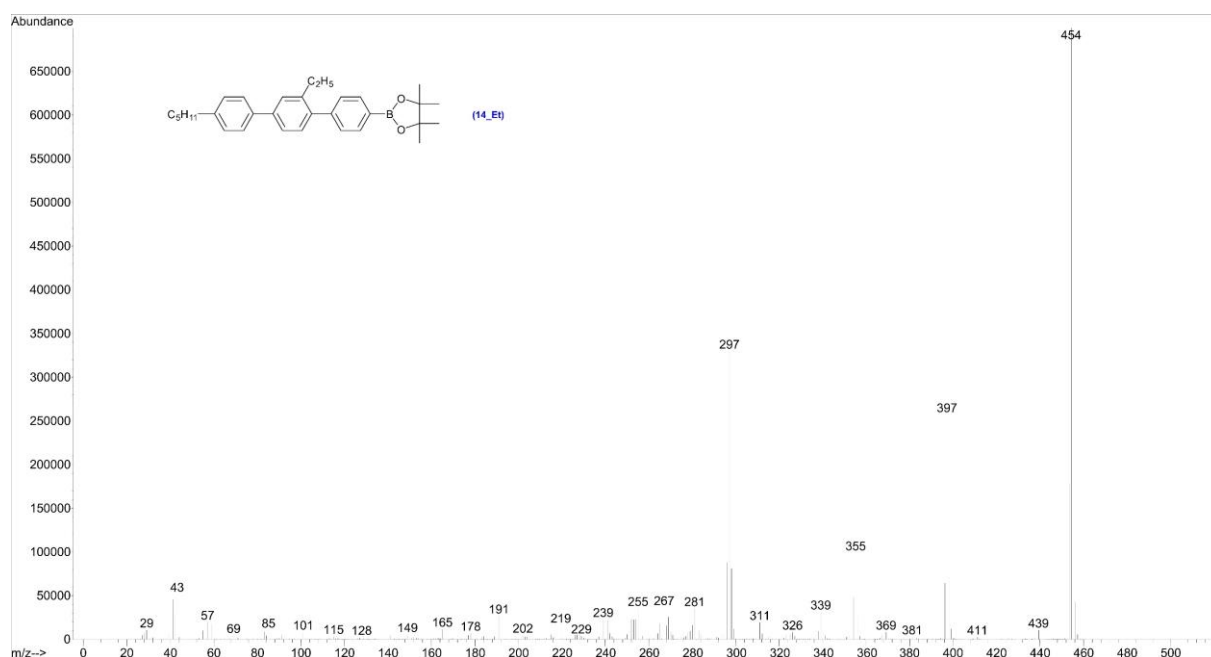

Figure S26. MS spectrum of 4,4,5,5-tetramethyl-2-(4''-pentyl-2'-ethyl-1,1':4',1''-terphenyl-4-yl)-1,3,2-dioxaborolane (**14\_Et**)

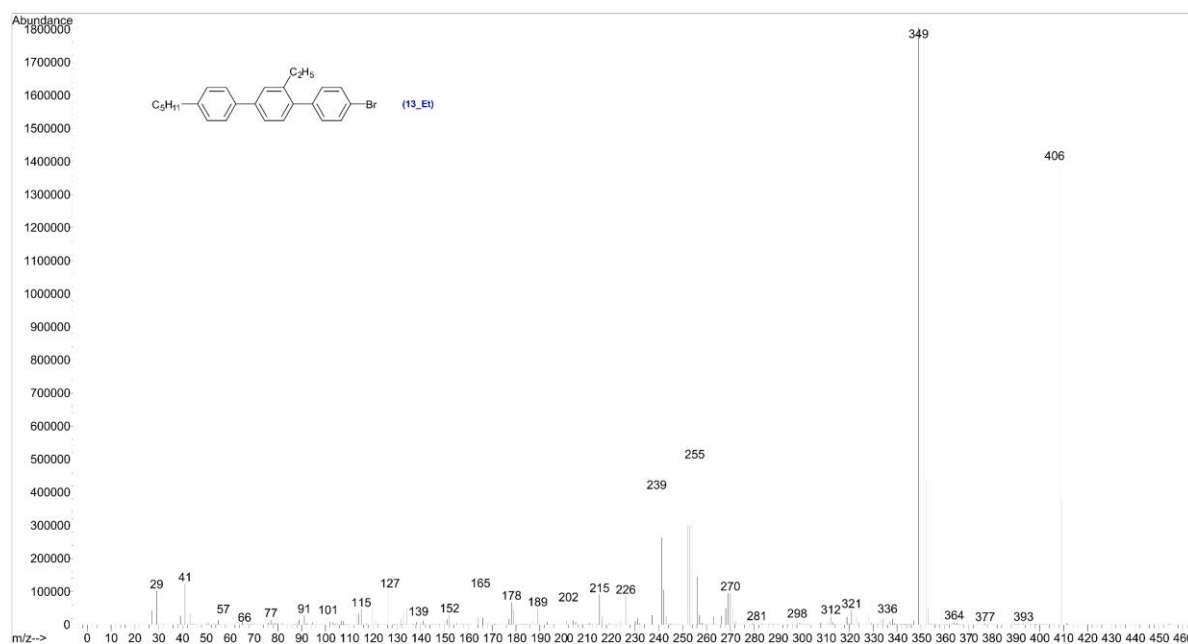

Figure S27. MS spectrum of 4-bromo-2'-ethyl-4''-pentyl-1,1':4',1''-terphenyl (**13\_Et**).

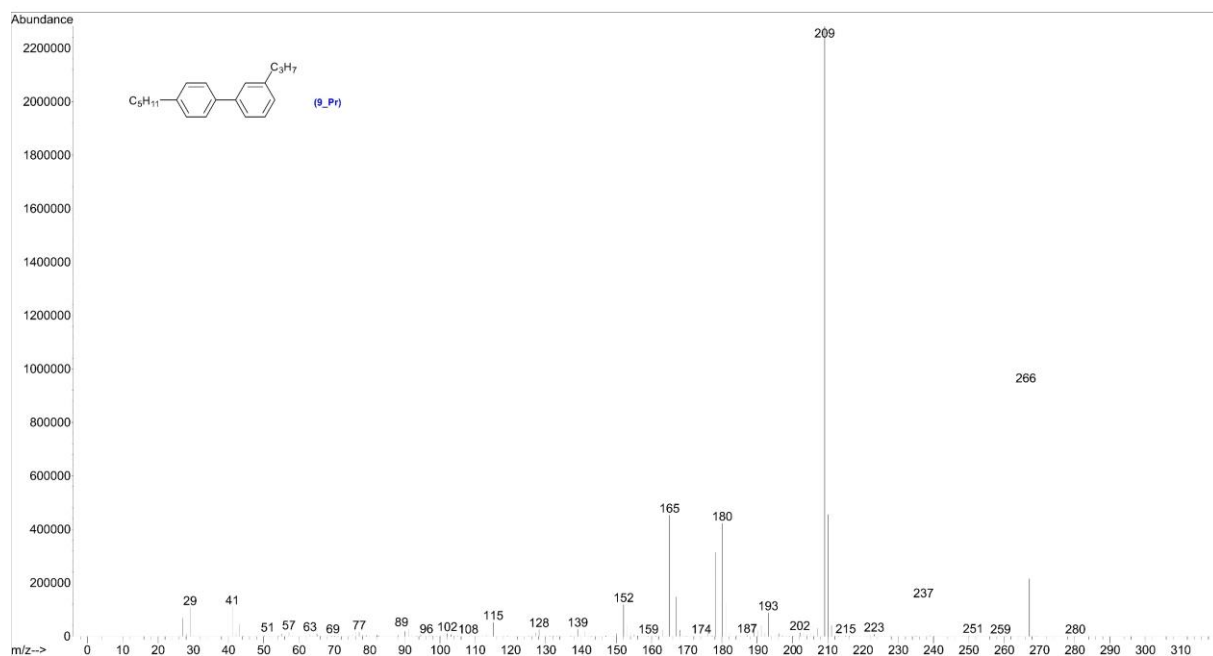

Figure S28. MS spectrum of 4'-pentyl-3-propylbiphenyl (**9\_Pr**).

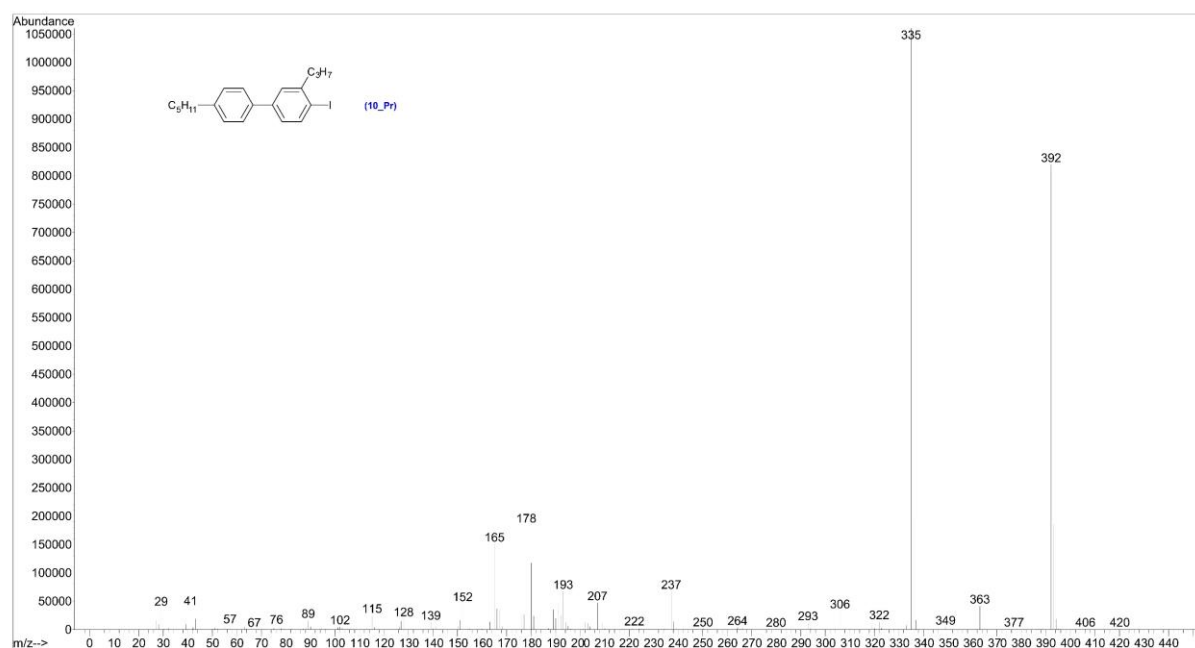

Figure S29. MS spectrum of 4-iodo-4'-pentyl-3-propylbiphenyl (**10\_Pr**).

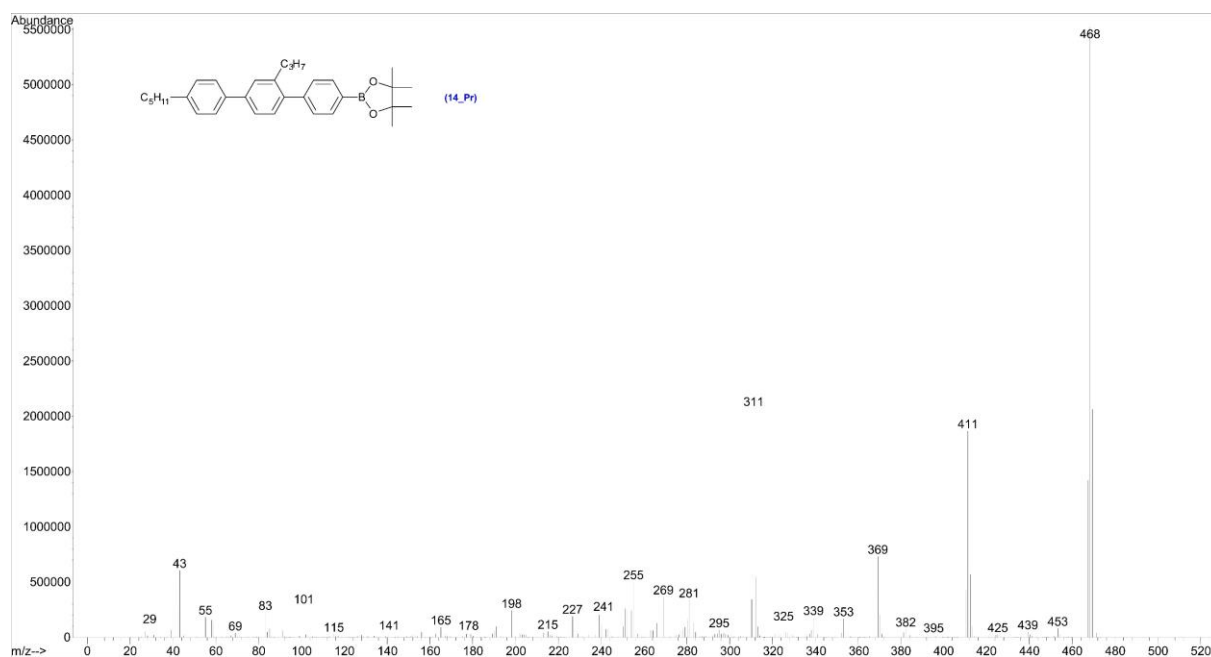

Figure S30. MS spectrum of 4,4,5-tetramethyl-2-(4''-pentyl-2'-propyl-1,1':4,1''-terphenyl-4-yl)-1,3,2-dioxaborolane (**14\_Pr**)

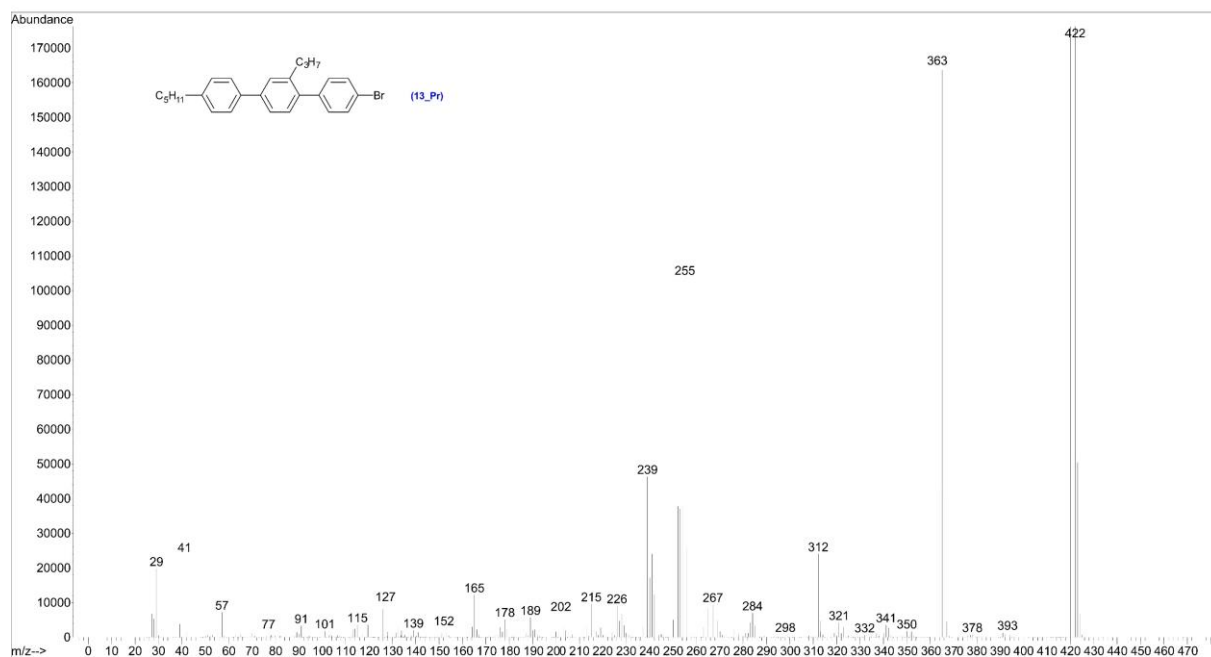

Figure S31. MS spectrum of 4-bromo-2'-propyl-4''-pentyl-1,1':4',1''-terphenyl (**13\_Pr**).

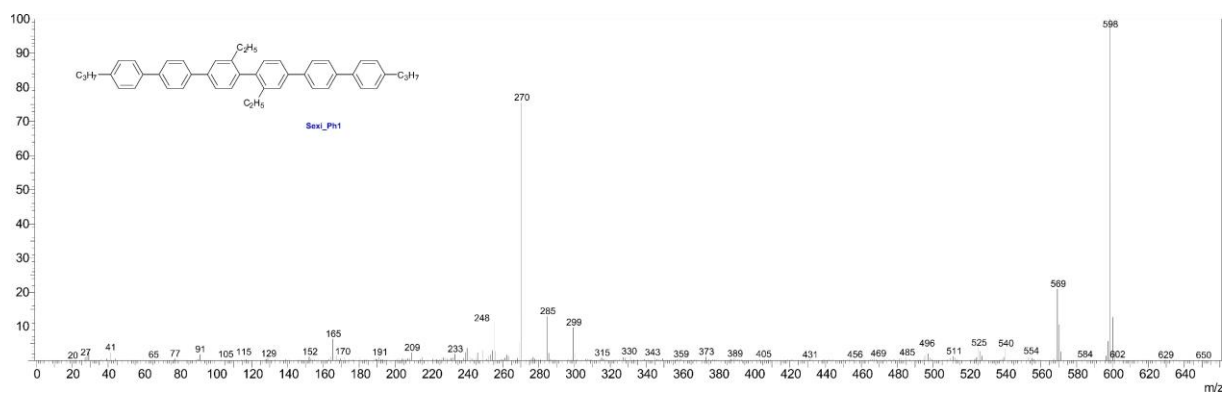

Figure S32. MS spectrum of Sexi\_Ph1.

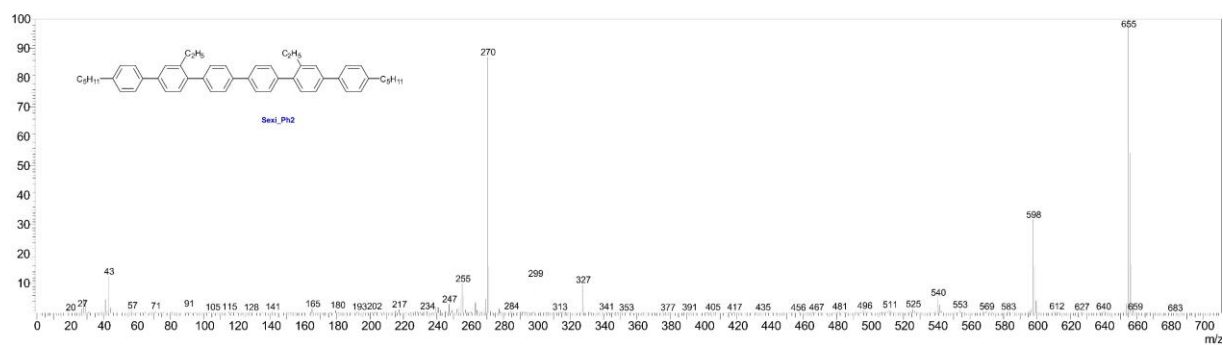

Figure S33. MS spectrum of Sexi\_Ph2.



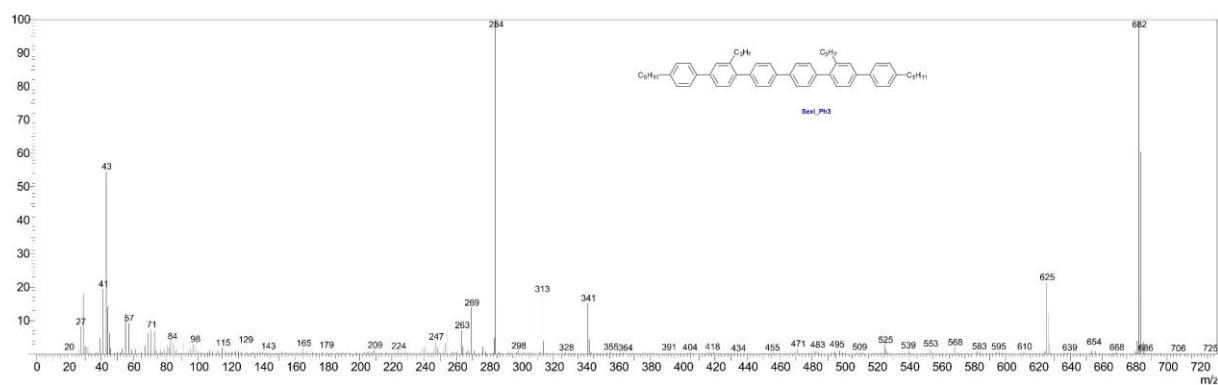

Figure S34. MS spectrum of Sexi\_Ph3.

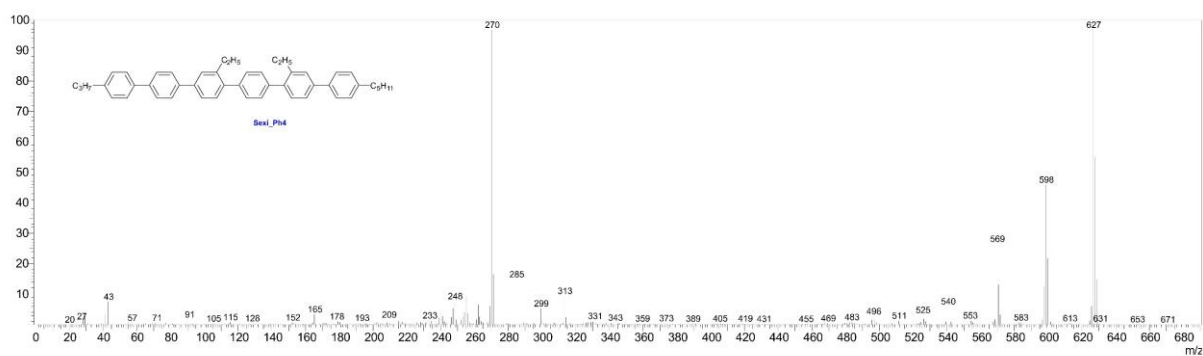

Figure S35. MS spectrum of Sexi\_Ph4.

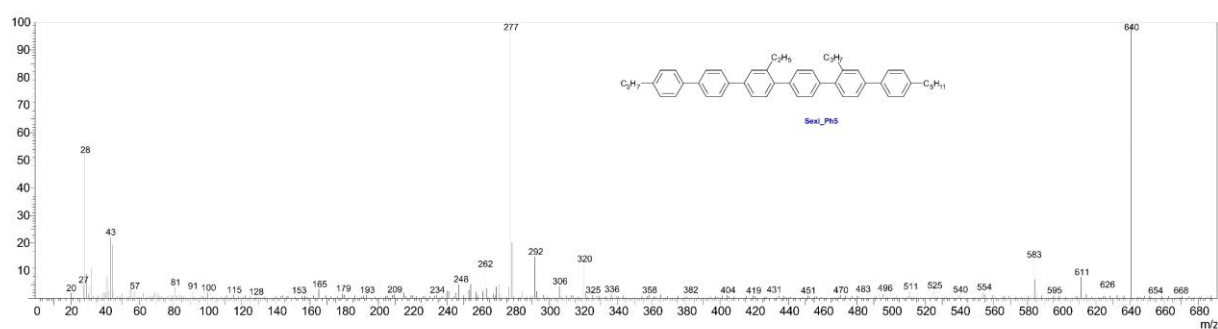

Figure S36. MS spectrum of Sexi\_Ph5.

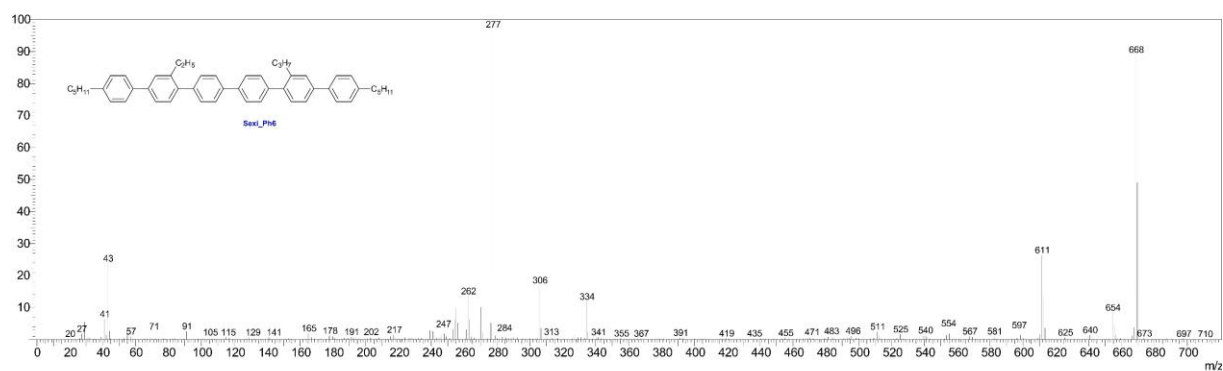

Figure S37. MS spectrum of **Sexi\_Ph6**.

#### 4. Differential scanning calorimetry (DSC) data

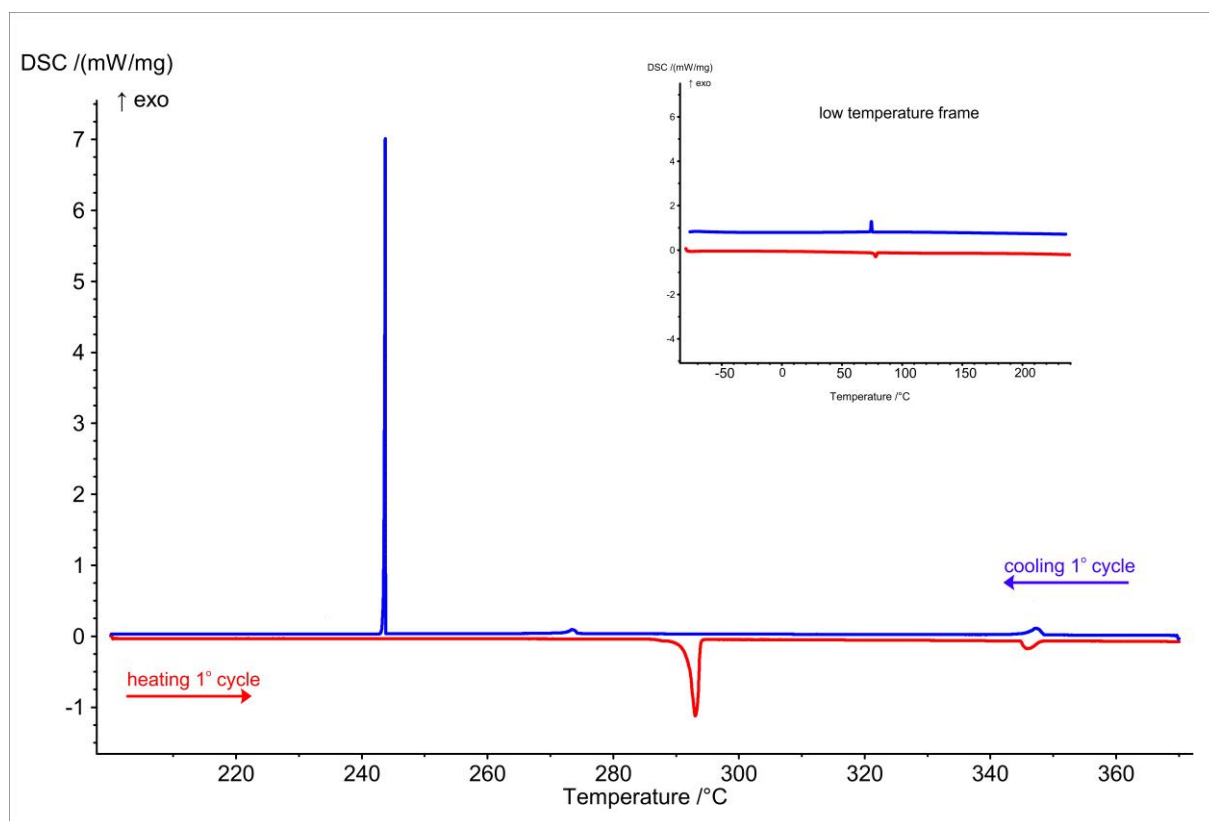

Figure S38. DSC of Sexi\_Ph1.

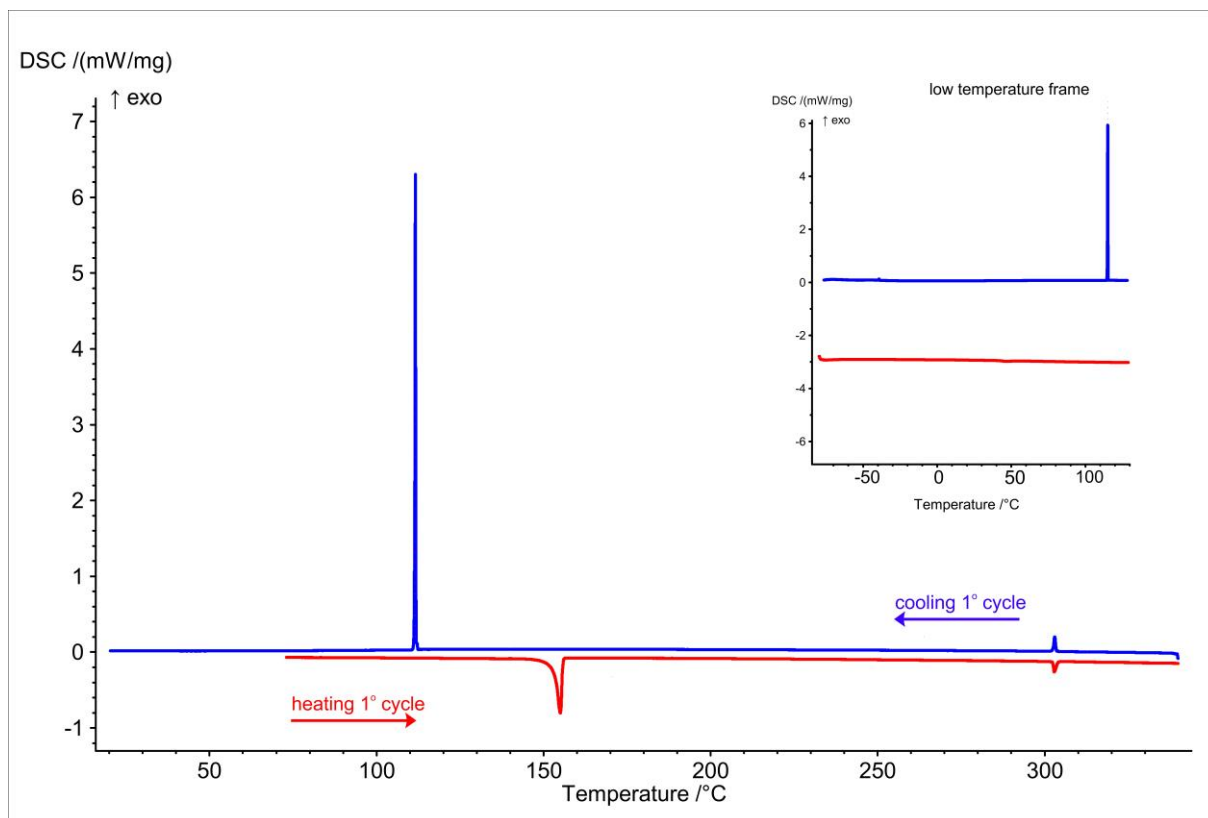

Figure S39. DSC of Sexi\_Ph2.

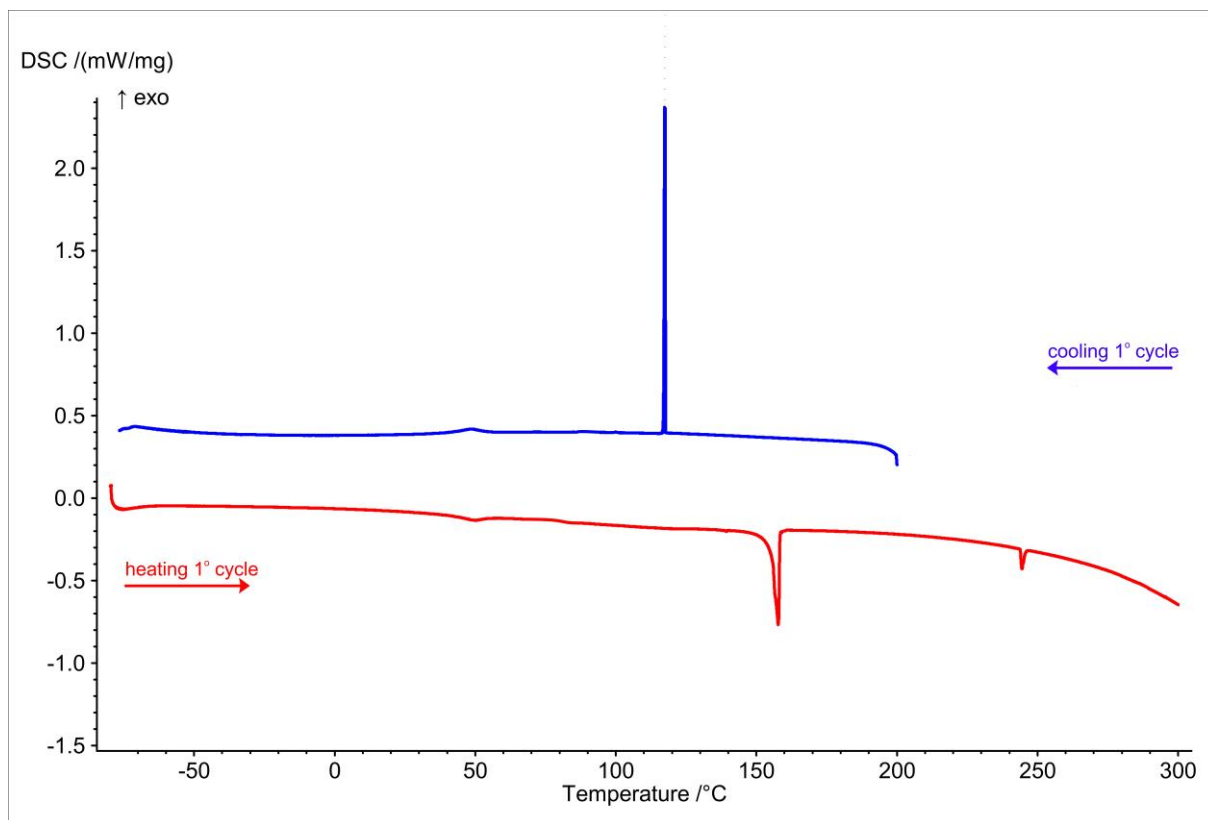

Figure S40. DSC of Sexi\_Ph3.

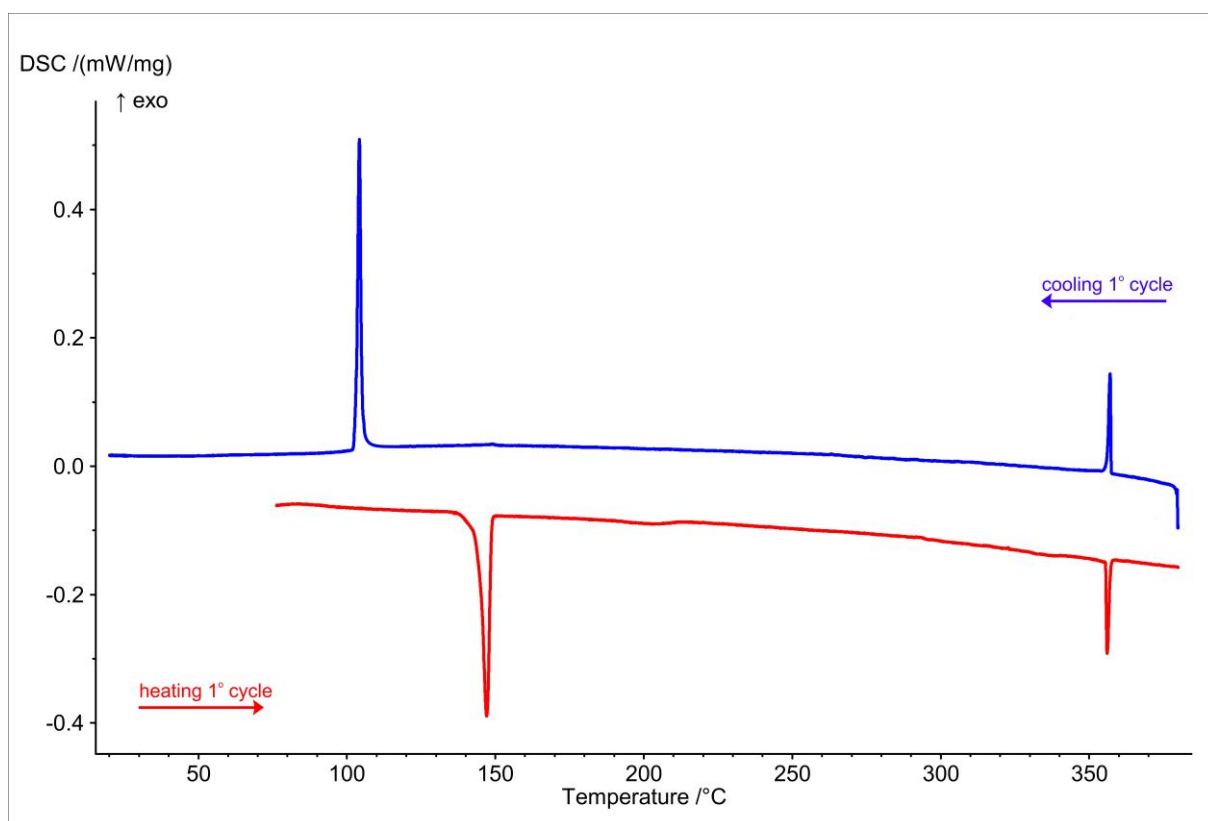

Figure S41. DSC of Sexi\_Ph4.

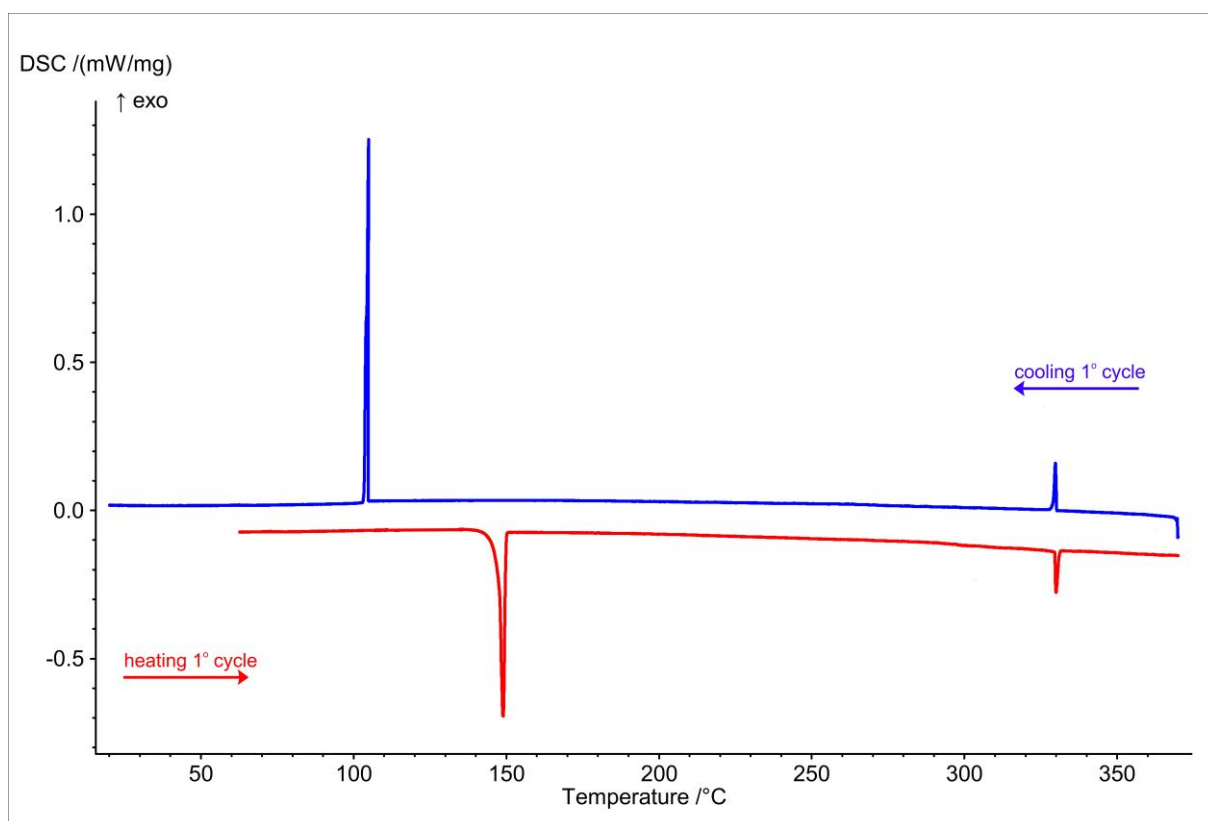

Figure S42. DSC of Sexi\_Ph5.

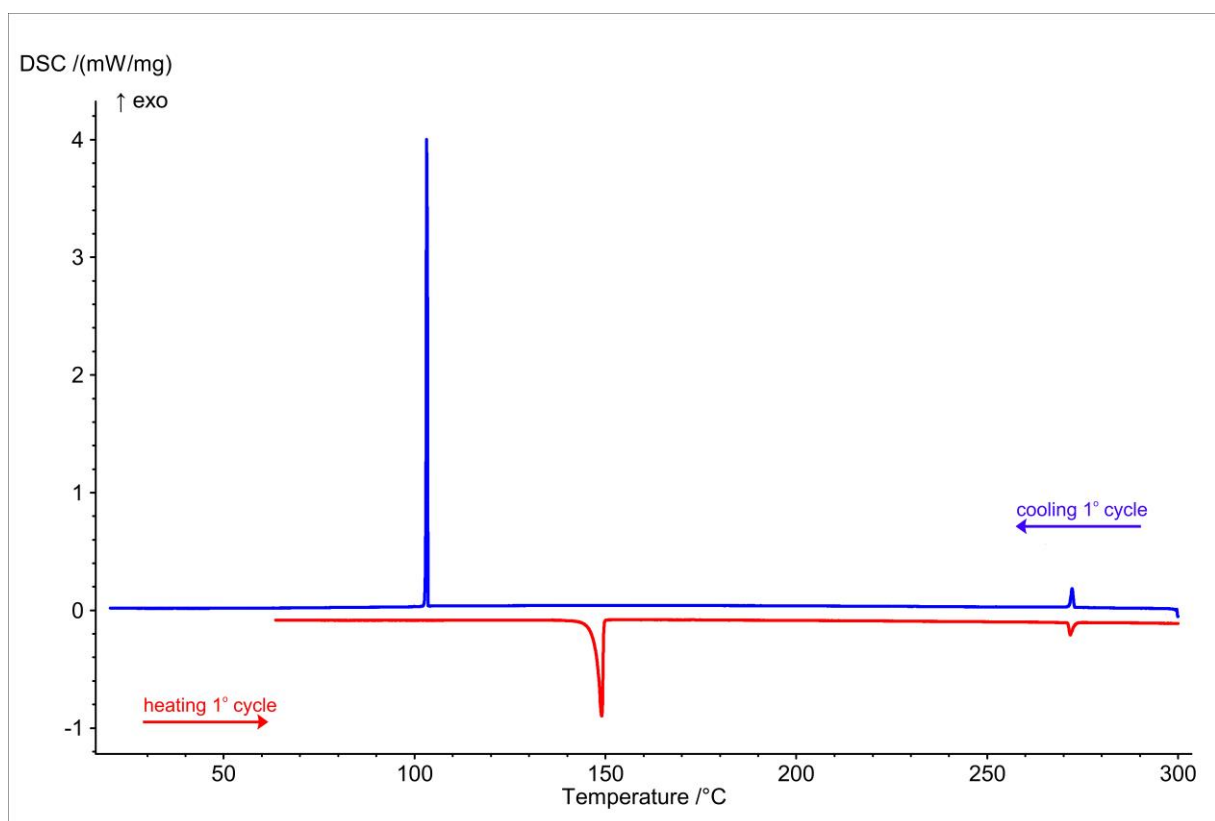

Figure S43. DSC of **Sexi\_Ph6**.

## 5. Computational investigation

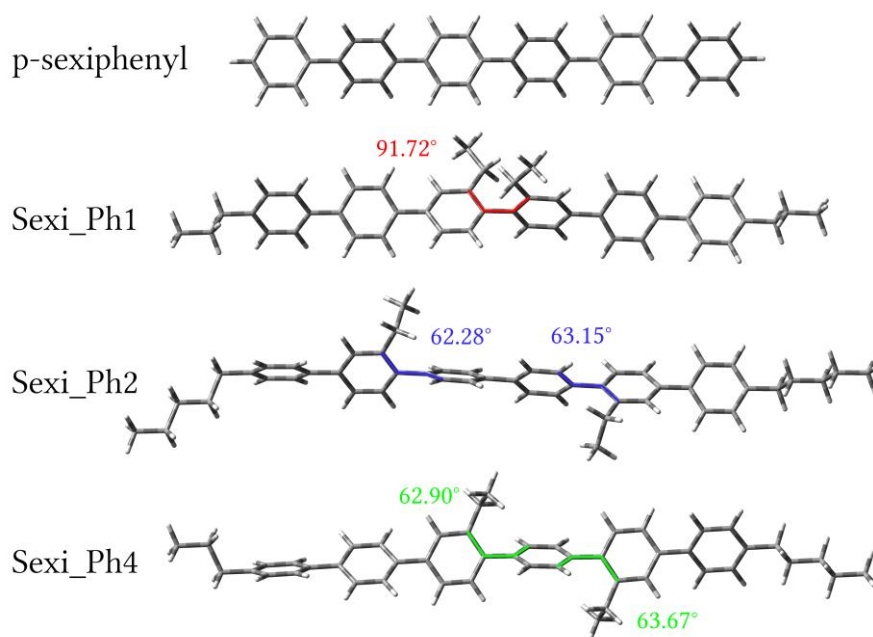

Figure S44. Optimized ground state geometry of p-sexiphenyl[1], **Sexi\_Ph1**, **Sexi\_Ph2**, and **Sexi\_Ph4**.

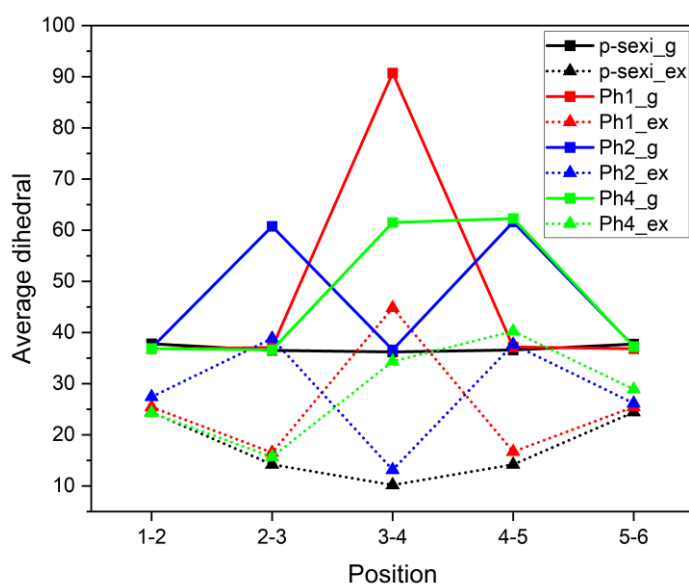

Figure S45. Average dihedrals in ground (■) and excited (▲) state for p-sexiphenyl[1], **Sexi\_Ph1**, **Sexi\_Ph2**, and **Sexi\_Ph4**.

Table S1. Calculated values of isotropic polarizability( $\alpha$ ), polarizability anisotropy( $\Delta\alpha$ ), and XX, YY, and ZZ polarizability tensor elements.

| Compound     | $\alpha$ | $\Delta\alpha$ | XX   | YY  | ZZ  |
|--------------|----------|----------------|------|-----|-----|
| p-sexiphenyl | 461      | 680            | 895  | 338 | 150 |
| Sexi_Ph1     | 574      | 694            | 1032 | 313 | 376 |
| Sexi_Ph2     | 618      | 703            | 1082 | 369 | 405 |
| Sexi_Ph3     | 641      | 697            | 1099 | 400 | 424 |
| Sexi_Ph4     | 594      | 694            | 1054 | 394 | 335 |
| Sexi_Ph5     | 606      | 691            | 1064 | 403 | 350 |
| Sexi_Ph6     | 630      | 704            | 1096 | 440 | 355 |

All values in expressed in Bohr<sup>3</sup>(with 1 Bohr = 0.52917 Å).

Table S2. Ground state Cartesian coordinates of Sexi\_Ph1

|   |                 |                 |                 |
|---|-----------------|-----------------|-----------------|
| C | 11.504327000000 | -1.280014000000 | 0.904140000000  |
| C | 10.106850000000 | -1.249348000000 | 0.871685000000  |
| C | 9.417387000000  | -0.207170000000 | 0.218837000000  |
| C | 10.185671000000 | 0.802315000000  | -0.396067000000 |
| C | 11.583020000000 | 0.768313000000  | -0.359550000000 |
| C | 12.270376000000 | -0.274014000000 | 0.287997000000  |
| H | 12.008255000000 | -2.089315000000 | 1.427364000000  |
| H | 9.544334000000  | -2.025083000000 | 1.382789000000  |
| H | 9.685506000000  | 1.608299000000  | -0.924884000000 |
| H | 12.148888000000 | 1.559534000000  | -0.845810000000 |
| C | 7.931731000000  | -0.171359000000 | 0.184682000000  |
| C | 7.226647000000  | 1.043222000000  | 0.306694000000  |
| C | 7.176101000000  | -1.351258000000 | 0.028671000000  |
| C | 5.830755000000  | 1.076671000000  | 0.271341000000  |
| H | 7.776665000000  | 1.969213000000  | 0.445391000000  |
| C | 5.780154000000  | -1.318321000000 | -0.001467000000 |
| H | 7.687489000000  | -2.302461000000 | -0.085078000000 |
| C | 5.075064000000  | -0.103438000000 | 0.118074000000  |
| H | 5.320550000000  | 2.032026000000  | 0.349626000000  |
| H | 5.229061000000  | -2.248274000000 | -0.104788000000 |
| C | 3.588804000000  | -0.069332000000 | 0.081163000000  |
| C | 2.863970000000  | -0.908319000000 | -0.783535000000 |
| C | 2.865101000000  | 0.804802000000  | 0.917921000000  |
| C | 1.467307000000  | -0.861717000000 | -0.804272000000 |
| H | 3.389482000000  | -1.577922000000 | -1.457398000000 |
| C | 1.463432000000  | 0.866024000000  | 0.911009000000  |
| H | 3.418365000000  | 1.429976000000  | 1.609401000000  |
| C | 0.750007000000  | 0.015340000000  | 0.026404000000  |
| H | 0.918203000000  | -1.510772000000 | -1.481227000000 |
| C | -0.749995000000 | 0.015323000000  | -0.026403000000 |
| C | -1.467271000000 | -0.861654000000 | 0.804375000000  |
| C | -1.463442000000 | 0.865890000000  | -0.911102000000 |
| C | -2.863936000000 | -0.908290000000 | 0.783647000000  |
| H | -0.918152000000 | -1.510632000000 | 1.481392000000  |
| C | -2.865109000000 | 0.804635000000  | -0.918007000000 |
| C | -3.588792000000 | -0.069420000000 | -0.081146000000 |



|   |                  |                 |                 |
|---|------------------|-----------------|-----------------|
| H | -3.389426000000  | -1.577843000000 | 1.457575000000  |
| H | -3.418385000000  | 1.429699000000  | -1.609577000000 |
| C | -5.075049000000  | -0.103580000000 | -0.118063000000 |
| C | -5.830778000000  | 1.076484000000  | -0.271497000000 |
| C | -5.780105000000  | -1.318469000000 | 0.001623000000  |
| C | -7.226668000000  | 1.042984000000  | -0.306879000000 |
| H | -5.320605000000  | 2.031846000000  | -0.349899000000 |
| C | -7.176049000000  | -1.351457000000 | -0.028544000000 |
| H | -5.228986000000  | -2.248393000000 | 0.105068000000  |
| C | -7.931716000000  | -0.171609000000 | -0.184732000000 |
| H | -7.776711000000  | 1.968937000000  | -0.445707000000 |
| H | -7.687405000000  | -2.302665000000 | 0.085323000000  |
| C | -9.417370000000  | -0.207466000000 | -0.218921000000 |
| C | -10.106786000000 | -1.249771000000 | -0.871600000000 |
| C | -10.185705000000 | 0.802078000000  | 0.395842000000  |
| C | -11.504268000000 | -1.280502000000 | -0.904056000000 |
| H | -9.544243000000  | -2.025573000000 | -1.382573000000 |
| C | -11.583047000000 | 0.768009000000  | 0.359326000000  |
| H | -9.685574000000  | 1.608151000000  | 0.924554000000  |
| C | -12.270359000000 | -0.274442000000 | -0.288082000000 |
| H | -12.008159000000 | -2.089888000000 | -1.427183000000 |
| H | -12.148947000000 | 1.559302000000  | 0.845432000000  |
| C | 13.784990000000  | -0.332121000000 | 0.288223000000  |
| H | 14.137193000000  | -0.807232000000 | 1.214800000000  |
| H | 14.194961000000  | 0.687752000000  | 0.283098000000  |
| C | 14.367531000000  | -1.107871000000 | -0.920193000000 |
| H | 13.959748000000  | -2.128548000000 | -0.919163000000 |
| H | 14.017636000000  | -0.636285000000 | -1.849295000000 |
| C | 15.903952000000  | -1.158992000000 | -0.906607000000 |
| H | 16.290481000000  | -1.712175000000 | -1.770904000000 |
| H | 16.333669000000  | -0.149212000000 | -0.935795000000 |
| H | 16.275365000000  | -1.652993000000 | 0.000687000000  |
| C | -13.784978000000 | -0.332568000000 | -0.288320000000 |
| H | -14.137095000000 | -0.808837000000 | -1.214334000000 |
| H | -14.194967000000 | 0.687311000000  | -0.284506000000 |
| C | -14.367605000000 | -1.106807000000 | 0.921008000000  |
| H | -13.959843000000 | -2.127493000000 | 0.921280000000  |
| H | -14.017782000000 | -0.634093000000 | 1.849564000000  |
| C | -15.904027000000 | -1.157916000000 | 0.907367000000  |
| H | -16.275376000000 | -1.653024000000 | 0.000651000000  |
| H | -16.290651000000 | -1.710024000000 | 1.772310000000  |
| H | -16.333725000000 | -0.148092000000 | 0.935268000000  |
| C | 0.697412000000   | 1.801918000000  | 1.840777000000  |
| H | 0.017431000000   | 2.418800000000  | 1.235761000000  |
| H | 0.036734000000   | 1.197738000000  | 2.478889000000  |
| C | 1.543358000000   | 2.723251000000  | 2.732231000000  |
| H | 2.183060000000   | 2.153860000000  | 3.417095000000  |
| H | 2.186185000000   | 3.385601000000  | 2.139678000000  |
| H | 0.888082000000   | 3.355671000000  | 3.342037000000  |
| C | -0.697437000000  | 1.801741000000  | -1.840924000000 |
| H | -0.018010000000  | 2.419199000000  | -1.235858000000 |
| H | -0.036196000000  | 1.197598000000  | -2.478475000000 |
| C | -1.543399000000  | 2.722319000000  | -2.733141000000 |
| H | -2.182726000000  | 2.152331000000  | -3.417861000000 |
| H | -2.186602000000  | 3.384821000000  | -2.141167000000 |

H -0.888133000000 3.354594000000 -3.343108000000

Table S3. Excited state Cartesian coordinates of Sexi\_Ph1

|   |                  |                 |                 |
|---|------------------|-----------------|-----------------|
| C | -11.420880000000 | -1.305525000000 | 0.885754000000  |
| C | -10.036491000000 | -1.198554000000 | 0.868337000000  |
| C | -9.388474000000  | -0.131154000000 | 0.205011000000  |
| C | -10.217122000000 | 0.819801000000  | -0.434280000000 |
| C | -11.600807000000 | 0.706238000000  | -0.409736000000 |
| C | -12.237441000000 | -0.358326000000 | 0.247926000000  |
| H | -11.882545000000 | -2.145371000000 | 1.400065000000  |
| H | -9.443579000000  | -1.970218000000 | 1.348558000000  |
| H | -9.768811000000  | 1.679805000000  | -0.921149000000 |
| H | -12.205245000000 | 1.467124000000  | -0.898330000000 |
| C | -7.927954000000  | -0.013111000000 | 0.184758000000  |
| C | -7.248691000000  | 0.679526000000  | -0.848965000000 |
| C | -7.117072000000  | -0.584820000000 | 1.196964000000  |
| C | -5.873276000000  | 0.785367000000  | -0.875696000000 |
| H | -7.819587000000  | 1.117768000000  | -1.661290000000 |
| C | -5.742285000000  | -0.468078000000 | 1.183277000000  |
| H | -7.586231000000  | -1.106607000000 | 2.024874000000  |
| C | -5.053079000000  | 0.218985000000  | 0.142442000000  |
| H | -5.416482000000  | 1.341440000000  | -1.686690000000 |
| H | -5.177807000000  | -0.940327000000 | 1.979514000000  |
| C | -3.608021000000  | 0.331452000000  | 0.125833000000  |
| C | -2.817809000000  | 0.087500000000  | 1.285737000000  |
| C | -2.893923000000  | 0.705624000000  | -1.047963000000 |
| C | -1.449845000000  | 0.205901000000  | 1.250242000000  |
| H | -3.292849000000  | -0.178832000000 | 2.223126000000  |
| C | -1.515724000000  | 0.805364000000  | -1.120442000000 |
| H | -3.462587000000  | 0.913774000000  | -1.945373000000 |
| C | -0.730177000000  | 0.532564000000  | 0.061396000000  |
| H | -0.886052000000  | -0.023300000000 | 2.147036000000  |
| C | 0.724298000000   | 0.507127000000  | 0.078785000000  |
| C | 1.424733000000   | -0.171352000000 | -0.963822000000 |
| C | 1.525880000000   | 1.075114000000  | 1.138582000000  |
| C | 2.786972000000   | -0.347073000000 | -0.955998000000 |
| H | 0.848007000000   | -0.624609000000 | -1.761687000000 |
| C | 2.898909000000   | 0.906568000000  | 1.105509000000  |
| C | 3.591868000000   | 0.186446000000  | 0.091227000000  |
| H | 3.246800000000   | -0.886964000000 | -1.775993000000 |
| H | 3.479844000000   | 1.339618000000  | 1.909932000000  |
| C | 5.031364000000   | 0.017650000000  | 0.116419000000  |
| C | 5.878504000000   | 0.819966000000  | 0.934067000000  |
| C | 5.687277000000   | -0.966083000000 | -0.678767000000 |
| C | 7.248548000000   | 0.656818000000  | 0.947727000000  |
| H | 5.448134000000   | 1.603149000000  | 1.548080000000  |
| C | 7.056276000000   | -1.135975000000 | -0.649373000000 |
| H | 5.100258000000   | -1.624610000000 | -1.309188000000 |
| C | 7.894352000000   | -0.329964000000 | 0.161103000000  |
| H | 7.840456000000   | 1.287169000000  | 1.603564000000  |
| H | 7.500316000000   | -1.891821000000 | -1.289191000000 |
| C | 9.348933000000   | -0.506948000000 | 0.183713000000  |
| C | 9.948841000000   | -1.746897000000 | -0.136040000000 |
| C | 10.219025000000  | 0.552109000000  | 0.530833000000  |

|   |                  |                 |                 |
|---|------------------|-----------------|-----------------|
| C | 11.327327000000  | -1.911699000000 | -0.109509000000 |
| H | 9.321588000000   | -2.601433000000 | -0.368335000000 |
| C | 11.596673000000  | 0.378977000000  | 0.552390000000  |
| H | 9.808727000000   | 1.531314000000  | 0.755413000000  |
| C | 12.185554000000  | -0.854662000000 | 0.232919000000  |
| H | 11.750755000000  | -2.885549000000 | -0.344761000000 |
| H | 12.233870000000  | 1.219759000000  | 0.817073000000  |
| C | -13.740706000000 | -0.501643000000 | 0.233762000000  |
| H | -14.206293000000 | 0.492369000000  | 0.219566000000  |
| H | -14.074396000000 | -0.988633000000 | 1.159176000000  |
| C | -14.263524000000 | -1.312451000000 | -0.971259000000 |
| H | -13.928582000000 | -0.829286000000 | -1.897690000000 |
| H | -13.797407000000 | -2.305693000000 | -0.961261000000 |
| C | -15.788118000000 | -1.451781000000 | -0.977344000000 |
| H | -16.131091000000 | -2.030233000000 | -1.841167000000 |
| H | -16.144268000000 | -1.959972000000 | -0.073998000000 |
| H | -16.276516000000 | -0.471505000000 | -1.018161000000 |
| C | 13.685773000000  | -1.026911000000 | 0.217355000000  |
| H | 13.942273000000  | -2.055575000000 | 0.502143000000  |
| H | 14.140880000000  | -0.372262000000 | 0.971803000000  |
| C | 14.319729000000  | -0.718885000000 | -1.155966000000 |
| H | 13.864031000000  | -1.369966000000 | -1.912499000000 |
| H | 14.062564000000  | 0.307983000000  | -1.444599000000 |
| C | 15.840268000000  | -0.897126000000 | -1.162039000000 |
| H | 16.120814000000  | -1.925223000000 | -0.906204000000 |
| H | 16.263024000000  | -0.672429000000 | -2.146526000000 |
| H | 16.321015000000  | -0.233604000000 | -0.434196000000 |
| C | -0.866014000000  | 1.280856000000  | -2.413928000000 |
| H | 0.085313000000   | 1.761598000000  | -2.168024000000 |
| H | -0.600914000000  | 0.417528000000  | -3.040707000000 |
| C | -1.699930000000  | 2.251881000000  | -3.261543000000 |
| H | -2.591992000000  | 1.780347000000  | -3.684908000000 |
| H | -2.023707000000  | 3.116263000000  | -2.673229000000 |
| H | -1.102409000000  | 2.618504000000  | -4.102111000000 |
| C | 0.901570000000   | 1.922976000000  | 2.239790000000  |
| H | -0.033403000000  | 2.347698000000  | 1.862984000000  |
| H | 0.609676000000   | 1.284423000000  | 3.085677000000  |
| C | 1.775080000000   | 3.064661000000  | 2.778656000000  |
| H | 2.652507000000   | 2.701592000000  | 3.322391000000  |
| H | 2.125623000000   | 3.713214000000  | 1.969578000000  |
| H | 1.196484000000   | 3.676985000000  | 3.477432000000  |

Table S4. Ground state Cartesian coordinates of Sexi\_Ph2

|   |                 |                 |                 |
|---|-----------------|-----------------|-----------------|
| C | 11.526001000000 | -1.408716000000 | -0.511672000000 |
| C | 10.131480000000 | -1.399466000000 | -0.409997000000 |
| C | 9.391754000000  | -0.226611000000 | -0.663869000000 |
| C | 10.106206000000 | 0.933147000000  | -1.026448000000 |
| C | 11.500768000000 | 0.918928000000  | -1.128123000000 |
| C | 12.238684000000 | -0.250225000000 | -0.870039000000 |
| H | 12.068755000000 | -2.332223000000 | -0.323693000000 |
| H | 9.608716000000  | -2.317917000000 | -0.159878000000 |
| H | 9.567084000000  | 1.857888000000  | -1.209876000000 |
| H | 12.024923000000 | 1.830138000000  | -1.406879000000 |
| C | 7.908181000000  | -0.213504000000 | -0.559737000000 |

|   |                  |                 |                 |
|---|------------------|-----------------|-----------------|
| C | 7.118626000000   | 0.509805000000  | -1.473656000000 |
| C | 7.244630000000   | -0.924243000000 | 0.457404000000  |
| C | 5.728210000000   | 0.519901000000  | -1.352945000000 |
| H | 7.590782000000   | 1.050066000000  | -2.288415000000 |
| C | 5.845956000000   | -0.933928000000 | 0.592259000000  |
| H | 7.835546000000   | -1.477467000000 | 1.183063000000  |
| C | 5.067438000000   | -0.185143000000 | -0.327297000000 |
| H | 5.133901000000   | 1.091353000000  | -2.060526000000 |
| C | 3.575461000000   | -0.110573000000 | -0.260949000000 |
| C | 2.913212000000   | 0.482686000000  | 0.831700000000  |
| C | 2.786838000000   | -0.586629000000 | -1.326148000000 |
| C | 1.520071000000   | 0.585869000000  | 0.862036000000  |
| H | 3.497886000000   | 0.894299000000  | 1.649393000000  |
| C | 1.392553000000   | -0.486811000000 | -1.295056000000 |
| H | 3.272868000000   | -1.055414000000 | -2.177183000000 |
| C | 0.728865000000   | 0.099910000000  | -0.199251000000 |
| H | 1.041951000000   | 1.078904000000  | 1.703234000000  |
| H | 0.812191000000   | -0.893048000000 | -2.118084000000 |
| C | -0.753400000000  | 0.208387000000  | -0.164394000000 |
| C | -1.491843000000  | 0.498243000000  | -1.328957000000 |
| C | -1.469782000000  | 0.020523000000  | 1.035642000000  |
| C | -2.885837000000  | 0.600305000000  | -1.293749000000 |
| H | -0.969673000000  | 0.672675000000  | -2.264967000000 |
| C | -2.862597000000  | 0.126037000000  | 1.070540000000  |
| H | -0.933887000000  | -0.243220000000 | 1.942591000000  |
| C | -3.599532000000  | 0.423684000000  | -0.092602000000 |
| H | -3.429943000000  | 0.838520000000  | -2.203393000000 |
| H | -3.389366000000  | -0.054904000000 | 2.003099000000  |
| C | -5.092840000000  | 0.494185000000  | -0.078665000000 |
| C | -5.814897000000  | 1.452444000000  | 0.678564000000  |
| C | -5.814646000000  | -0.433154000000 | -0.856433000000 |
| C | -7.219093000000  | 1.424756000000  | 0.639738000000  |
| C | -7.210066000000  | -0.440696000000 | -0.883968000000 |
| H | -5.264583000000  | -1.177413000000 | -1.425540000000 |
| C | -7.943053000000  | 0.491795000000  | -0.125598000000 |
| H | -7.764406000000  | 2.179506000000  | 1.200873000000  |
| H | -7.731261000000  | -1.193842000000 | -1.466902000000 |
| C | -9.430133000000  | 0.493488000000  | -0.133966000000 |
| C | -10.151457000000 | 0.239562000000  | -1.318225000000 |
| C | -10.166809000000 | 0.753442000000  | 1.039261000000  |
| C | -11.549629000000 | 0.243497000000  | -1.325782000000 |
| H | -9.613093000000  | 0.066462000000  | -2.245417000000 |
| C | -11.565120000000 | 0.757852000000  | 1.026687000000  |
| H | -9.640782000000  | 0.932904000000  | 1.972302000000  |
| C | -12.284371000000 | 0.500210000000  | -0.154129000000 |
| H | -12.078943000000 | 0.057860000000  | -2.257516000000 |
| H | -12.106566000000 | 0.958629000000  | 1.948254000000  |
| C | 13.752986000000  | -0.252576000000 | -0.939879000000 |
| H | 14.088706000000  | 0.467124000000  | -1.699657000000 |
| H | 14.105858000000  | -1.241068000000 | -1.266222000000 |
| C | 14.427987000000  | 0.096534000000  | 0.410174000000  |
| H | 14.077859000000  | 1.085403000000  | 0.741091000000  |
| H | 14.094512000000  | -0.621336000000 | 1.174004000000  |
| C | 15.965271000000  | 0.091856000000  | 0.332861000000  |
| H | 16.293770000000  | 0.809477000000  | -0.435517000000 |

|   |                  |                 |                 |
|---|------------------|-----------------|-----------------|
| H | 16.310309000000  | -0.898935000000 | -0.002727000000 |
| C | 16.646232000000  | 0.437360000000  | 1.670688000000  |
| H | 16.301314000000  | 1.426970000000  | 2.005939000000  |
| H | 16.318005000000  | -0.279599000000 | 2.438117000000  |
| C | 18.182086000000  | 0.430968000000  | 1.586184000000  |
| H | 18.539400000000  | 1.162078000000  | 0.849362000000  |
| H | 18.636671000000  | 0.680153000000  | 2.552601000000  |
| H | 18.556210000000  | -0.555989000000 | 1.284418000000  |
| C | -13.799832000000 | 0.463073000000  | -0.156207000000 |
| H | -14.187524000000 | 1.165297000000  | 0.595155000000  |
| H | -14.176108000000 | 0.806239000000  | -1.130257000000 |
| C | -14.377288000000 | -0.945176000000 | 0.132777000000  |
| H | -14.003724000000 | -1.292976000000 | 1.107173000000  |
| H | -13.991257000000 | -1.651765000000 | -0.616675000000 |
| C | -15.916198000000 | -0.976685000000 | 0.128102000000  |
| H | -16.297626000000 | -0.265200000000 | 0.877511000000  |
| H | -16.284959000000 | -0.623812000000 | -0.848036000000 |
| C | -16.500418000000 | -2.373029000000 | 0.413989000000  |
| H | -16.131900000000 | -2.725460000000 | 1.389016000000  |
| H | -16.119174000000 | -3.083609000000 | -0.334626000000 |
| C | -18.038409000000 | -2.397316000000 | 0.407660000000  |
| H | -18.423180000000 | -3.403348000000 | 0.613938000000  |
| H | -18.446508000000 | -1.719858000000 | 1.168985000000  |
| H | -18.433692000000 | -2.080537000000 | -0.566261000000 |
| C | 5.226765000000   | -1.808156000000 | 1.672314000000  |
| H | 5.950900000000   | -1.926930000000 | 2.488848000000  |
| H | 4.343323000000   | -1.328137000000 | 2.104110000000  |
| C | 4.824932000000   | -3.206684000000 | 1.147663000000  |
| H | 4.070634000000   | -3.125635000000 | 0.356994000000  |
| H | 5.693152000000   | -3.734020000000 | 0.734733000000  |
| H | 4.405659000000   | -3.817167000000 | 1.956811000000  |
| C | -5.133246000000  | 2.573147000000  | 1.449244000000  |
| H | -5.797558000000  | 2.899775000000  | 2.259963000000  |
| H | -4.212737000000  | 2.217570000000  | 1.921934000000  |
| C | -4.794903000000  | 3.788842000000  | 0.554703000000  |
| H | -4.098725000000  | 3.505089000000  | -0.242534000000 |
| H | -5.699948000000  | 4.193552000000  | 0.086354000000  |
| H | -4.328538000000  | 4.586213000000  | 1.146225000000  |

Table S5. Excited state Cartesian coordinates of Sexi\_Ph2

|   |                  |                 |                 |
|---|------------------|-----------------|-----------------|
| C | -11.523609000000 | -1.515095000000 | 0.104767000000  |
| C | -10.140120000000 | -1.503208000000 | -0.019202000000 |
| C | -9.355855000000  | -0.505178000000 | 0.600386000000  |
| C | -10.042381000000 | 0.475131000000  | 1.350388000000  |
| C | -11.426584000000 | 0.457918000000  | 1.466990000000  |
| C | -12.200609000000 | -0.535536000000 | 0.847951000000  |
| H | -12.093448000000 | -2.309363000000 | -0.371990000000 |
| H | -9.653833000000  | -2.301081000000 | -0.571095000000 |
| H | -9.483367000000  | 1.277522000000  | 1.821040000000  |
| H | -11.921328000000 | 1.234186000000  | 2.046191000000  |
| C | -7.892102000000  | -0.486820000000 | 0.478487000000  |
| C | -7.070831000000  | 0.077808000000  | 1.481182000000  |

|   |                  |                 |                 |
|---|------------------|-----------------|-----------------|
| C | -7.233313000000  | -1.044297000000 | -0.639005000000 |
| C | -5.698261000000  | 0.091324000000  | 1.346273000000  |
| H | -7.518358000000  | 0.491177000000  | 2.379219000000  |
| C | -5.852925000000  | -1.039199000000 | -0.808707000000 |
| H | -7.834109000000  | -1.498827000000 | -1.421451000000 |
| C | -5.032795000000  | -0.424796000000 | 0.199670000000  |
| H | -5.101033000000  | 0.560846000000  | 2.121277000000  |
| C | -3.582561000000  | -0.298392000000 | 0.135153000000  |
| C | -2.872135000000  | 0.039669000000  | -1.053932000000 |
| C | -2.789838000000  | -0.440382000000 | 1.313027000000  |
| C | -1.504951000000  | 0.193037000000  | -1.069806000000 |
| H | -3.426862000000  | 0.263581000000  | -1.957435000000 |
| C | -1.421489000000  | -0.303221000000 | 1.298509000000  |
| H | -3.277105000000  | -0.725951000000 | 2.240218000000  |
| C | -0.702951000000  | 0.016102000000  | 0.102099000000  |
| H | -1.036148000000  | 0.514475000000  | -1.993190000000 |
| H | -0.876750000000  | -0.489176000000 | 2.217243000000  |
| C | 0.728853000000   | 0.162689000000  | 0.079962000000  |
| C | 1.506960000000   | 0.260664000000  | 1.278142000000  |
| C | 1.471492000000   | 0.206793000000  | -1.142787000000 |
| C | 2.874318000000   | 0.400894000000  | 1.250753000000  |
| H | 1.008635000000   | 0.271460000000  | 2.240954000000  |
| C | 2.837741000000   | 0.362657000000  | -1.166530000000 |
| H | 0.956596000000   | 0.055421000000  | -2.084976000000 |
| C | 3.608270000000   | 0.483337000000  | 0.028595000000  |
| H | 3.407194000000   | 0.515146000000  | 2.189657000000  |
| H | 3.347072000000   | 0.308152000000  | -2.121416000000 |
| C | 5.057288000000   | 0.605949000000  | 0.041631000000  |
| C | 5.828401000000   | 1.381030000000  | -0.895580000000 |
| C | 5.781893000000   | -0.087038000000 | 1.053110000000  |
| C | 7.214846000000   | 1.349555000000  | -0.812420000000 |
| C | 7.158892000000   | -0.091236000000 | 1.113788000000  |
| H | 5.226471000000   | -0.697571000000 | 1.757629000000  |
| C | 7.930702000000   | 0.618328000000  | 0.163080000000  |
| H | 7.774103000000   | 1.977665000000  | -1.499949000000 |
| H | 7.651810000000   | -0.697208000000 | 1.867060000000  |
| C | 9.396618000000   | 0.610799000000  | 0.196504000000  |
| C | 10.106832000000  | 0.386150000000  | 1.397614000000  |
| C | 10.164235000000  | 0.830242000000  | -0.969555000000 |
| C | 11.495275000000  | 0.382038000000  | 1.425992000000  |
| H | 9.560350000000   | 0.252180000000  | 2.325584000000  |
| C | 11.552525000000  | 0.822653000000  | -0.932679000000 |
| H | 9.662382000000   | 0.977033000000  | -1.920493000000 |
| C | 12.252084000000  | 0.598143000000  | 0.263495000000  |
| H | 12.007549000000  | 0.222006000000  | 2.371964000000  |
| H | 12.109986000000  | 0.987962000000  | -1.851806000000 |
| C | -13.708082000000 | -0.527765000000 | 0.943709000000  |
| H | -14.013859000000 | -0.103533000000 | 1.908568000000  |
| H | -14.083649000000 | -1.558847000000 | 0.923491000000  |
| C | -14.384188000000 | 0.271775000000  | -0.190104000000 |
| H | -14.006670000000 | 1.302836000000  | -0.174704000000 |
| H | -14.076797000000 | -0.149047000000 | -1.156689000000 |
| C | -15.914040000000 | 0.279898000000  | -0.092798000000 |
| H | -16.215040000000 | 0.697840000000  | 0.878665000000  |
| H | -16.285319000000 | -0.755019000000 | -0.104098000000 |
| C | -16.593212000000 | 1.072855000000  | -1.216360000000 |
| H | -16.221727000000 | 2.106457000000  | -1.204507000000 |
| H | -16.292431000000 | 0.654619000000  | -2.186463000000 |
| C | -18.121382000000 | 1.077954000000  | -1.113812000000 |
| H | -18.453873000000 | 1.522819000000  | -0.169007000000 |
| H | -18.575517000000 | 1.651159000000  | -1.928539000000 |
| H | -18.525207000000 | 0.060081000000  | -1.158339000000 |
| C | 13.761331000000  | 0.548223000000  | 0.291024000000  |

|   |                 |                 |                 |
|---|-----------------|-----------------|-----------------|
| H | 14.166679000000 | 1.225650000000  | -0.471392000000 |
| H | 14.124383000000 | 0.915653000000  | 1.259428000000  |
| C | 14.326032000000 | -0.868111000000 | 0.051353000000  |
| H | 13.961237000000 | -1.239418000000 | -0.915550000000 |
| H | 13.918221000000 | -1.548563000000 | 0.810635000000  |
| C | 15.857877000000 | -0.919573000000 | 0.080341000000  |
| H | 16.259958000000 | -0.233017000000 | -0.678602000000 |
| H | 16.216780000000 | -0.542420000000 | 1.048834000000  |
| C | 16.426059000000 | -2.324276000000 | -0.157096000000 |
| H | 16.067321000000 | -2.700213000000 | -1.124806000000 |
| H | 16.023883000000 | -3.009512000000 | 0.601315000000  |
| C | 17.956704000000 | -2.370068000000 | -0.126780000000 |
| H | 18.330480000000 | -3.384562000000 | -0.299062000000 |
| H | 18.388157000000 | -1.721606000000 | -0.897796000000 |
| H | 18.344376000000 | -2.033037000000 | 0.841334000000  |
| C | -5.292106000000 | -1.822288000000 | -1.983097000000 |
| H | -6.111768000000 | -2.022652000000 | -2.682009000000 |
| H | -4.552232000000 | -1.248505000000 | -2.545362000000 |
| C | -4.658478000000 | -3.161053000000 | -1.559348000000 |
| H | -3.811761000000 | -3.001746000000 | -0.886300000000 |
| H | -5.388759000000 | -3.789883000000 | -1.040264000000 |
| H | -4.296685000000 | -3.709879000000 | -2.435131000000 |
| C | 5.210185000000  | 2.378780000000  | -1.859448000000 |
| H | 5.985296000000  | 2.697634000000  | -2.565171000000 |
| H | 4.418634000000  | 1.930461000000  | -2.463886000000 |
| C | 4.640131000000  | 3.620482000000  | -1.147663000000 |
| H | 3.838764000000  | 3.345451000000  | -0.456531000000 |
| H | 5.419774000000  | 4.132401000000  | -0.574811000000 |
| H | 4.231243000000  | 4.328258000000  | -1.876356000000 |

Table S6. Ground state Cartesian coordinates of Sexi\_Ph4

|   |                  |                 |                 |
|---|------------------|-----------------|-----------------|
| C | -12.605727000000 | -0.397124000000 | -1.035213000000 |
| C | -11.210754000000 | -0.308138000000 | -1.068046000000 |
| C | -10.446127000000 | -0.435457000000 | 0.109597000000  |
| C | -11.136616000000 | -0.657881000000 | 1.318401000000  |
| C | -12.531674000000 | -0.747668000000 | 1.346062000000  |
| C | -13.294282000000 | -0.616429000000 | 0.171544000000  |
| H | -13.167930000000 | -0.309134000000 | -1.961949000000 |
| H | -10.707568000000 | -0.168514000000 | -2.020258000000 |
| H | -10.578465000000 | -0.740089000000 | 2.246365000000  |
| H | -13.036729000000 | -0.916755000000 | 2.294217000000  |
| C | -8.962878000000  | -0.343911000000 | 0.076651000000  |
| C | -8.161001000000  | -1.173272000000 | 0.887034000000  |
| C | -8.306455000000  | 0.575474000000  | -0.766711000000 |
| C | -6.767475000000  | -1.085278000000 | 0.857528000000  |
| H | -8.633209000000  | -1.904977000000 | 1.535716000000  |
| C | -6.912741000000  | 0.659939000000  | -0.800048000000 |
| H | -8.893951000000  | 1.240977000000  | -1.392137000000 |
| C | -6.111173000000  | -0.167353000000 | 0.012546000000  |
| H | -6.180998000000  | -1.726990000000 | 1.508265000000  |
| H | -6.439493000000  | 1.366376000000  | -1.475438000000 |
| C | -4.627916000000  | -0.076745000000 | -0.020333000000 |
| C | -3.978283000000  | 1.164785000000  | -0.151655000000 |
| C | -3.823765000000  | -1.228027000000 | 0.080356000000  |
| C | -2.579706000000  | 1.291917000000  | -0.192836000000 |
| H | -4.578348000000  | 2.070463000000  | -0.190344000000 |
| C | -2.432664000000  | -1.123990000000 | 0.036983000000  |

|   |                  |                 |                 |
|---|------------------|-----------------|-----------------|
| H | -4.286147000000  | -2.207334000000 | 0.156053000000  |
| C | -1.785575000000  | 0.119354000000  | -0.107820000000 |
| H | -1.827427000000  | -2.024779000000 | 0.087976000000  |
| C | -0.291170000000  | 0.140964000000  | -0.162861000000 |
| C | 0.471169000000   | -0.320624000000 | 0.927905000000  |
| C | 0.398586000000   | 0.570176000000  | -1.312816000000 |
| C | 1.868816000000   | -0.346488000000 | 0.873857000000  |
| H | -0.038086000000  | -0.646065000000 | 1.830778000000  |
| C | 1.796191000000   | 0.543910000000  | -1.367024000000 |
| H | -0.164796000000  | 0.904941000000  | -2.179171000000 |
| C | 2.558546000000   | 0.082093000000  | -0.276311000000 |
| H | 2.432182000000   | -0.681116000000 | 1.740246000000  |
| H | 2.305523000000   | 0.869164000000  | -2.269895000000 |
| C | 4.053189000000   | 0.101255000000  | -0.332400000000 |
| C | 4.844411000000   | -1.073935000000 | -0.261424000000 |
| C | 4.702843000000   | 1.344575000000  | -0.464472000000 |
| C | 6.243491000000   | -0.949366000000 | -0.302424000000 |
| C | 6.094129000000   | 1.445427000000  | -0.511590000000 |
| H | 4.098900000000   | 2.245841000000  | -0.523117000000 |
| C | 6.895741000000   | 0.291446000000  | -0.424631000000 |
| H | 6.843303000000   | -1.852122000000 | -0.218453000000 |
| H | 6.558050000000   | 2.419410000000  | -0.633242000000 |
| C | 8.380029000000   | 0.378976000000  | -0.459891000000 |
| C | 9.062859000000   | 1.428300000000  | 0.187894000000  |
| C | 9.152238000000   | -0.579846000000 | -1.146607000000 |
| C | 10.458186000000  | 1.512028000000  | 0.151032000000  |
| H | 8.498034000000   | 2.172317000000  | 0.741828000000  |
| C | 10.547406000000  | -0.492940000000 | -1.179590000000 |
| H | 8.654987000000   | -1.382577000000 | -1.683032000000 |
| C | 11.228433000000  | 0.552362000000  | -0.530029000000 |
| H | 10.957375000000  | 2.331480000000  | 0.662967000000  |
| H | 11.115851000000  | -1.239617000000 | -1.729247000000 |
| C | -14.808525000000 | -0.670815000000 | 0.210700000000  |
| H | -15.134325000000 | -1.348097000000 | 1.012826000000  |
| H | -15.188272000000 | -1.093398000000 | -0.730317000000 |
| C | -15.465039000000 | 0.715115000000  | 0.433452000000  |
| H | -15.087779000000 | 1.141861000000  | 1.373457000000  |
| H | -15.141810000000 | 1.395882000000  | -0.366642000000 |
| C | -17.000280000000 | 0.644308000000  | 0.470859000000  |
| H | -17.346490000000 | -0.009397000000 | 1.282006000000  |
| H | -17.439767000000 | 1.636265000000  | 0.629917000000  |
| H | -17.401129000000 | 0.247424000000  | -0.470927000000 |
| C | 12.742756000000  | 0.621596000000  | -0.533025000000 |
| H | 13.064455000000  | 1.671710000000  | -0.491526000000 |
| H | 13.129118000000  | 0.212005000000  | -1.476983000000 |
| C | 13.392298000000  | -0.145640000000 | 0.645795000000  |
| H | 13.008042000000  | 0.260431000000  | 1.593111000000  |
| H | 13.073351000000  | -1.197697000000 | 0.608080000000  |
| C | 14.929711000000  | -0.071191000000 | 0.637463000000  |
| H | 15.243669000000  | 0.984054000000  | 0.671830000000  |
| H | 15.309034000000  | -0.475088000000 | -0.314541000000 |
| C | 15.585442000000  | -0.831537000000 | 1.805703000000  |
| H | 15.206016000000  | -0.428388000000 | 2.756589000000  |
| H | 15.272014000000  | -1.885702000000 | 1.771031000000  |
| C | 17.121538000000  | -0.752443000000 | 1.791567000000  |



|   |                 |                 |                 |
|---|-----------------|-----------------|-----------------|
| H | 17.557926000000 | -1.302663000000 | 2.633900000000  |
| H | 17.529710000000 | -1.178216000000 | 0.865702000000  |
| H | 17.463288000000 | 0.288639000000  | 1.858300000000  |
| C | 4.240653000000  | -2.469576000000 | -0.218447000000 |
| H | 4.959725000000  | -3.151134000000 | 0.254426000000  |
| H | 3.339096000000  | -2.485686000000 | 0.401474000000  |
| C | 3.886010000000  | -3.007820000000 | -1.624559000000 |
| H | 3.137622000000  | -2.371136000000 | -2.109575000000 |
| H | 4.773674000000  | -3.037146000000 | -2.267663000000 |
| H | 3.477133000000  | -4.023497000000 | -1.557753000000 |
| C | -1.979459000000 | 2.689403000000  | -0.225488000000 |
| H | -1.068459000000 | 2.707812000000  | -0.831255000000 |
| H | -2.692786000000 | 3.369676000000  | -0.708861000000 |
| C | -1.648674000000 | 3.227073000000  | 1.186652000000  |
| H | -2.546481000000 | 3.252774000000  | 1.815566000000  |
| H | -0.905931000000 | 2.591863000000  | 1.682233000000  |
| H | -1.241976000000 | 4.244073000000  | 1.127477000000  |

Table S7. Excited state Cartesian coordinates of Sexi\_Ph4

|   |                  |                 |                 |
|---|------------------|-----------------|-----------------|
| C | -12.588022000000 | 0.197499000000  | -0.969122000000 |
| C | -11.203197000000 | 0.290938000000  | -0.971275000000 |
| C | -10.418107000000 | -0.355700000000 | 0.013241000000  |
| C | -11.115048000000 | -1.099625000000 | 0.995199000000  |
| C | -12.500419000000 | -1.185064000000 | 0.990747000000  |
| C | -13.272339000000 | -0.539800000000 | 0.010979000000  |
| H | -13.155269000000 | 0.694342000000  | -1.752988000000 |
| H | -10.715280000000 | 0.838904000000  | -1.770678000000 |
| H | -10.561521000000 | -1.589349000000 | 1.789654000000  |
| H | -12.999757000000 | -1.760092000000 | 1.767305000000  |
| C | -8.958085000000  | -0.263205000000 | 0.013095000000  |
| C | -8.144228000000  | -1.253657000000 | 0.622026000000  |
| C | -8.276536000000  | 0.822291000000  | -0.596971000000 |
| C | -6.768057000000  | -1.172071000000 | 0.617373000000  |
| H | -8.611319000000  | -2.119269000000 | 1.080504000000  |
| C | -6.901279000000  | 0.916879000000  | -0.591430000000 |
| H | -8.849914000000  | 1.619862000000  | -1.058306000000 |
| C | -6.077488000000  | -0.078301000000 | 0.014649000000  |
| H | -6.203919000000  | -1.955942000000 | 1.110309000000  |
| H | -6.440240000000  | 1.763350000000  | -1.088138000000 |
| C | -4.635911000000  | 0.013244000000  | 0.016055000000  |
| C | -3.955015000000  | 1.233326000000  | -0.270301000000 |
| C | -3.801042000000  | -1.102669000000 | 0.327430000000  |
| C | -2.579695000000  | 1.372218000000  | -0.298160000000 |
| H | -4.546327000000  | 2.133355000000  | -0.404720000000 |
| C | -2.433377000000  | -0.996311000000 | 0.301242000000  |
| H | -4.243096000000  | -2.071726000000 | 0.529753000000  |
| C | -1.750353000000  | 0.210523000000  | -0.052344000000 |
| H | -1.841406000000  | -1.888908000000 | 0.474910000000  |
| C | -0.306419000000  | 0.176379000000  | -0.140968000000 |
| C | 0.456549000000   | -0.672727000000 | 0.721402000000  |
| C | 0.450398000000   | 0.919626000000  | -1.099223000000 |
| C | 1.828827000000   | -0.758076000000 | 0.645572000000  |
| H | -0.054990000000  | -1.209765000000 | 1.513463000000  |
| C | 1.823484000000   | 0.833162000000  | -1.170245000000 |
| H | -0.068976000000  | 1.502981000000  | -1.848986000000 |
| C | 2.577850000000   | -0.015419000000 | -0.310950000000 |
| H | 2.352592000000   | -1.346331000000 | 1.390070000000  |

|   |                  |                 |                 |
|---|------------------|-----------------|-----------------|
| H | 2.341824000000   | 1.377320000000  | -1.953913000000 |
| C | 4.035906000000   | -0.046383000000 | -0.395037000000 |
| C | 4.840662000000   | -1.227383000000 | -0.270483000000 |
| C | 4.714817000000   | 1.179991000000  | -0.622695000000 |
| C | 6.226074000000   | -1.102896000000 | -0.323148000000 |
| C | 6.091807000000   | 1.272376000000  | -0.664357000000 |
| H | 4.124890000000   | 2.085907000000  | -0.719981000000 |
| C | 6.897726000000   | 0.124110000000  | -0.504164000000 |
| H | 6.818120000000   | -2.006436000000 | -0.208714000000 |
| H | 6.553752000000   | 2.238564000000  | -0.840044000000 |
| C | 8.366638000000   | 0.201981000000  | -0.537614000000 |
| C | 9.047740000000   | 1.368607000000  | -0.130251000000 |
| C | 9.155291000000   | -0.880297000000 | -0.982446000000 |
| C | 10.435164000000  | 1.443130000000  | -0.162533000000 |
| H | 8.481575000000   | 2.215387000000  | 0.244616000000  |
| C | 10.542071000000  | -0.797246000000 | -1.014509000000 |
| H | 8.671994000000   | -1.782511000000 | -1.343542000000 |
| C | 11.214913000000  | 0.363704000000  | -0.604042000000 |
| H | 10.926844000000  | 2.355684000000  | 0.166520000000  |
| H | 11.117472000000  | -1.644936000000 | -1.379410000000 |
| C | -14.780647000000 | -0.601364000000 | 0.034740000000  |
| H | -15.104973000000 | -1.563164000000 | 0.452721000000  |
| H | -15.168266000000 | -0.560941000000 | -0.991523000000 |
| C | -15.423947000000 | 0.538517000000  | 0.853583000000  |
| H | -15.035944000000 | 0.502858000000  | 1.879274000000  |
| H | -15.099297000000 | 1.501298000000  | 0.439436000000  |
| C | -16.953159000000 | 0.467310000000  | 0.871507000000  |
| H | -17.301953000000 | -0.474616000000 | 1.309975000000  |
| H | -17.382411000000 | 1.285967000000  | 1.458017000000  |
| H | -17.365861000000 | 0.531849000000  | -0.141736000000 |
| C | 12.724183000000  | 0.433306000000  | -0.598929000000 |
| H | 13.046035000000  | 1.466636000000  | -0.780471000000 |
| H | 13.123141000000  | -0.167204000000 | -1.426429000000 |
| C | 13.349427000000  | -0.060158000000 | 0.722718000000  |
| H | 12.948451000000  | 0.536736000000  | 1.552662000000  |
| H | 13.025085000000  | -1.092832000000 | 0.907912000000  |
| C | 14.880775000000  | 0.009461000000  | 0.728480000000  |
| H | 15.199121000000  | 1.044697000000  | 0.538856000000  |
| H | 15.275622000000  | -0.585569000000 | -0.107626000000 |
| C | 15.509357000000  | -0.480676000000 | 2.038861000000  |
| H | 15.114551000000  | 0.114199000000  | 2.873567000000  |
| H | 15.190958000000  | -1.514862000000 | 2.227485000000  |
| C | 17.039283000000  | -0.408974000000 | 2.039014000000  |
| H | 17.456804000000  | -0.765157000000 | 2.986314000000  |
| H | 17.465045000000  | -1.022297000000 | 1.236721000000  |
| H | 17.388052000000  | 0.618935000000  | 1.887785000000  |
| C | 4.266287000000   | -2.633017000000 | -0.233244000000 |
| H | 5.064295000000   | -3.320928000000 | 0.067434000000  |
| H | 3.480861000000   | -2.736502000000 | 0.518254000000  |
| C | 3.705864000000   | -3.081535000000 | -1.596290000000 |
| H | 2.882065000000   | -2.437163000000 | -1.915278000000 |
| H | 4.481607000000   | -3.043885000000 | -2.367625000000 |
| H | 3.330411000000   | -4.108595000000 | -1.539534000000 |
| C | -2.027271000000  | 2.783438000000  | -0.405104000000 |
| H | -1.272510000000  | 2.872453000000  | -1.190690000000 |
| H | -2.847237000000  | 3.445929000000  | -0.703227000000 |
| C | -1.425809000000  | 3.299518000000  | 0.915577000000  |
| H | -2.172112000000  | 3.276142000000  | 1.715892000000  |
| H | -0.574506000000  | 2.690093000000  | 1.230137000000  |
| H | -1.079356000000  | 4.332164000000  | 0.802283000000  |

- [1] P. Guiglion and M. A. Zwijnenburg, *Phys Chem Chem Phys*, 2015, 17, 17854-17863.
